# Supplementary material for: The Species Effect: Differential Sphingosine-1-Phosphate Responses in the Bone in Human Versus Mouse
Source: Int J Mol Sci. 2024 May 8;25(10):5118. doi: 10.3390/ijms25105118 (PMC11121697; doi:10.3390/ijms25105118)
Supplement: Supplementary file 1 [file ijms-25-05118-s001.zip › Supplementary Figure legends.pdf]

## GSE128423 - Mouse

## GSE147287 - Human

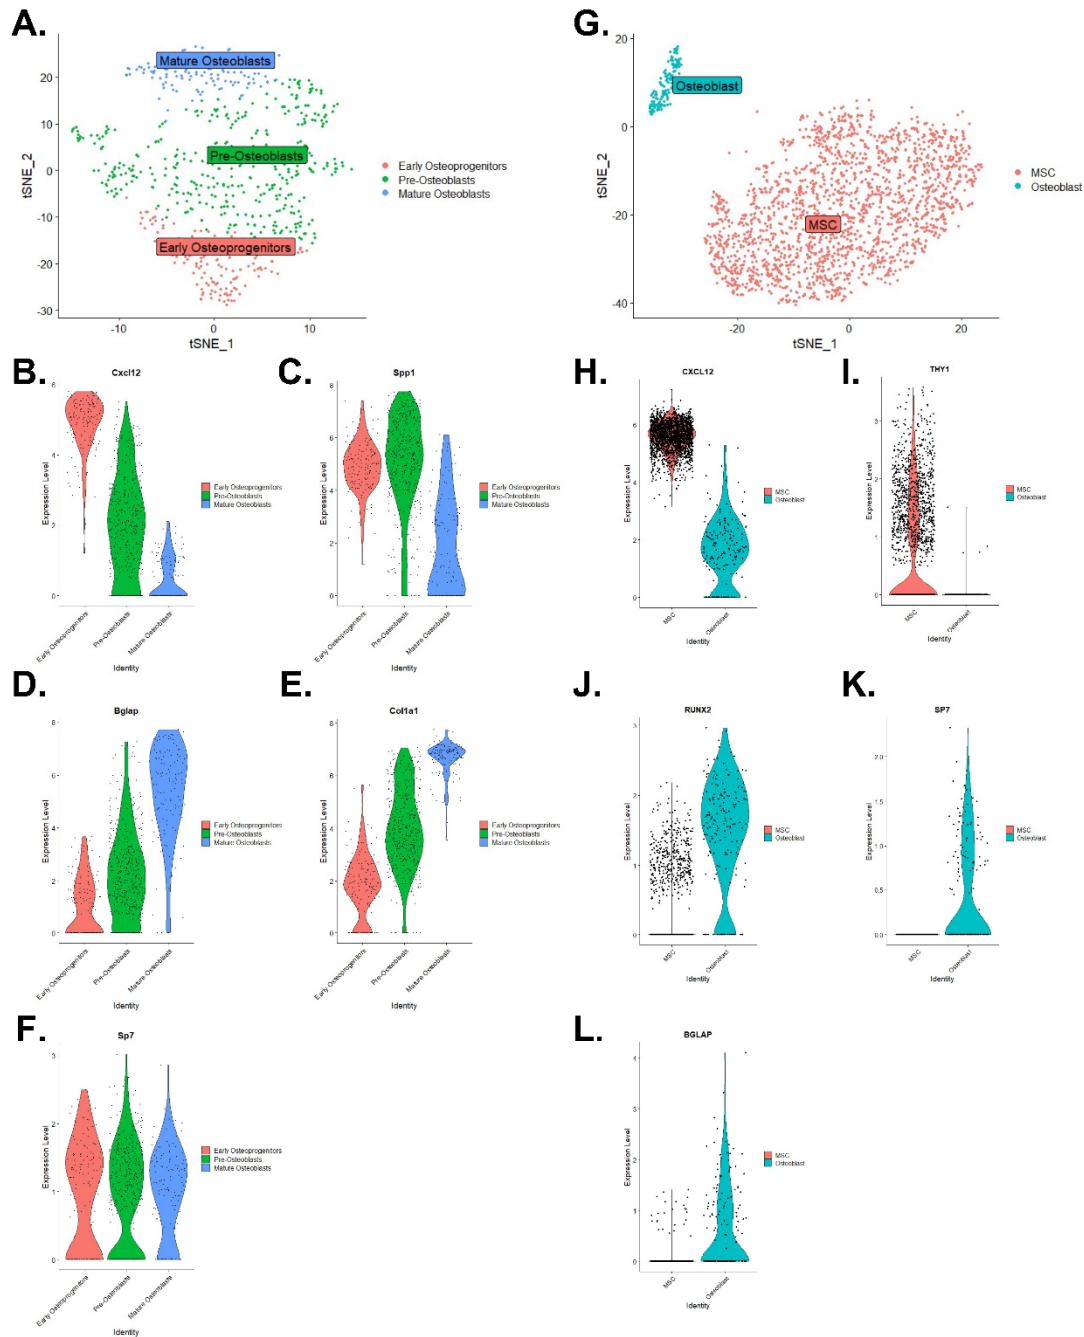

### Supplementary Figure S1: Clustering of Osteoblast subsets.

(A-F) Publicly available single cell sequencing dataset GSE128423 (Mouse) was analysed for osteoblasts and subsequently clustered into three subgroups. (A) Dotplot of clustered Early Osteoprogenitors, Pre-Osteoblasts and Mature Osteoblasts. (B-F) Violin plots showing gene expression of *Cxcl12* (B), *Spp1* (C), *Bglap* (D), *Col1a1* (E) and *Sp7* (F) in each of the subgroups. (G-L) GSE14787 (Human) publicly available dataset was clustered for stromal type cells and further split into mesenchymal stem cells and osteoblasts. (G) Dotplot of clustered MSCs and Osteoblasts. (H-L) Violin plots showing gene expression of *CXCL12* (H), *THY1* (I), *RUNX2* (J), *SP7* (K) and *BGLAP* (L) in MSC and osteoblast subgroups.

## GSE147174 - Mouse

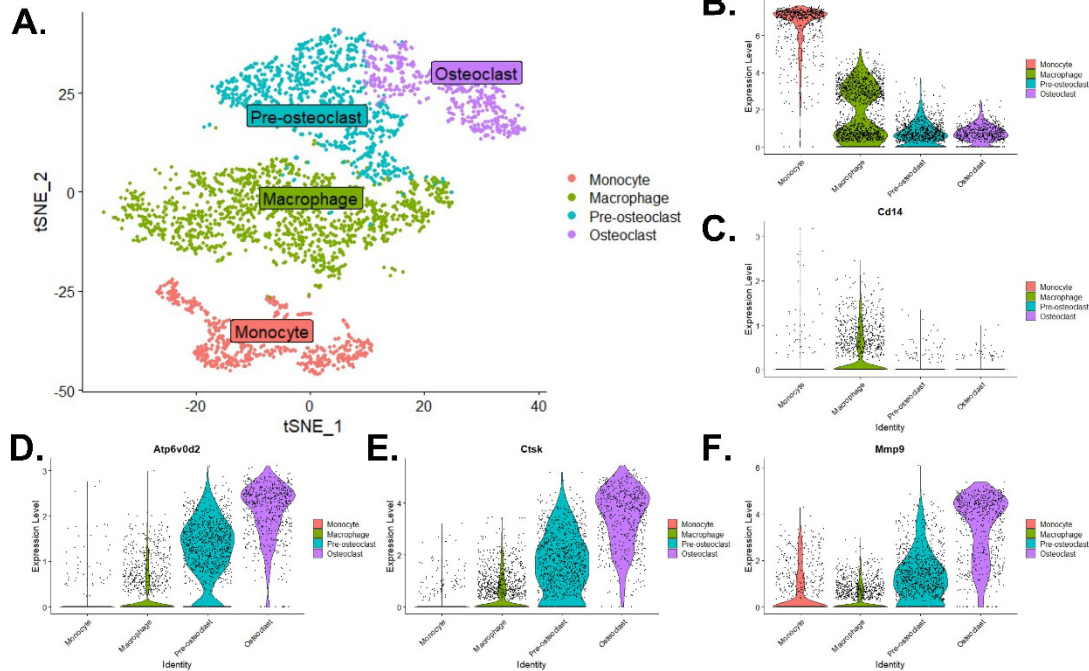

## GSE162454 - Human

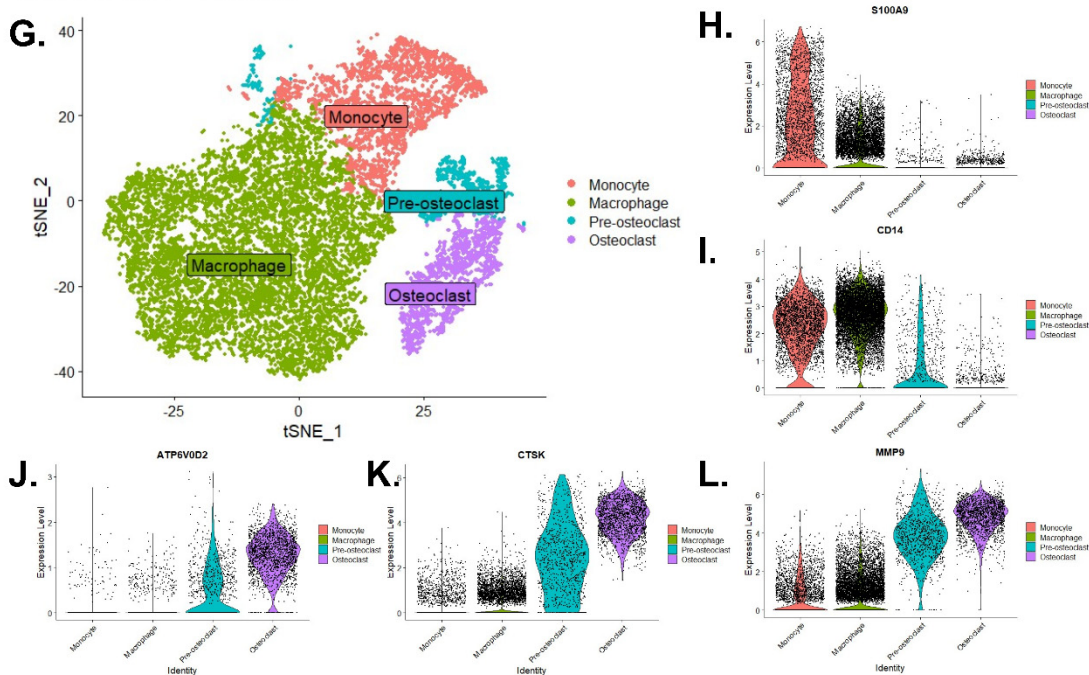

### Supplementary Figure S2: Clustering of Osteoclast subsets.

(A-F) Publicly available single cell sequencing dataset GSE147174 (Mouse) was analysed for cells involved in. (A) Dotplot of clustered Monocytes, Macrophages. Pre-Osteoclasts and Osteoclasts. (B-F) Violin plots showing gene expression of S100a8 (B), Cd14 (C), Atp6v0d2 (D), Ctsk (E) and Mmp9 (F) in each of the subgroups. (G-L) The publicly available dataset GSE162454 was clustered for osteoclast lineage cells and clustered into 4 subgroups. (G) Dotplot of clustered Monocytes, Macrophages. Pre-Osteoclasts and Osteoclasts. (H-L) Violin plots showing gene expression of S100A8 (H), CD14 (I), ATP6V0D2 (J), CTSK (K) and MMP9 (L) in each cell subset.
