# Supplementary material for: The Species Effect: Differential Sphingosine-1-Phosphate Responses in the Bone in Human Versus Mouse
Source: Int J Mol Sci. 2024 May 8;25(10):5118. doi: 10.3390/ijms25105118 (PMC11121697; doi:10.3390/ijms25105118)
Supplement: Supplementary file 1 [file ijms-25-05118-s001.zip › Supplementary Table S1_Significantly downregulated genes by Padj value.xlsx]

## Sheet: Significantly downregulated gen
Column1	baseMean	log2FoldChange	lfcSE	stat	pvalue	padj	ensembl	entrez	mgi_symbol
ENSMUSG00000040533	1720.02	4.78623	0.190741	25.0928	5.96386e-139	2.57251e-135	ENSMUSG00000040533	17180	Matn1
ENSMUSG00000053310	1140.66	3.99561	0.225982	17.6811	5.86465e-70	1.44555e-66	ENSMUSG00000053310	64011	Nrgn
ENSMUSG00000028626	4703.7	2.73582	0.186218	14.6915	7.31119e-49	7.88421e-46	ENSMUSG00000028626	12840	Col9a2
ENSMUSG00000027559	13117.6	3.29998	0.229313	14.3907	5.91611e-47	4.86079e-44	ENSMUSG00000027559	12350	Car3
ENSMUSG00000029309	40933.9	1.97371	0.144633	13.6463	2.12376e-42	1.40936e-39	ENSMUSG00000029309	13602	Sparcl1
ENSMUSG00000086596	456.531	3.01777	0.233147	12.9436	2.55281e-38	1.42085e-35	ENSMUSG00000086596	382111	Susd5
ENSMUSG00000024330	3207.13	2.51454	0.211959	11.8633	1.83504e-32	7.53852e-30	ENSMUSG00000024330	12815	Col11a2
ENSMUSG00000015354	1785.42	3.08284	0.26335	11.7063	1.18383e-31	4.34592e-29	ENSMUSG00000015354	76477	Pcolce2
ENSMUSG00000022483	79579.6	1.83536	0.156999	11.6903	1.42851e-31	5.13489e-29	ENSMUSG00000022483	12824	Col2a1
ENSMUSG00000033208	2197.38	2.26141	0.196073	11.5335	8.94432e-31	2.96779e-28	ENSMUSG00000033208	20203	S100b
ENSMUSG00000025213	3727.75	2.62583	0.228261	11.5036	1.26479e-30	4.11749e-28	ENSMUSG00000025213	107250	Kazald1
ENSMUSG00000036766	457.98	2.30795	0.205182	11.2483	2.36099e-29	7.27436e-27	ENSMUSG00000036766	227325	Dner
ENSMUSG00000040856	1189.54	2.34814	0.217644	10.7889	3.88343e-27	1.06357e-24	ENSMUSG00000040856	13386	Dlk1
ENSMUSG00000027386	557.908	2.27026	0.217842	10.4216	1.97589e-25	5.01353e-23	ENSMUSG00000027386	70370	Fbln7
ENSMUSG00000039405	22071.9	1.33666	0.129577	10.3156	5.99272e-25	1.45632e-22	ENSMUSG00000039405	76453	Prss23
ENSMUSG00000016995	72475.8	2.20535	0.21429	10.2914	7.70142e-25	1.79568e-22	ENSMUSG00000016995	17183	Matn4
ENSMUSG00000011118	639.242	4.03258	0.39226	10.2804	8.63892e-25	1.98741e-22	ENSMUSG00000011118	208098	Panx3
ENSMUSG00000045672	5483.16	1.81383	0.17759	10.2136	1.72371e-24	3.91328e-22	ENSMUSG00000045672	373864	Col27a1
ENSMUSG00000054252	727.514	2.06882	0.20959	9.87083	5.57038e-23	1.13072e-20	ENSMUSG00000054252	14184	Fgfr3
ENSMUSG00000029307	834.649	2.79381	0.287141	9.72974	2.25169e-22	4.51752e-20	ENSMUSG00000029307	13406	Dmp1
ENSMUSG00000043747	2030.58	2.8078	0.288733	9.72454	2.36969e-22	4.69961e-20	ENSMUSG00000043747	320309	1520401A03Rik
ENSMUSG00000017969	5411.52	1.13304	0.120993	9.36453	7.63889e-21	1.31801e-18	ENSMUSG00000017969	19223	Ptgis
ENSMUSG00000026147	4813.23	2.19018	0.235194	9.31222	1.25191e-20	2.13865e-18	ENSMUSG00000026147	12839	Col9a1
ENSMUSG00000048368	6915.94	1.81902	0.197975	9.18816	3.99619e-20	6.5667e-18	ENSMUSG00000048368	27047	Omd
ENSMUSG00000045287	261.874	2.37536	0.258676	9.18276	4.20176e-20	6.83935e-18	ENSMUSG00000045287	237847	Rtn4rl1
ENSMUSG00000027165	3666.91	1.15989	0.126894	9.14064	6.20842e-20	1.00112e-17	ENSMUSG00000027165	68170	Iftap
ENSMUSG00000025776	1440.42	2.45339	0.270204	9.07978	1.08791e-19	1.72209e-17	ENSMUSG00000025776	83691	Crispld1
ENSMUSG00000068196	99876.9	1.59556	0.177187	9.00497	2.1572e-19	3.38366e-17	ENSMUSG00000068196	12837	Col8a1
ENSMUSG00000005583	4363.09	1.32101	0.148302	8.90758	5.21567e-19	7.69156e-17	ENSMUSG00000005583	17260	Mef2c
ENSMUSG00000042745	3160.66	1.2601	0.141636	8.89672	5.75192e-19	8.33979e-17	ENSMUSG00000042745	15901	Id1
ENSMUSG00000041556	1881.42	1.83926	0.206999	8.88536	6.37157e-19	9.16126e-17	ENSMUSG00000041556	230904	Fbxo2
ENSMUSG00000024049	358.441	2.42458	0.275677	8.795	1.43047e-18	1.99044e-16	ENSMUSG00000024049	17929	Myom1
ENSMUSG00000036533	2381.44	1.50042	0.171429	8.75244	2.08791e-18	2.8366e-16	ENSMUSG00000036533	260409	Cdc42ep3
ENSMUSG00000041377	78.0475	3.76979	0.43459	8.67435	4.15923e-18	5.39574e-16	ENSMUSG00000041377	29862	Ninj2
ENSMUSG00000030607	3066.81	2.02777	0.234058	8.66354	4.57319e-18	5.88849e-16	ENSMUSG00000030607	11595	Acan
ENSMUSG00000090210	489.018	1.97571	0.229273	8.61728	6.85624e-18	8.69835e-16	ENSMUSG00000090210	213119	Itga10
ENSMUSG00000022025	17597.1	2.29108	0.267139	8.57637	9.79154e-18	1.21542e-15	ENSMUSG00000022025	16840	Cnmd
ENSMUSG00000089661	1890.21	2.47741	0.290057	8.54111	1.32937e-17	1.62673e-15	ENSMUSG00000089661	12587	Mia
ENSMUSG00000089774	2542.11	1.45141	0.169972	8.53911	1.35261e-17	1.64352e-15	ENSMUSG00000089774	53881	Slc5a3
ENSMUSG00000027966	30491.2	1.51317	0.179128	8.44738	2.97914e-17	3.52069e-15	ENSMUSG00000027966	12814	Col11a1
ENSMUSG00000066058	457.728	1.64556	0.197449	8.33408	7.81063e-17	8.98431e-15	ENSMUSG00000066058	242653	Cldn19
ENSMUSG00000060548	206.021	3.31101	0.398174	8.31549	9.13779e-17	1.03726e-14	ENSMUSG00000060548	29820	Tnfrsf19
ENSMUSG00000037962	219.632	2.47278	0.299397	8.25919	1.46665e-16	1.60162e-14	ENSMUSG00000037962	73121	Rflna
ENSMUSG00000027004	611.951	2.04509	0.250256	8.172	3.03328e-16	3.22895e-14	ENSMUSG00000027004	20378	Frzb
ENSMUSG00000038418	3949.32	1.07719	0.132266	8.1441	3.82128e-16	4.02026e-14	ENSMUSG00000038418	13653	Egr1
ENSMUSG00000063430	155.938	2.83308	0.350585	8.08103	6.42234e-16	6.63539e-14	ENSMUSG00000063430	320916	Wscd2
ENSMUSG00000026697	106.864	5.25268	0.651053	8.06798	7.14726e-16	7.3404e-14	ENSMUSG00000026697	17926	Myoc
ENSMUSG00000028838	255.092	2.37674	0.295685	8.03806	9.12731e-16	9.3185e-14	ENSMUSG00000028838	56219	Extl1
ENSMUSG00000040164	358.93	1.97194	0.245348	8.03731	9.183e-16	9.3202e-14	ENSMUSG00000040164	16538	Kcns1
ENSMUSG00000034687	338.72	3.44828	0.43014	8.01666	1.08659e-15	1.0837e-13	ENSMUSG00000034687	231470	Fras1
ENSMUSG00000039084	179.643	4.13411	0.51892	7.96677	1.6288e-15	1.61513e-13	ENSMUSG00000039084	12643	Chad
ENSMUSG00000033377	619.062	2.44454	0.308121	7.93372	2.12671e-15	2.06147e-13	ENSMUSG00000033377	114301	Palmd
ENSMUSG00000020173	481.735	2.11685	0.267732	7.9066	2.64518e-15	2.54971e-13	ENSMUSG00000020173	12808	Cobl
ENSMUSG00000020019	948.162	1.73054	0.219939	7.86827	3.59586e-15	3.39032e-13	ENSMUSG00000020019	57764	Ntn4
ENSMUSG00000051910	1216.23	1.11802	0.142871	7.82539	5.06082e-15	4.64465e-13	ENSMUSG00000051910	20679	Sox6
ENSMUSG00000036570	4104.28	1.27446	0.163487	7.79551	6.41488e-15	5.85621e-13	ENSMUSG00000036570	56188	Fxyd1
ENSMUSG00000040759	226.188	2.46776	0.320582	7.69776	1.38473e-14	1.20667e-12	ENSMUSG00000040759	67272	Cmtm5
ENSMUSG00000036030	218.444	2.76816	0.359588	7.69813	1.38068e-14	1.20667e-12	ENSMUSG00000036030	235472	Prtg
ENSMUSG00000038816	766.647	1.41684	0.185228	7.64913	2.02346e-14	1.72836e-12	ENSMUSG00000038816	54366	Ctnnal1
ENSMUSG00000002985	4528.06	1.22185	0.161355	7.57241	3.6636e-14	3.01008e-12	ENSMUSG00000002985	11816	Apoe
ENSMUSG00000038370	2546.03	1.17052	0.154858	7.55871	4.07086e-14	3.32885e-12	ENSMUSG00000038370	66425	Pcp4l1
ENSMUSG00000007655	3254.22	1.08776	0.144579	7.52361	5.32838e-14	4.31288e-12	ENSMUSG00000007655	12389	Cav1
ENSMUSG00000074483	45.687	8.45092	1.12707	7.4981	6.47497e-14	5.19624e-12	ENSMUSG00000074483	12096	Bglap
ENSMUSG00000045103	585.472	1.34364	0.180423	7.44716	9.53698e-14	7.54822e-12	ENSMUSG00000045103	13405	Dmd
ENSMUSG00000037138	1789.43	1.305	0.175267	7.44579	9.63657e-14	7.59221e-12	ENSMUSG00000037138	16764	Aff3
ENSMUSG00000039239	6366.91	0.897463	0.120583	7.44273	9.8628e-14	7.73513e-12	ENSMUSG00000039239	21808	Tgfb2
ENSMUSG00000035783	69016.1	0.816746	0.109971	7.42695	1.11133e-13	8.67641e-12	ENSMUSG00000035783	11475	Acta2
ENSMUSG00000027217	648.243	1.87634	0.254598	7.36981	1.70869e-13	1.29875e-11	ENSMUSG00000027217	241556	Tspan18
ENSMUSG00000074486	37.5007	8.39925	1.15092	7.29788	2.92342e-13	2.17417e-11	ENSMUSG00000074486	12097	Bglap2
ENSMUSG00000061718	366.298	2.75756	0.378388	7.28766	3.15377e-13	2.32544e-11	ENSMUSG00000061718	19049	Ppp1r1b
ENSMUSG00000031292	711.35	1.24813	0.171361	7.28364	3.24926e-13	2.38565e-11	ENSMUSG00000031292	382253	Cdkl5
ENSMUSG00000068740	171.852	2.86029	0.395619	7.2299	4.83366e-13	3.44628e-11	ENSMUSG00000068740	53883	Celsr2
ENSMUSG00000067780	313.831	1.96217	0.27421	7.15574	8.32216e-13	5.76669e-11	ENSMUSG00000067780	94227	Pi15
ENSMUSG00000030022	1531.25	1.4725	0.206311	7.13727	9.52008e-13	6.57038e-11	ENSMUSG00000030022	101401	Adamts9
ENSMUSG00000079055	335.69	2.75337	0.386016	7.13279	9.83583e-13	6.76125e-11	ENSMUSG00000079055	110893	Slc8a3
ENSMUSG00000042359	1165.6	1.0945	0.153571	7.12704	1.02547e-12	7.02119e-11	ENSMUSG00000042359	99031	Osbpl6
ENSMUSG00000073530	3228.58	1.28774	0.180834	7.12114	1.07037e-12	7.27094e-11	ENSMUSG00000073530	23850	Pappa2
ENSMUSG00000027570	4714.96	1.56567	0.221395	7.07185	1.52885e-12	1.01457e-10	ENSMUSG00000027570	12841	Col9a3
ENSMUSG00000031610	541.647	2.02724	0.28681	7.06824	1.56909e-12	1.03728e-10	ENSMUSG00000031610	20284	Scrg1
ENSMUSG00000031253	5962.36	0.843184	0.119377	7.06323	1.62675e-12	1.0713e-10	ENSMUSG00000031253	68792	Srpx2
ENSMUSG00000020183	802.208	2.22117	0.316071	7.02744	2.10363e-12	1.36966e-10	ENSMUSG00000020183	70574	Cpm
ENSMUSG00000001864	680.565	1.26647	0.182606	6.93552	4.04722e-12	2.57678e-10	ENSMUSG00000001864	108897	Aif1l
ENSMUSG00000049551	1146.74	1.85371	0.268158	6.91277	4.75285e-12	2.98612e-10	ENSMUSG00000049551	14371	Fzd9
ENSMUSG00000002265	2572.62	1.30587	0.189145	6.90408	5.05309e-12	3.13619e-10	ENSMUSG00000002265	18616	Peg3
ENSMUSG00000037736	3311.47	1.32796	0.192562	6.89627	5.33862e-12	3.30152e-10	ENSMUSG00000037736	77569	Limch1
ENSMUSG00000026255	173.389	3.12334	0.455361	6.85904	6.93268e-12	4.24172e-10	ENSMUSG00000026255	98363	Efhd1
ENSMUSG00000041731	1046.71	1.38923	0.202653	6.85521	7.12098e-12	4.34153e-10	ENSMUSG00000041731	226041	Pgm5
ENSMUSG00000048058	963.59	1.64001	0.241203	6.79927	1.05153e-11	6.34375e-10	ENSMUSG00000048058	241576	Ldlrad3
ENSMUSG00000051236	4850.65	0.973982	0.144088	6.75964	1.38332e-11	8.28743e-10	ENSMUSG00000051236	320183	Msrb3
ENSMUSG00000026051	10377.9	0.844638	0.125096	6.75189	1.45928e-11	8.68223e-10	ENSMUSG00000026051	78896	Ecrg4
ENSMUSG00000027831	501.157	1.26079	0.187131	6.73746	1.61183e-11	9.52416e-10	ENSMUSG00000027831	72789	Veph1
ENSMUSG00000031906	1956.57	1.5417	0.231489	6.65993	2.7396e-11	1.59693e-09	ENSMUSG00000031906	58994	Smpd3
ENSMUSG00000015222	641.147	1.18673	0.17843	6.65095	2.91199e-11	1.68038e-09	ENSMUSG00000015222	17756	Map2
ENSMUSG00000040998	10215.3	1.29376	0.195828	6.60662	3.93204e-11	2.26145e-09	ENSMUSG00000040998	114249	Npnt
ENSMUSG00000017007	116.474	3.76955	0.571332	6.59782	4.17241e-11	2.39172e-09	ENSMUSG00000017007	19668	Rbpjl
ENSMUSG00000047420	225.47	2.02694	0.307311	6.59571	4.23218e-11	2.41795e-09	ENSMUSG00000047420	208164	Fam180a
ENSMUSG00000017639	203.247	3.15324	0.481931	6.54292	6.03273e-11	3.39051e-09	ENSMUSG00000017639	268451	Rab11fip4
ENSMUSG00000030513	1655.45	1.56953	0.240221	6.5337	6.41628e-11	3.58274e-09	ENSMUSG00000030513	18553	Pcsk6
ENSMUSG00000047787	1177.49	1.41632	0.217717	6.50535	7.75124e-11	4.30032e-09	ENSMUSG00000047787	396184	Flrt1
ENSMUSG00000026360	2754.38	1.30221	0.20037	6.49902	8.08465e-11	4.47091e-09	ENSMUSG00000026360	19735	Rgs2
ENSMUSG00000048388	2535.3	1.15359	0.178137	6.47583	9.42928e-11	5.13227e-09	ENSMUSG00000048388	241520	Fam171b
ENSMUSG00000052854	902.471	1.94059	0.30308	6.40289	1.52466e-10	8.1193e-09	ENSMUSG00000052854	27206	Nrk
ENSMUSG00000052387	1220.81	1.20219	0.188409	6.38073	1.76249e-10	9.27133e-09	ENSMUSG00000052387	226025	Trpm3
ENSMUSG00000001334	486.051	1.70834	0.269153	6.3471	2.19419e-10	1.14755e-08	ENSMUSG00000001334	384061	Fndc5
ENSMUSG00000022419	2059.16	0.852042	0.13479	6.32128	2.59409e-10	1.35222e-08	ENSMUSG00000022419	97998	Deptor
ENSMUSG00000002944	286.778	2.09932	0.333955	6.28622	3.25288e-10	1.66544e-08	ENSMUSG00000002944	12491	Cd36
ENSMUSG00000000567	23203.2	0.834207	0.132926	6.27574	3.47978e-10	1.76588e-08	ENSMUSG00000000567	20682	Sox9
ENSMUSG00000060284	187.253	2.15662	0.344118	6.26708	3.67872e-10	1.85051e-08	ENSMUSG00000060284	170574	Sp7
ENSMUSG00000025932	2946.85	1.14255	0.183609	6.22274	4.88538e-10	2.4222e-08	ENSMUSG00000025932	14048	Eya1
ENSMUSG00000030849	3698.24	1.19913	0.193188	6.20708	5.39766e-10	2.65331e-08	ENSMUSG00000030849	14183	Fgfr2
ENSMUSG00000019936	252.655	1.75991	0.283803	6.20116	5.60467e-10	2.74724e-08	ENSMUSG00000019936	13516	Epyc
ENSMUSG00000028927	83.0144	3.92815	0.634265	6.19324	5.89407e-10	2.88092e-08	ENSMUSG00000028927	18600	Padi2
ENSMUSG00000032366	35993.9	0.772305	0.126417	6.10921	1.00129e-09	4.75929e-08	ENSMUSG00000032366	22003	Tpm1
ENSMUSG00000042834	5307.76	0.770852	0.126606	6.0886	1.13903e-09	5.32597e-08	ENSMUSG00000042834	27528	Nrep
ENSMUSG00000021779	658.086	1.17871	0.193698	6.08532	1.16262e-09	5.42158e-08	ENSMUSG00000021779	21834	Thrb
ENSMUSG00000018849	1372.07	1.19648	0.197214	6.06689	1.30409e-09	6.0486e-08	ENSMUSG00000018849	211652	Wwc1
ENSMUSG00000023909	257.795	1.42058	0.235351	6.03601	1.57968e-09	7.24888e-08	ENSMUSG00000023909	76498	Paqr4
ENSMUSG00000038248	5821.28	0.956189	0.158582	6.02963	1.64333e-09	7.52097e-08	ENSMUSG00000038248	109205	Sobp
ENSMUSG00000005611	440.555	1.26959	0.21068	6.02613	1.67933e-09	7.66537e-08	ENSMUSG00000005611	17540	Irag1
ENSMUSG00000026768	520.202	1.30116	0.216029	6.02306	1.71153e-09	7.79176e-08	ENSMUSG00000026768	241226	Itga8
ENSMUSG00000039717	759.273	1.61118	0.268984	5.98987	2.10013e-09	9.51069e-08	ENSMUSG00000039717	76897	Ralyl
ENSMUSG00000030498	958.351	0.999381	0.167228	5.97615	2.28476e-09	1.02927e-07	ENSMUSG00000030498	14453	Gas2
ENSMUSG00000039680	3492.53	0.956498	0.160353	5.96494	2.44726e-09	1.09391e-07	ENSMUSG00000039680	121022	Mrps6
ENSMUSG00000030739	63.1407	3.96379	0.664907	5.96142	2.5005e-09	1.11195e-07	ENSMUSG00000030739	71960	Myh14
ENSMUSG00000022090	9249.7	0.68344	0.1147	5.95849	2.5458e-09	1.12919e-07	ENSMUSG00000022090	213019	Pdlim2
ENSMUSG00000049122	279.771	1.59685	0.268253	5.95276	2.63661e-09	1.16348e-07	ENSMUSG00000049122	242506	Frmd3
ENSMUSG00000049556	285.933	1.59022	0.269375	5.90335	3.5619e-09	1.53643e-07	ENSMUSG00000049556	235402	Lingo1
ENSMUSG00000021676	2736.11	1.1905	0.201923	5.89581	3.72857e-09	1.60431e-07	ENSMUSG00000021676	544963	Iqgap2
ENSMUSG00000004892	61.8107	4.18753	0.710374	5.89482	3.75092e-09	1.60991e-07	ENSMUSG00000004892	12032	Bcan
ENSMUSG00000098294	19.6223	7.64728	1.2993	5.8857	3.96364e-09	1.69699e-07	ENSMUSG00000098294	NA	Gm27204
ENSMUSG00000039323	76136.1	1.07073	0.18309	5.84812	4.9717e-09	2.09204e-07	ENSMUSG00000039323	16008	Igfbp2
ENSMUSG00000069769	2475.21	0.954776	0.163365	5.84444	5.08275e-09	2.12858e-07	ENSMUSG00000069769	76626	Msi2
ENSMUSG00000062980	2592.04	0.939526	0.160798	5.84289	5.13035e-09	2.14332e-07	ENSMUSG00000062980	214642	Cped1
ENSMUSG00000039706	265.97	1.94815	0.334357	5.82656	5.6582e-09	2.35245e-07	ENSMUSG00000039706	16826	Ldb2
ENSMUSG00000026668	1525.07	1.54341	0.264926	5.82579	5.68429e-09	2.35761e-07	ENSMUSG00000026668	68527	Ucma
ENSMUSG00000044252	2494.06	0.774221	0.132987	5.82179	5.82196e-09	2.40316e-07	ENSMUSG00000044252	64291	Osbpl1a
ENSMUSG00000050222	915.942	1.33074	0.228859	5.81469	6.07464e-09	2.50148e-07	ENSMUSG00000050222	239114	Il17d
ENSMUSG00000062329	6002.12	3.86558	0.666002	5.80416	6.46897e-09	2.64492e-07	ENSMUSG00000062329	231162	Cytl1
ENSMUSG00000047146	557.439	1.30375	0.224955	5.79562	6.80704e-09	2.7635e-07	ENSMUSG00000047146	52463	Tet1
ENSMUSG00000047446	914.387	0.965796	0.166635	5.79589	6.79585e-09	2.7635e-07	ENSMUSG00000047446	11861	Arl4a
ENSMUSG00000004032	3343.26	0.666653	0.115628	5.76547	8.14291e-09	3.26739e-07	ENSMUSG00000004032	14866	Gstm5
ENSMUSG00000021613	965.989	1.66463	0.288886	5.76225	8.29997e-09	3.32268e-07	ENSMUSG00000021613	12950	Hapln1
ENSMUSG00000060424	3941.36	1.06344	0.184848	5.75306	8.76408e-09	3.48423e-07	ENSMUSG00000060424	66297	Pantr1
ENSMUSG00000022096	157.328	2.02204	0.353954	5.71272	1.11182e-08	4.35987e-07	ENSMUSG00000022096	15460	Hr
ENSMUSG00000045573	31433.6	0.958913	0.168272	5.69858	1.20806e-08	4.69456e-07	ENSMUSG00000045573	18619	Penk
ENSMUSG00000030201	3295.05	0.848627	0.149355	5.68197	1.33154e-08	5.12822e-07	ENSMUSG00000030201	16974	Lrp6
ENSMUSG00000047361	71.4045	3.51517	0.619921	5.67034	1.42512e-08	5.46423e-07	ENSMUSG00000047361	381260	Gm973
ENSMUSG00000031112	330.599	2.19574	0.389327	5.63982	1.70225e-08	6.46931e-07	ENSMUSG00000031112	70415	Stk26
ENSMUSG00000031216	735.933	1.08977	0.193404	5.63466	1.75405e-08	6.63693e-07	ENSMUSG00000031216	236920	Stard8
ENSMUSG00000021750	35.7258	5.47083	0.973148	5.62179	1.88992e-08	7.13537e-07	ENSMUSG00000021750	268709	Fam107a
ENSMUSG00000022510	199.936	2.05093	0.365001	5.61898	1.92089e-08	7.23648e-07	ENSMUSG00000022510	22061	Trp63
ENSMUSG00000008136	1869.76	0.842775	0.150026	5.61752	1.93719e-08	7.26614e-07	ENSMUSG00000008136	14200	Fhl2
ENSMUSG00000044748	166.847	1.8647	0.332417	5.60952	2.02884e-08	7.57697e-07	ENSMUSG00000044748	13214	Defb1
ENSMUSG00000031626	3574.44	0.714031	0.127697	5.59158	2.25013e-08	8.3492e-07	ENSMUSG00000031626	234214	Sorbs2
ENSMUSG00000033998	116.574	2.2359	0.40138	5.57053	2.53968e-08	9.3432e-07	ENSMUSG00000033998	16525	Kcnk1
ENSMUSG00000026185	11334.1	1.28639	0.231181	5.56444	2.62996e-08	9.63424e-07	ENSMUSG00000026185	16011	Igfbp5
ENSMUSG00000029123	552.918	2.24829	0.40488	5.55298	2.80833e-08	1.02442e-06	ENSMUSG00000029123	64293	Stk32b
ENSMUSG00000050541	1013.37	1.3681	0.246749	5.5445	2.948e-08	1.07306e-06	ENSMUSG00000050541	11548	Adra1b
ENSMUSG00000044055	171.167	2.32351	0.419093	5.54413	2.95413e-08	1.07306e-06	ENSMUSG00000044055	260301	Otos
ENSMUSG00000032085	2189.57	0.904757	0.163323	5.53968	3.03023e-08	1.09839e-06	ENSMUSG00000032085	21345	Tagln
ENSMUSG00000066324	11720.8	0.584024	0.105693	5.52567	3.28238e-08	1.18482e-06	ENSMUSG00000066324	242291	Bpnt2
ENSMUSG00000050711	27.0207	6.57314	1.1901	5.52318	3.32922e-08	1.19921e-06	ENSMUSG00000050711	20254	Scg2
ENSMUSG00000058297	135.768	1.93334	0.350401	5.5175	3.43865e-08	1.23605e-06	ENSMUSG00000058297	94214	Spock2
ENSMUSG00000025993	279.306	1.79206	0.325026	5.51358	3.51617e-08	1.26129e-06	ENSMUSG00000025993	53945	Slc40a1
ENSMUSG00000102215	18.2683	7.05848	1.28325	5.50048	3.78759e-08	1.347e-06	ENSMUSG00000102215	100039861	Gm2464
ENSMUSG00000035606	35.0372	4.44342	0.807784	5.50075	3.78181e-08	1.347e-06	ENSMUSG00000035606	16716	Ky
ENSMUSG00000034765	536.243	1.01658	0.184827	5.50017	3.79415e-08	1.347e-06	ENSMUSG00000034765	240672	Dusp5
ENSMUSG00000009633	658.96	2.0039	0.365573	5.48155	4.21623e-08	1.48767e-06	ENSMUSG00000009633	14373	G0s2
ENSMUSG00000001552	413.538	1.23809	0.225973	5.47895	4.27863e-08	1.50048e-06	ENSMUSG00000001552	16480	Jup
ENSMUSG00000052397	3500.53	0.90265	0.164747	5.47901	4.27713e-08	1.50048e-06	ENSMUSG00000052397	22350	Ezr
ENSMUSG00000045515	5065.93	0.886989	0.161982	5.47585	4.3542e-08	1.52388e-06	ENSMUSG00000045515	18993	Pou3f3
ENSMUSG00000031613	184.822	2.15374	0.393516	5.47306	4.42321e-08	1.5449e-06	ENSMUSG00000031613	15446	Hpgd
ENSMUSG00000027508	363.054	1.61008	0.294221	5.47233	4.44154e-08	1.54817e-06	ENSMUSG00000027508	94212	Pag1
ENSMUSG00000004473	4245.29	0.837945	0.153487	5.45939	4.77773e-08	1.65865e-06	ENSMUSG00000004473	20256	Clec11a
ENSMUSG00000038679	8373.58	0.94948	0.175113	5.4221	5.89028e-08	2.00852e-06	ENSMUSG00000038679	83925	Trps1
ENSMUSG00000020793	70.12	2.49553	0.461239	5.41049	6.28517e-08	2.13054e-06	ENSMUSG00000020793	14428	Galr2
ENSMUSG00000095304	6350.96	0.76917	0.142273	5.40628	6.43455e-08	2.17264e-06	ENSMUSG00000095304	211623	Plac9a
ENSMUSG00000060534	26.5291	3.85574	0.713855	5.40129	6.61647e-08	2.2297e-06	ENSMUSG00000060534	13176	Dcc
ENSMUSG00000025813	908.253	0.918875	0.170178	5.3995	6.6826e-08	2.24322e-06	ENSMUSG00000025813	26557	Homer2
ENSMUSG00000031661	514.783	1.33469	0.247544	5.3917	6.97923e-08	2.3292e-06	ENSMUSG00000031661	93960	Nkd1
ENSMUSG00000004415	1004.43	1.93681	0.35925	5.39127	6.99619e-08	2.33035e-06	ENSMUSG00000004415	140709	Col26a1
ENSMUSG00000022780	220.212	2.00079	0.374185	5.34707	8.93915e-08	2.92955e-06	ENSMUSG00000022780	30060	Meltf
ENSMUSG00000029563	3326.49	0.874325	0.163649	5.34269	9.15752e-08	2.9925e-06	ENSMUSG00000029563	114142	Foxp2
ENSMUSG00000034919	65.7535	3.15549	0.591642	5.33344	9.63716e-08	3.13735e-06	ENSMUSG00000034919	230576	Ttc22
ENSMUSG00000029207	7680.38	0.881995	0.165397	5.3326	9.68184e-08	3.14596e-06	ENSMUSG00000029207	11787	Apbb2
ENSMUSG00000090841	12343.4	0.824256	0.155143	5.3129	1.07897e-07	3.47427e-06	ENSMUSG00000090841	17904	Myl6
ENSMUSG00000021390	28764.2	0.91047	0.171869	5.29747	1.17418e-07	3.75173e-06	ENSMUSG00000021390	18295	Ogn
ENSMUSG00000021708	208.216	1.92684	0.363955	5.29418	1.19552e-07	3.81286e-06	ENSMUSG00000021708	19418	Rasgrf2
ENSMUSG00000015957	96.3485	2.55015	0.482124	5.2894	1.22718e-07	3.90661e-06	ENSMUSG00000015957	22411	Wnt11
ENSMUSG00000026674	15932.5	0.846612	0.16067	5.26925	1.3698e-07	4.32866e-06	ENSMUSG00000026674	18214	Ddr2
ENSMUSG00000043924	161.921	1.61005	0.306	5.26159	1.42812e-07	4.49269e-06	ENSMUSG00000043924	230822	Ncmap
ENSMUSG00000028944	512.986	1.201	0.228266	5.26141	1.42952e-07	4.49269e-06	ENSMUSG00000028944	108099	Prkag2
ENSMUSG00000055148	3814.97	1.00436	0.191017	5.25795	1.45671e-07	4.56154e-06	ENSMUSG00000055148	16598	Klf2
ENSMUSG00000036242	1432.33	0.971148	0.185026	5.24871	1.53171e-07	4.78769e-06	ENSMUSG00000036242	67419	Armh4
ENSMUSG00000021388	25799.5	1.01544	0.193504	5.24767	1.54034e-07	4.80597e-06	ENSMUSG00000021388	66695	Aspn
ENSMUSG00000050830	25.9062	6.73425	1.28347	5.2469	1.54679e-07	4.81739e-06	ENSMUSG00000050830	319922	Vwc2
ENSMUSG00000105366	262.363	1.34338	0.257627	5.21445	1.84363e-07	5.70072e-06	ENSMUSG00000105366	NA	Gm43719
ENSMUSG00000036560	134.397	1.88809	0.362538	5.20798	1.90902e-07	5.88306e-06	ENSMUSG00000036560	243914	Lgi4
ENSMUSG00000057060	14.1382	7.33083	1.40816	5.20596	1.93e-07	5.92529e-06	ENSMUSG00000057060	210027	Slc35f3
ENSMUSG00000010142	68.59	4.94296	0.950312	5.20141	1.97785e-07	6.05069e-06	ENSMUSG00000010142	57916	Tnfrsf13b
ENSMUSG00000030554	1084.63	0.949614	0.182837	5.19376	2.06087e-07	6.2935e-06	ENSMUSG00000030554	233335	Synm
ENSMUSG00000038204	23.2243	5.92159	1.14191	5.18568	2.15225e-07	6.53784e-06	ENSMUSG00000038204	117590	Asb10
ENSMUSG00000019124	1791.07	0.942201	0.181984	5.17739	2.25012e-07	6.82313e-06	ENSMUSG00000019124	69938	Scrn1
ENSMUSG00000022265	1719.21	0.719634	0.139073	5.1745	2.28519e-07	6.9173e-06	ENSMUSG00000022265	11732	Ank
ENSMUSG00000020176	10664.9	0.568205	0.109963	5.16722	2.37605e-07	7.17974e-06	ENSMUSG00000020176	14783	Grb10
ENSMUSG00000014361	1235.52	1.16976	0.226753	5.15876	2.48591e-07	7.48551e-06	ENSMUSG00000014361	17289	Mertk
ENSMUSG00000025789	350.017	1.52174	0.295119	5.15638	2.51766e-07	7.55474e-06	ENSMUSG00000025789	20450	St8sia2
ENSMUSG00000038576	176.418	1.56064	0.302651	5.15657	2.51517e-07	7.55474e-06	ENSMUSG00000038576	96935	Susd4
ENSMUSG00000029134	132.028	1.72116	0.333972	5.15359	2.55541e-07	7.65468e-06	ENSMUSG00000029134	665270	Plb1
ENSMUSG00000001300	3399.06	0.75808	0.14733	5.14544	2.66888e-07	7.98073e-06	ENSMUSG00000001300	13642	Efnb2
ENSMUSG00000055799	3249.18	0.638488	0.124107	5.14464	2.68029e-07	8.001e-06	ENSMUSG00000055799	21415	Tcf7l1
ENSMUSG00000001240	464.93	1.18762	0.231087	5.13927	2.75804e-07	8.21885e-06	ENSMUSG00000001240	54409	Ramp2
ENSMUSG00000030737	43.9749	4.4886	0.876973	5.11829	3.08321e-07	9.10918e-06	ENSMUSG00000030737	101488	Slco2b1
ENSMUSG00000042104	351.842	0.953528	0.18716	5.09471	3.49276e-07	1.02665e-05	ENSMUSG00000042104	66435	Uggt2
ENSMUSG00000039987	335.043	1.03689	0.203657	5.09137	3.55485e-07	1.04312e-05	ENSMUSG00000039987	68770	Phtf2
ENSMUSG00000034755	69.3383	2.3989	0.473126	5.07032	3.97151e-07	1.16214e-05	ENSMUSG00000034755	245578	Pcdh11x
ENSMUSG00000060402	944.658	1.03614	0.204995	5.05445	4.31629e-07	1.25587e-05	ENSMUSG00000060402	68947	Chst8
ENSMUSG00000020566	501.545	1.31089	0.259821	5.04535	4.52686e-07	1.31272e-05	ENSMUSG00000020566	68775	Atp6v1c2
ENSMUSG00000058806	17.6346	6.46644	1.28381	5.03691	4.73112e-07	1.36964e-05	ENSMUSG00000058806	12817	Col13a1
ENSMUSG00000032841	497.783	1.78254	0.35477	5.02451	5.04718e-07	1.44898e-05	ENSMUSG00000032841	72446	Prr5l
ENSMUSG00000058135	2245.06	0.692236	0.138024	5.01533	5.29423e-07	1.51739e-05	ENSMUSG00000058135	14862	Gstm1
ENSMUSG00000039153	1305.65	0.681223	0.136023	5.00815	5.49559e-07	1.57249e-05	ENSMUSG00000039153	12393	Runx2
ENSMUSG00000087075	44.3439	3.96169	0.793781	4.99092	6.00928e-07	1.70814e-05	ENSMUSG00000087075	380787	Lbhd2
ENSMUSG00000036295	499.663	1.19981	0.240563	4.98752	6.116e-07	1.72709e-05	ENSMUSG00000036295	16981	Lrrn3
ENSMUSG00000034353	187.44	1.86928	0.375111	4.98328	6.25149e-07	1.75959e-05	ENSMUSG00000034353	51801	Ramp1
ENSMUSG00000034109	5039.71	0.589195	0.118364	4.97782	6.43044e-07	1.80702e-05	ENSMUSG00000034109	73124	Golim4
ENSMUSG00000087521	23.6409	6.293	1.26621	4.96995	6.69717e-07	1.87586e-05	ENSMUSG00000087521	99041	AI646519
ENSMUSG00000027365	2642.34	0.647392	0.130343	4.96685	6.80496e-07	1.90296e-05	ENSMUSG00000027365	58800	Trpm7
ENSMUSG00000049606	2335.92	0.682298	0.137653	4.95666	7.17154e-07	1.99899e-05	ENSMUSG00000049606	52397	Zfp644
ENSMUSG00000034910	1368.76	0.67787	0.137255	4.93878	7.86128e-07	2.1842e-05	ENSMUSG00000034910	72135	Pygo1
ENSMUSG00000042284	3792.97	0.832005	0.168646	4.93346	8.07879e-07	2.24102e-05	ENSMUSG00000042284	109700	Itga1
ENSMUSG00000005148	1303.09	0.718133	0.145994	4.91893	8.70179e-07	2.40996e-05	ENSMUSG00000005148	12224	Klf5
ENSMUSG00000027447	71054.6	1.20462	0.24519	4.91301	8.96883e-07	2.47597e-05	ENSMUSG00000027447	13010	Cst3
ENSMUSG00000030669	162.93	1.80768	0.368177	4.90983	9.11568e-07	2.51249e-05	ENSMUSG00000030669	12310	Calca
ENSMUSG00000020486	145.384	1.92633	0.394831	4.87885	1.06704e-06	2.93631e-05	ENSMUSG00000020486	18952	Septin4
ENSMUSG00000030329	28.8081	4.44116	0.913889	4.85963	1.17604e-06	3.23111e-05	ENSMUSG00000030329	319352	Pianp
ENSMUSG00000059498	1040.82	1.23212	0.25371	4.85642	1.19524e-06	3.27866e-05	ENSMUSG00000059498	14131	Fcgr3
ENSMUSG00000031930	3364.63	0.913503	0.188319	4.85082	1.22954e-06	3.36738e-05	ENSMUSG00000031930	66894	Wwp2
ENSMUSG00000030409	1026.41	0.89359	0.184801	4.83542	1.32863e-06	3.633e-05	ENSMUSG00000030409	13400	Dmpk
ENSMUSG00000040729	137.434	1.86702	0.386143	4.83505	1.33112e-06	3.63404e-05	ENSMUSG00000040729	234915	Cep126
ENSMUSG00000096210	4332.91	0.637025	0.131791	4.83361	1.34076e-06	3.65447e-05	ENSMUSG00000096210	14958	H1f0
ENSMUSG00000049313	303.8	1.23422	0.256496	4.81186	1.49529e-06	4.05655e-05	ENSMUSG00000049313	20660	Sorl1
ENSMUSG00000041075	1094.16	1.1084	0.230932	4.79969	1.58911e-06	4.27747e-05	ENSMUSG00000041075	14369	Fzd7
ENSMUSG00000074207	101.177	2.13734	0.445605	4.79648	1.61478e-06	4.33304e-05	ENSMUSG00000074207	11522	Adh1
ENSMUSG00000036596	232.515	1.55419	0.324684	4.78679	1.69466e-06	4.53328e-05	ENSMUSG00000036596	242939	Cpz
ENSMUSG00000050556	202.366	1.39471	0.291683	4.78159	1.73917e-06	4.64513e-05	ENSMUSG00000050556	16500	Kcnb1
ENSMUSG00000022687	4953.02	0.778725	0.163149	4.77308	1.81429e-06	4.80856e-05	ENSMUSG00000022687	117606	Boc
ENSMUSG00000032537	110.848	2.1994	0.462215	4.7584	1.95137e-06	5.14817e-05	ENSMUSG00000032537	270190	Ephb1
ENSMUSG00000019647	468.414	1.03187	0.216943	4.75641	1.97066e-06	5.19111e-05	ENSMUSG00000019647	20358	Sema6a
ENSMUSG00000066705	333.564	1.44932	0.305221	4.74841	2.05023e-06	5.374e-05	ENSMUSG00000066705	59095	Fxyd6
ENSMUSG00000097451	1255.68	0.876138	0.184521	4.74818	2.05255e-06	5.374e-05	ENSMUSG00000097451	NA	Rian
ENSMUSG00000031347	1821.63	0.599395	0.126278	4.74665	2.06811e-06	5.40655e-05	ENSMUSG00000031347	26370	Cetn2
ENSMUSG00000005320	40.0183	3.18649	0.671794	4.74325	2.10316e-06	5.48156e-05	ENSMUSG00000005320	14186	Fgfr4
ENSMUSG00000028496	3056.7	0.646697	0.136408	4.74089	2.12784e-06	5.52919e-05	ENSMUSG00000028496	70122	Mllt3
ENSMUSG00000024526	20.6497	5.85201	1.23469	4.73965	2.14087e-06	5.54633e-05	ENSMUSG00000024526	12683	Cidea
ENSMUSG00000022371	1419.41	1.41105	0.297961	4.73569	2.18311e-06	5.63039e-05	ENSMUSG00000022371	12818	Col14a1
ENSMUSG00000032356	25.3268	6.09112	1.28685	4.73334	2.20852e-06	5.68744e-05	ENSMUSG00000032356	19417	Rasgrf1
ENSMUSG00000047496	68.7753	2.91487	0.61619	4.73048	2.23994e-06	5.75974e-05	ENSMUSG00000047496	320311	Rnf152
ENSMUSG00000030122	8012.89	0.576399	0.121972	4.72567	2.29355e-06	5.88883e-05	ENSMUSG00000030122	69202	Ptms
ENSMUSG00000014602	732.774	1.03128	0.218449	4.72091	2.34793e-06	6.01948e-05	ENSMUSG00000014602	16560	Kif1a
ENSMUSG00000057880	746.066	0.806052	0.170844	4.71807	2.38098e-06	6.09516e-05	ENSMUSG00000057880	268860	Abat
ENSMUSG00000042644	1054.67	0.949071	0.201223	4.7165	2.39933e-06	6.13303e-05	ENSMUSG00000042644	16440	Itpr3
ENSMUSG00000015533	2960.8	2.30032	0.48872	4.70684	2.51588e-06	6.39308e-05	ENSMUSG00000015533	16398	Itga2
ENSMUSG00000075012	170.913	1.64053	0.348658	4.70526	2.53544e-06	6.4333e-05	ENSMUSG00000075012	14221	Fjx1
ENSMUSG00000025856	4320.71	0.649017	0.138179	4.69693	2.64095e-06	6.68136e-05	ENSMUSG00000025856	18590	Pdgfa
ENSMUSG00000033060	6010.09	0.685976	0.146233	4.69098	2.71903e-06	6.86884e-05	ENSMUSG00000033060	380928	Lmo7
ENSMUSG00000024998	1150.14	0.883519	0.188509	4.68687	2.77409e-06	6.98745e-05	ENSMUSG00000024998	74055	Plce1
ENSMUSG00000076617	50.5163	3.06869	0.655176	4.68376	2.81661e-06	7.08423e-05	ENSMUSG00000076617	NA	Ighm
ENSMUSG00000041272	3396.09	0.682046	0.145961	4.67281	2.97114e-06	7.44077e-05	ENSMUSG00000041272	252838	Tox
ENSMUSG00000048399	69.6218	2.10199	0.449836	4.67279	2.97131e-06	7.44077e-05	ENSMUSG00000048399	71338	Tprg
ENSMUSG00000018427	742.795	1.00354	0.214845	4.67102	2.99703e-06	7.49432e-05	ENSMUSG00000018427	77864	Ypel2
ENSMUSG00000022229	41.8041	4.35898	0.934062	4.66669	3.06094e-06	7.64305e-05	ENSMUSG00000022229	192113	Atp12a
ENSMUSG00000087022	185.124	1.56192	0.334771	4.66563	3.07678e-06	7.67151e-05	ENSMUSG00000087022	329160	9130024F11Rik
ENSMUSG00000033863	5857.91	0.689405	0.147936	4.66015	3.15975e-06	7.86701e-05	ENSMUSG00000033863	16601	Klf9
ENSMUSG00000039462	108.628	2.02306	0.434527	4.65578	3.22754e-06	8.01267e-05	ENSMUSG00000039462	12813	Col10a1
ENSMUSG00000078122	35.1951	6.46647	1.3929	4.64245	3.44297e-06	8.52295e-05	ENSMUSG00000078122	100038363	F630028O10Rik
ENSMUSG00000086542	18.6713	6.03737	1.30167	4.63819	3.51481e-06	8.6704e-05	ENSMUSG00000086542	NA	Gm13782
ENSMUSG00000064310	18.9382	5.09809	1.09977	4.63558	3.5594e-06	8.7609e-05	ENSMUSG00000064310	239852	Zpld1
ENSMUSG00000020846	3689.68	0.668946	0.14439	4.63293	3.60528e-06	8.86119e-05	ENSMUSG00000020846	76566	Rflnb
ENSMUSG00000067279	679.996	1.27896	0.276493	4.62564	3.7344e-06	9.15245e-05	ENSMUSG00000067279	53412	Ppp1r3c
ENSMUSG00000014158	521.276	0.899794	0.194616	4.62343	3.77453e-06	9.23769e-05	ENSMUSG00000014158	63873	Trpv4
ENSMUSG00000021983	70.3843	3.14743	0.681142	4.62081	3.82238e-06	9.32835e-05	ENSMUSG00000021983	50769	Atp8a2
ENSMUSG00000022206	5901.44	0.641311	0.139654	4.59214	4.38725e-06	0.000106019	ENSMUSG00000022206	18162	Npr3
ENSMUSG00000041592	271.18	1.32745	0.289734	4.58162	4.61395e-06	0.000111186	ENSMUSG00000041592	237979	Sdk2
ENSMUSG00000058254	521.456	1.37098	0.300014	4.56972	4.88367e-06	0.000117194	ENSMUSG00000058254	21912	Tspan7
ENSMUSG00000039477	4200.96	0.739147	0.16178	4.56884	4.90422e-06	0.000117515	ENSMUSG00000039477	231861	Tnrc18
ENSMUSG00000049775	54052.9	0.777906	0.170355	4.56639	4.96201e-06	0.000118416	ENSMUSG00000049775	19241	Tmsb4x
ENSMUSG00000035258	43194.8	0.736728	0.161606	4.5588	5.1447e-06	0.000122437	ENSMUSG00000035258	320712	Abi3bp
ENSMUSG00000027500	3125.17	0.952851	0.209225	4.55419	5.25878e-06	0.000124807	ENSMUSG00000027500	20257	Stmn2
ENSMUSG00000001349	6976.99	0.681907	0.14991	4.54878	5.39587e-06	0.000127885	ENSMUSG00000001349	12797	Cnn1
ENSMUSG00000040010	463.104	1.10416	0.242825	4.54713	5.43811e-06	0.000128709	ENSMUSG00000040010	20539	Slc7a5
ENSMUSG00000074259	39.2544	2.82532	0.622069	4.54181	5.57737e-06	0.000131825	ENSMUSG00000074259	546134	Gramd2
ENSMUSG00000018774	1252.4	1.55085	0.342085	4.53352	5.80089e-06	0.00013692	ENSMUSG00000018774	12514	Cd68
ENSMUSG00000022812	7333.13	0.658102	0.145766	4.51478	6.33825e-06	0.000149113	ENSMUSG00000022812	56637	Gsk3b
ENSMUSG00000022665	31942.9	0.660981	0.146409	4.51461	6.34341e-06	0.000149113	ENSMUSG00000022665	67896	Ccdc80
ENSMUSG00000048120	150.365	1.53413	0.339864	4.51395	6.36318e-06	0.000149375	ENSMUSG00000048120	12495	Entpd1
ENSMUSG00000000247	67.2011	2.50401	0.55535	4.50888	6.51706e-06	0.000152572	ENSMUSG00000000247	16870	Lhx2
ENSMUSG00000054863	965.385	1.08756	0.24153	4.50282	6.70563e-06	0.00015635	ENSMUSG00000054863	106014	Tafa5
ENSMUSG00000031465	237.875	1.61785	0.360128	4.49242	7.04178e-06	0.000163337	ENSMUSG00000031465	11601	Angpt2
ENSMUSG00000033022	3516.31	0.709094	0.157844	4.49238	7.04317e-06	0.000163337	ENSMUSG00000033022	12583	Cdo1
ENSMUSG00000029838	32032.5	0.785632	0.174976	4.48995	7.1241e-06	0.000164771	ENSMUSG00000029838	19242	Ptn
ENSMUSG00000104017	19.4082	6.26527	1.39784	4.48211	7.39074e-06	0.000170481	ENSMUSG00000104017	NA	Gm37363
ENSMUSG00000044006	189.797	1.78339	0.399199	4.46743	7.91642e-06	0.000181636	ENSMUSG00000044006	68709	Cilp2
ENSMUSG00000097640	243.901	1.35553	0.303546	4.46564	7.98307e-06	0.000182921	ENSMUSG00000097640	NA	Gm20033
ENSMUSG00000038205	915.502	0.684065	0.153212	4.46483	8.01314e-06	0.000183124	ENSMUSG00000038205	108097	Prkab2
ENSMUSG00000026258	376.136	4.0602	0.909958	4.46197	8.12111e-06	0.000185101	ENSMUSG00000026258	73234	Snorc
ENSMUSG00000035407	266.114	1.54865	0.347782	4.45294	8.4702e-06	0.000192296	ENSMUSG00000035407	242553	Kank4
ENSMUSG00000045333	437.163	0.9915	0.222739	4.45141	8.53094e-06	0.00019342	ENSMUSG00000045333	94187	Zfp423
ENSMUSG00000047842	37.7709	3.16133	0.710411	4.45	8.58688e-06	0.000194433	ENSMUSG00000047842	68203	Diras2
ENSMUSG00000060002	1536.24	0.815907	0.183483	4.44677	8.71706e-06	0.000196864	ENSMUSG00000060002	212862	Chpt1
ENSMUSG00000030255	3320.99	0.514651	0.115957	4.43828	9.06807e-06	0.000203119	ENSMUSG00000030255	16651	Sspn
ENSMUSG00000034295	137.684	2.17738	0.490658	4.43768	9.09329e-06	0.000203233	ENSMUSG00000034295	225288	Fhod3
ENSMUSG00000019102	88.4107	1.705	0.384439	4.43502	9.20637e-06	0.000205228	ENSMUSG00000019102	11670	Aldh3a1
ENSMUSG00000027523	362.682	0.859877	0.194329	4.42484	9.65122e-06	0.000214314	ENSMUSG00000027523	14683	Gnas
ENSMUSG00000005268	102.244	1.94147	0.439784	4.41461	1.01193e-05	0.000223845	ENSMUSG00000005268	19116	Prlr
ENSMUSG00000020032	5808.52	0.729073	0.165196	4.41337	1.01774e-05	0.000224841	ENSMUSG00000020032	77976	Nuak1
ENSMUSG00000055214	3397.12	0.888481	0.201371	4.41215	1.02347e-05	0.000225818	ENSMUSG00000055214	319455	Pld5
ENSMUSG00000026728	71486.9	0.459681	0.104593	4.39495	1.10797e-05	0.000243527	ENSMUSG00000026728	22352	Vim
ENSMUSG00000030237	76.0164	2.9284	0.668154	4.38281	1.17156e-05	0.000256364	ENSMUSG00000030237	28250	Slco1a4
ENSMUSG00000002831	215.248	1.30625	0.298021	4.38307	1.17018e-05	0.000256364	ENSMUSG00000002831	57435	Plin4
ENSMUSG00000022528	1966.29	0.704196	0.160935	4.37566	1.21064e-05	0.00026341	ENSMUSG00000022528	15205	Hes1
ENSMUSG00000048096	3504.51	0.914232	0.209019	4.37391	1.2204e-05	0.000265199	ENSMUSG00000048096	93689	Lmod1
ENSMUSG00000040037	774.46	0.702188	0.16062	4.37175	1.23255e-05	0.00026688	ENSMUSG00000040037	320840	Negr1
ENSMUSG00000100320	107.211	1.87938	0.42992	4.37146	1.23418e-05	0.000266881	ENSMUSG00000100320	NA	Gm29417
ENSMUSG00000064366	137.443	1.25548	0.287328	4.3695	1.24531e-05	0.000268583	ENSMUSG00000064366	NA	mt-Tl2
ENSMUSG00000007888	7258.89	0.501815	0.114896	4.36754	1.25651e-05	0.000270659	ENSMUSG00000007888	12931	Crlf1
ENSMUSG00000045215	126.957	1.75448	0.40181	4.36645	1.2628e-05	0.000271337	ENSMUSG00000045215	211961	Asxl3
ENSMUSG00000028988	5870.81	0.60415	0.138492	4.36235	1.28673e-05	0.00027545	ENSMUSG00000028988	67087	Ctnnbip1
ENSMUSG00000023904	7387.44	0.60388	0.138505	4.35999	1.30069e-05	0.000277406	ENSMUSG00000023904	353502	Hcfc1r1
ENSMUSG00000045636	215.371	1.73252	0.398127	4.35167	1.35107e-05	0.000287794	ENSMUSG00000045636	102103	Mtus1
ENSMUSG00000046668	3157.63	0.686066	0.158289	4.33426	1.46254e-05	0.000309628	ENSMUSG00000046668	67393	Cxxc5
ENSMUSG00000042312	3818.03	0.547472	0.126334	4.33354	1.46729e-05	0.000309872	ENSMUSG00000042312	20196	S100a13
ENSMUSG00000063130	10.8882	6.04506	1.39487	4.33378	1.4657e-05	0.000309872	ENSMUSG00000063130	70405	Calml3
ENSMUSG00000000058	1060.15	0.815692	0.188579	4.32546	1.52212e-05	0.00032106	ENSMUSG00000000058	12390	Cav2
ENSMUSG00000024008	29.2533	4.32808	1.00127	4.32262	1.54189e-05	0.000324041	ENSMUSG00000024008	240058	Cpne5
ENSMUSG00000035168	2049.33	0.693995	0.160686	4.31896	1.56768e-05	0.00032866	ENSMUSG00000035168	66860	Tanc1
ENSMUSG00000044026	365.355	1.58758	0.367839	4.31595	1.58916e-05	0.000332759	ENSMUSG00000044026	240660	Slc35g1
ENSMUSG00000032649	126.27	2.30626	0.534529	4.31455	1.59926e-05	0.000334403	ENSMUSG00000032649	269132	Colgalt2
ENSMUSG00000042453	387.144	1.50746	0.349408	4.31433	1.60088e-05	0.000334403	ENSMUSG00000042453	19699	Reln
ENSMUSG00000037795	829.534	0.71747	0.166419	4.31123	1.62352e-05	0.000338721	ENSMUSG00000037795	333789	N4bp2
ENSMUSG00000105867	52.6433	1.97765	0.46051	4.29449	1.75096e-05	0.000364429	ENSMUSG00000105867	115490131	Gm42517
ENSMUSG00000020061	31.5774	3.3384	0.777471	4.29392	1.75543e-05	0.000364479	ENSMUSG00000020061	109272	Mybpc1
ENSMUSG00000049225	1284.92	0.770181	0.179529	4.29002	1.78661e-05	0.000370507	ENSMUSG00000049225	381511	Pdp1
ENSMUSG00000021767	948.034	0.699445	0.163219	4.28531	1.82485e-05	0.000377983	ENSMUSG00000021767	54169	Kat6b
ENSMUSG00000017485	5292.2	0.64638	0.151013	4.28028	1.86659e-05	0.000385701	ENSMUSG00000017485	21974	Top2b
ENSMUSG00000046523	101.762	1.78438	0.416911	4.28001	1.86886e-05	0.00038571	ENSMUSG00000046523	67516	Kctd4
ENSMUSG00000025795	1186.99	0.950793	0.222189	4.2792	1.87563e-05	0.000386645	ENSMUSG00000025795	192678	Rassf3
ENSMUSG00000042595	564.004	0.756187	0.176838	4.27617	1.90139e-05	0.00039102	ENSMUSG00000042595	245622	Fam199x
ENSMUSG00000022415	127.997	1.5328	0.359801	4.26013	2.04309e-05	0.000419161	ENSMUSG00000022415	20972	Syngr1
ENSMUSG00000020573	179.348	2.01726	0.474857	4.24814	2.15553e-05	0.000440658	ENSMUSG00000020573	30955	Pik3cg
ENSMUSG00000032492	2017.45	1.12208	0.264429	4.24339	2.20165e-05	0.000449022	ENSMUSG00000032492	19228	Pth1r
ENSMUSG00000030862	2863.89	0.752588	0.177574	4.23816	2.25355e-05	0.000458524	ENSMUSG00000030862	55987	Cpxm2
ENSMUSG00000084875	70.309	2.13426	0.50387	4.23574	2.27801e-05	0.000462954	ENSMUSG00000084875	NA	4930570D08Rik
ENSMUSG00000032348	490.546	1.17628	0.278296	4.22673	2.37113e-05	0.000478497	ENSMUSG00000032348	14860	Gsta4
ENSMUSG00000039701	1318.66	0.747524	0.176923	4.22514	2.38788e-05	0.000481315	ENSMUSG00000039701	99526	Usp53
ENSMUSG00000041153	485.064	1.14585	0.271588	4.21906	2.45325e-05	0.000493337	ENSMUSG00000041153	209212	Osgin2
ENSMUSG00000024500	38.1655	2.79675	0.663325	4.21626	2.48393e-05	0.000497768	ENSMUSG00000024500	72930	Ppp2r2b
ENSMUSG00000031563	6243.78	0.560972	0.133285	4.20883	2.56701e-05	0.000512629	ENSMUSG00000031563	52357	Wwc2
ENSMUSG00000027452	39.7994	4.46715	1.06238	4.20486	2.61248e-05	0.000520504	ENSMUSG00000027452	68738	Acss1
ENSMUSG00000031737	1910.72	0.74105	0.176361	4.20189	2.64695e-05	0.000525551	ENSMUSG00000031737	54352	Irx5
ENSMUSG00000032060	4449.96	0.5191	0.123591	4.20015	2.66737e-05	0.000528998	ENSMUSG00000032060	12955	Cryab
ENSMUSG00000072294	292.95	1.00515	0.240016	4.18784	2.81618e-05	0.00055659	ENSMUSG00000072294	16597	Klf12
ENSMUSG00000057522	3783.01	0.575993	0.137646	4.1846	2.85673e-05	0.000563959	ENSMUSG00000057522	20747	Spop
ENSMUSG00000045414	1721.84	0.605734	0.144781	4.18379	2.86687e-05	0.000565314	ENSMUSG00000045414	68861	Dipk2a
ENSMUSG00000105322	25.9285	3.02814	0.724053	4.18221	2.88688e-05	0.00056861	ENSMUSG00000105322	NA	Gm43751
ENSMUSG00000021991	54.9984	2.64484	0.632815	4.17948	2.92176e-05	0.000574169	ENSMUSG00000021991	12294	Cacna2d3
ENSMUSG00000115783	2233.4	0.973694	0.233127	4.17667	2.95811e-05	0.000579991	ENSMUSG00000115783	100568459	Bc1
ENSMUSG00000068747	624.046	0.886349	0.212667	4.16778	3.07584e-05	0.000599667	ENSMUSG00000068747	20661	Sort1
ENSMUSG00000030852	1850.58	0.494421	0.118641	4.16737	3.0814e-05	0.000600074	ENSMUSG00000030852	57752	Tacc2
ENSMUSG00000031891	39.8367	4.26881	1.02453	4.16659	3.09196e-05	0.000601451	ENSMUSG00000031891	15484	Hsd11b2
ENSMUSG00000020297	10.3463	6.16845	1.48113	4.16469	3.11783e-05	0.000605118	ENSMUSG00000020297	18197	Nsg2
ENSMUSG00000043881	330.351	0.871509	0.209279	4.16434	3.12259e-05	0.000605361	ENSMUSG00000043881	211255	Kbtbd7
ENSMUSG00000039419	108.747	1.82828	0.439153	4.1632	3.13821e-05	0.000607707	ENSMUSG00000039419	66797	Cntnap2
ENSMUSG00000032556	17.2381	5.61625	1.34938	4.1621	3.15339e-05	0.00060977	ENSMUSG00000032556	107993	Bfsp2
ENSMUSG00000099655	58.8852	1.85417	0.44564	4.16069	3.17281e-05	0.000612345	ENSMUSG00000099655	NA	2310034G01Rik
ENSMUSG00000061311	184.073	4.30903	1.03948	4.14536	3.39279e-05	0.000653339	ENSMUSG00000061311	19373	Rag1
ENSMUSG00000055761	31.5613	4.27449	1.03157	4.14367	3.41785e-05	0.000657432	ENSMUSG00000055761	269513	Nkain3
ENSMUSG00000028581	1664.19	1.3137	0.317781	4.13396	3.56558e-05	0.000683499	ENSMUSG00000028581	16792	Laptm5
ENSMUSG00000030342	3506.79	0.509592	0.123338	4.13169	3.60113e-05	0.000688845	ENSMUSG00000030342	12527	Cd9
ENSMUSG00000048572	419.24	1.13089	0.274129	4.1254	3.70086e-05	0.000705576	ENSMUSG00000048572	226040	Tmem252
ENSMUSG00000002266	165.094	2.19947	0.533698	4.12118	3.7693e-05	0.00071704	ENSMUSG00000002266	22776	Zim1
ENSMUSG00000046807	1071.47	0.782987	0.190347	4.11347	3.8976e-05	0.000738596	ENSMUSG00000046807	192734	Lrrc75b
ENSMUSG00000022223	14.9458	4.6484	1.13008	4.11334	3.89974e-05	0.000738596	ENSMUSG00000022223	654795	Sdr39u1
ENSMUSG00000039155	81.5266	1.83887	0.447723	4.10716	4.00555e-05	0.000756975	ENSMUSG00000039155	381409	Cdh26
ENSMUSG00000115301	46.7569	3.11832	0.759323	4.10671	4.01335e-05	0.000757619	ENSMUSG00000115301	NA	Gm6330
ENSMUSG00000052656	618.753	0.712922	0.173775	4.10256	4.08603e-05	0.000768412	ENSMUSG00000052656	22644	Rnf103
ENSMUSG00000025978	864.552	0.650745	0.158738	4.0995	4.1405e-05	0.000777368	ENSMUSG00000025978	74013	Rftn2
ENSMUSG00000033610	968.167	0.762956	0.186835	4.08358	4.43472e-05	0.000829899	ENSMUSG00000033610	75735	Pank1
ENSMUSG00000103076	17.75	4.51637	1.10664	4.08117	4.48099e-05	0.000837649	ENSMUSG00000103076	NA	Gm37902
ENSMUSG00000023845	1352.43	0.560135	0.137477	4.07439	4.61358e-05	0.000857787	ENSMUSG00000023845	240028	Lnpep
ENSMUSG00000047139	1148.83	0.730274	0.179553	4.06718	4.75856e-05	0.000883791	ENSMUSG00000047139	12484	Cd24a
ENSMUSG00000066571	956.788	0.898541	0.220941	4.06689	4.76442e-05	0.000883929	ENSMUSG00000066571	233103	Garre1
ENSMUSG00000029651	623.842	0.977882	0.240556	4.06509	4.80147e-05	0.000889845	ENSMUSG00000029651	77521	Mtus2
ENSMUSG00000051043	490.617	0.794421	0.195586	4.06174	4.87089e-05	0.000901742	ENSMUSG00000051043	70355	Gprc5c
ENSMUSG00000042807	102.185	1.64091	0.404046	4.06121	4.882e-05	0.00090283	ENSMUSG00000042807	329152	Hecw2
ENSMUSG00000037071	2696.11	0.528564	0.130162	4.06083	4.88978e-05	0.000903301	ENSMUSG00000037071	20249	Scd1
ENSMUSG00000096971	228.32	1.11261	0.274239	4.05706	4.96936e-05	0.000916041	ENSMUSG00000096971	75259	4930556M19Rik
ENSMUSG00000045193	1015.22	0.648576	0.160389	4.04378	5.25973e-05	0.000963391	ENSMUSG00000045193	12696	Cirbp
ENSMUSG00000025278	6187.79	0.981493	0.243448	4.03163	5.53919e-05	0.00100816	ENSMUSG00000025278	286940	Flnb
ENSMUSG00000025958	2095.11	0.55643	0.138067	4.03016	5.57398e-05	0.00101342	ENSMUSG00000025958	12912	Creb1
ENSMUSG00000040855	37.5304	2.57655	0.639853	4.02679	5.65441e-05	0.00102696	ENSMUSG00000040855	194590	Reps2
ENSMUSG00000017291	8664.02	0.68804	0.171186	4.01926	5.83825e-05	0.00105842	ENSMUSG00000017291	216965	Taok1
ENSMUSG00000036867	718.754	0.726954	0.180964	4.01711	5.89165e-05	0.00106668	ENSMUSG00000036867	17130	Smad6
ENSMUSG00000001986	3359.32	0.474031	0.118109	4.01351	5.98228e-05	0.00108082	ENSMUSG00000001986	53623	Gria3
ENSMUSG00000040732	2121.64	0.582441	0.145315	4.00813	6.12019e-05	0.00110112	ENSMUSG00000040732	13876	Erg
ENSMUSG00000002565	47.9919	3.53504	0.883242	4.00235	6.27166e-05	0.00112386	ENSMUSG00000002565	20259	Scin
ENSMUSG00000041313	922.572	0.624632	0.156121	4.00094	6.30902e-05	0.00112921	ENSMUSG00000041313	11987	Slc7a1
ENSMUSG00000030208	5716.31	0.65276	0.163324	3.99673	6.42241e-05	0.00114475	ENSMUSG00000030208	13730	Emp1
ENSMUSG00000031097	28.9217	5.26623	1.3206	3.98774	6.67061e-05	0.0011841	ENSMUSG00000031097	21953	Tnni2
ENSMUSG00000026483	1707.61	0.68727	0.172395	3.98661	6.70237e-05	0.00118784	ENSMUSG00000026483	63913	Niban1
ENSMUSG00000033768	335.024	1.03349	0.259508	3.9825	6.81932e-05	0.00120554	ENSMUSG00000033768	18190	Nrxn2
ENSMUSG00000027896	278.651	1.27337	0.320148	3.97743	6.96641e-05	0.00122777	ENSMUSG00000027896	229699	Slc16a4
ENSMUSG00000045777	485.201	0.723873	0.181992	3.97749	6.96471e-05	0.00122777	ENSMUSG00000045777	320802	Ifitm10
ENSMUSG00000040260	348.226	1.15327	0.290066	3.9759	7.01144e-05	0.00123416	ENSMUSG00000040260	76441	Daam2
ENSMUSG00000045658	2113.07	0.938889	0.236197	3.97502	7.03743e-05	0.0012365	ENSMUSG00000045658	98496	Pid1
ENSMUSG00000034041	44.0031	3.97933	1.00157	3.97308	7.09504e-05	0.00124535	ENSMUSG00000034041	17095	Lyl1
ENSMUSG00000045975	451.979	0.809264	0.203823	3.97042	7.17458e-05	0.00125675	ENSMUSG00000045975	207781	C2cd2
ENSMUSG00000023232	272.563	1.34476	0.33951	3.96088	7.46755e-05	0.00130674	ENSMUSG00000023232	230779	Serinc2
ENSMUSG00000042757	350.84	1.10169	0.278311	3.95848	7.54296e-05	0.00131727	ENSMUSG00000042757	81907	Tmem108
ENSMUSG00000040138	823.397	2.4227	0.612022	3.95853	7.5413e-05	0.00131727	ENSMUSG00000040138	17986	Ndp
ENSMUSG00000040891	51.5104	1.87891	0.474933	3.95616	7.61634e-05	0.00132874	ENSMUSG00000040891	15377	Foxa3
ENSMUSG00000089812	180.902	1.22752	0.31036	3.95516	7.64846e-05	0.00133269	ENSMUSG00000089812	NA	Gm15867
ENSMUSG00000030745	77.7206	3.06967	0.77777	3.94675	7.92185e-05	0.00137371	ENSMUSG00000030745	60504	Il21r
ENSMUSG00000053024	17.6394	5.16619	1.31264	3.93573	8.29451e-05	0.0014297	ENSMUSG00000053024	21367	Cntn2
ENSMUSG00000043556	2147.7	0.66276	0.169045	3.92062	8.83206e-05	0.00151329	ENSMUSG00000043556	448987	Fbxl7
ENSMUSG00000115381	134.827	1.50414	0.383954	3.9175	8.94728e-05	0.00152999	ENSMUSG00000115381	NA	Gm49266
ENSMUSG00000046959	34.8257	2.28879	0.584943	3.91284	9.12165e-05	0.00155672	ENSMUSG00000046959	231583	Slc26a1
ENSMUSG00000063275	1430.98	0.596011	0.152405	3.9107	9.20281e-05	0.00156903	ENSMUSG00000063275	30963	Hacd1
ENSMUSG00000040289	56.8891	1.89945	0.485824	3.90975	9.23929e-05	0.00157369	ENSMUSG00000040289	15213	Hey1
ENSMUSG00000025104	1343.6	0.557176	0.142779	3.90238	9.52522e-05	0.00161442	ENSMUSG00000025104	29877	Hdgfl3
ENSMUSG00000032679	1023.41	0.583356	0.149696	3.89694	9.74141e-05	0.00164783	ENSMUSG00000032679	12509	Cd59a
ENSMUSG00000007279	93.3665	1.77927	0.456812	3.89497	9.82129e-05	0.00165809	ENSMUSG00000007279	56788	Scube2
ENSMUSG00000063415	2762.12	0.75604	0.194169	3.89371	9.87215e-05	0.00166504	ENSMUSG00000063415	232174	Cyp26b1
ENSMUSG00000047409	1909.08	0.605135	0.155548	3.89036	0.000100097	0.00168168	ENSMUSG00000047409	69274	Ctdspl
ENSMUSG00000002104	38.917	3.35451	0.862197	3.89065	9.99744e-05	0.00168168	ENSMUSG00000002104	19400	Rapsn
ENSMUSG00000057614	764.1	0.892894	0.229574	3.88936	0.00010051	0.00168696	ENSMUSG00000057614	14677	Gnai1
ENSMUSG00000034118	2753.66	0.749643	0.192831	3.88756	0.000101259	0.00169788	ENSMUSG00000034118	22021	Tpst1
ENSMUSG00000099966	408.346	0.841043	0.21641	3.88634	0.000101767	0.00170194	ENSMUSG00000099966	NA	2810402E24Rik
ENSMUSG00000072704	2880.02	0.507708	0.130982	3.87618	0.000106109	0.00176378	ENSMUSG00000072704	381820	Smim10l1
ENSMUSG00000032741	1050.2	0.628867	0.162337	3.87384	0.000107133	0.0017791	ENSMUSG00000032741	252972	Tpcn1
ENSMUSG00000029299	27.9093	5.14387	1.32842	3.87216	0.000107873	0.00178793	ENSMUSG00000029299	27405	Abcg3
ENSMUSG00000020661	2830.91	0.743888	0.192104	3.87233	0.000107801	0.00178793	ENSMUSG00000020661	13435	Dnmt3a
ENSMUSG00000019737	70.1363	1.95961	0.506474	3.86913	0.000109225	0.00180688	ENSMUSG00000019737	233066	Syne4
ENSMUSG00000041773	4570.91	0.649122	0.167763	3.86927	0.000109163	0.00180688	ENSMUSG00000041773	13803	Enc1
ENSMUSG00000068036	1298.85	0.589854	0.152744	3.86171	0.000112597	0.00186087	ENSMUSG00000068036	17356	Afdn
ENSMUSG00000027377	12.33	4.94295	1.28027	3.86086	0.000112987	0.00186553	ENSMUSG00000027377	228576	Mall
ENSMUSG00000025140	1808.68	0.514426	0.133328	3.85835	0.000114156	0.00188303	ENSMUSG00000025140	209027	Pycr1
ENSMUSG00000101609	980.111	0.791461	0.205184	3.85732	0.000114636	0.00188752	ENSMUSG00000101609	NA	Kcnq1ot1
ENSMUSG00000026490	1575.34	0.630766	0.163525	3.8573	0.000114647	0.00188752	ENSMUSG00000026490	226751	Cdc42bpa
ENSMUSG00000028687	118.594	1.31034	0.339993	3.85402	0.000116194	0.00191117	ENSMUSG00000028687	70603	Mutyh
ENSMUSG00000051359	86.8903	1.87327	0.486112	3.85358	0.000116405	0.00191281	ENSMUSG00000051359	52589	Ncald
ENSMUSG00000018451	153.792	1.28593	0.333888	3.85138	0.000117456	0.00192093	ENSMUSG00000018451	103712	6330403K07Rik
ENSMUSG00000026304	8.42142	6.41974	1.66683	3.85147	0.000117409	0.00192093	ENSMUSG00000026304	19329	Rab17
ENSMUSG00000074457	2371.63	0.490282	0.127377	3.84908	0.000118563	0.00193538	ENSMUSG00000074457	67860	S100a16
ENSMUSG00000027227	1111.07	0.751494	0.195414	3.84565	0.000120232	0.00196077	ENSMUSG00000027227	20322	Sord
ENSMUSG00000032105	95.4477	2.37195	0.618187	3.83695	0.000124572	0.00202579	ENSMUSG00000032105	170761	Pdzd3
ENSMUSG00000057246	141.723	1.22013	0.318409	3.83195	0.000127132	0.00206547	ENSMUSG00000057246	407788	BC051142
ENSMUSG00000057719	246.175	0.870263	0.227274	3.82913	0.000128595	0.00208727	ENSMUSG00000057719	269016	Sh3rf2
ENSMUSG00000097431	947.905	0.611336	0.159806	3.82548	0.000130519	0.00211453	ENSMUSG00000097431	NA	Gm26782
ENSMUSG00000036904	1741.74	0.54946	0.143734	3.82276	0.000131965	0.00213595	ENSMUSG00000036904	14370	Fzd8
ENSMUSG00000041261	77.4424	2.11814	0.554798	3.81786	0.000134614	0.00217475	ENSMUSG00000041261	12319	Car8
ENSMUSG00000028032	2521.02	0.530507	0.13898	3.81714	0.000135009	0.00217705	ENSMUSG00000028032	23971	Papss1
ENSMUSG00000032726	19.6564	4.52534	1.18651	3.814	0.000136734	0.0022028	ENSMUSG00000032726	12163	Bmp8a
ENSMUSG00000021846	454.852	0.836217	0.21938	3.81173	0.000137996	0.00221558	ENSMUSG00000021846	93834	Peli2
ENSMUSG00000008090	5589.59	0.782889	0.205508	3.80953	0.000139231	0.00223054	ENSMUSG00000008090	116701	Fgfrl1
ENSMUSG00000087305	73.9708	1.92983	0.506841	3.80756	0.000140342	0.00224626	ENSMUSG00000087305	320312	A430035B10Rik
ENSMUSG00000032702	1074.97	0.660692	0.173618	3.80543	0.000141561	0.00226366	ENSMUSG00000032702	107351	Kank1
ENSMUSG00000046167	132.169	1.25528	0.329973	3.80418	0.000142275	0.00227298	ENSMUSG00000046167	235379	Gldn
ENSMUSG00000001911	26772.6	0.459402	0.120802	3.80293	0.000142994	0.00228235	ENSMUSG00000001911	18032	Nfix
ENSMUSG00000085260	21.6118	5.00724	1.31985	3.79379	0.000148362	0.0023593	ENSMUSG00000085260	100504121	Med9os
ENSMUSG00000020814	2374.33	0.531571	0.140364	3.78708	0.00015243	0.00242176	ENSMUSG00000020814	67622	Mxra7
ENSMUSG00000043687	214.481	1.12772	0.297813	3.78667	0.000152679	0.00242348	ENSMUSG00000043687	68918	1190005I06Rik
ENSMUSG00000034320	2020.6	0.637341	0.168372	3.78531	0.000153517	0.0024323	ENSMUSG00000034320	13521	Slc26a2
ENSMUSG00000109088	137.694	1.57381	0.415865	3.78441	0.000154074	0.00243889	ENSMUSG00000109088	NA	Gm44593
ENSMUSG00000006362	12.0963	5.90209	1.55989	3.78365	0.000154547	0.00244413	ENSMUSG00000006362	12398	Cbfa2t3
ENSMUSG00000073002	1206.38	0.611502	0.161671	3.78238	0.000155338	0.00244991	ENSMUSG00000073002	53620	Vamp5
ENSMUSG00000085604	59.6072	1.88343	0.497925	3.78256	0.000155225	0.00244991	ENSMUSG00000085604	NA	Dhx58os
ENSMUSG00000105983	22.3197	5.42843	1.43631	3.77944	0.000157182	0.00247222	ENSMUSG00000105983	NA	Gm42770
ENSMUSG00000075289	1046.71	0.710768	0.188146	3.77776	0.000158248	0.00248671	ENSMUSG00000075289	107239	Carns1
ENSMUSG00000025038	13.9127	5.88494	1.55853	3.77595	0.000159399	0.00250252	ENSMUSG00000025038	74405	Efhc2
ENSMUSG00000034936	27.6082	3.15879	0.837362	3.7723	0.000161747	0.00253476	ENSMUSG00000034936	80981	Arl4d
ENSMUSG00000032394	50.9661	2.36361	0.626912	3.77023	0.000163095	0.00255127	ENSMUSG00000032394	19289	Igdcc3
ENSMUSG00000021087	82.1177	2.09847	0.556689	3.76956	0.000163536	0.00255412	ENSMUSG00000021087	104001	Rtn1
ENSMUSG00000002504	772.412	0.548727	0.145668	3.76697	0.000165239	0.00257779	ENSMUSG00000002504	65962	Slc9a3r2
ENSMUSG00000055301	166.464	1.08595	0.288701	3.76151	0.000168894	0.00262767	ENSMUSG00000055301	11529	Adh7
ENSMUSG00000027858	180.647	1.08517	0.288652	3.75943	0.000170304	0.00264246	ENSMUSG00000027858	70747	Tspan2
ENSMUSG00000030243	94.9835	1.41688	0.377033	3.75797	0.000171298	0.0026555	ENSMUSG00000030243	19691	Recql
ENSMUSG00000025656	334.789	1.14209	0.304204	3.75436	0.000173786	0.00268683	ENSMUSG00000025656	236915	Arhgef9
ENSMUSG00000040451	1411.37	0.575575	0.153296	3.75466	0.000173574	0.00268683	ENSMUSG00000040451	208449	Sgms1
ENSMUSG00000115422	24.1086	3.04466	0.811619	3.75134	0.000175894	0.00271456	ENSMUSG00000115422	73989	4930452G13Rik
ENSMUSG00000052581	29.2388	4.07265	1.08589	3.7505	0.000176479	0.00271936	ENSMUSG00000052581	243499	Lrrtm4
ENSMUSG00000035873	782.963	0.679248	0.181114	3.75038	0.000176566	0.00271936	ENSMUSG00000035873	114774	Pawr
ENSMUSG00000020723	19.3783	4.34922	1.15972	3.75022	0.000176678	0.00271936	ENSMUSG00000020723	54377	Cacng4
ENSMUSG00000087176	7.9321	6.33328	1.68981	3.74793	0.000178301	0.00273945	ENSMUSG00000087176	NA	D230022J07Rik
ENSMUSG00000033316	41.4089	2.59812	0.693199	3.74802	0.000178239	0.00273945	ENSMUSG00000033316	231605	Galnt9
ENSMUSG00000020027	2279.05	0.643602	0.171763	3.74704	0.000178931	0.00274669	ENSMUSG00000020027	216233	Socs2
ENSMUSG00000025246	3812.42	0.493737	0.131824	3.74542	0.000180095	0.00276209	ENSMUSG00000025246	21372	Tbl1x
ENSMUSG00000067199	105.172	1.63156	0.435798	3.74384	0.00018123	0.00277704	ENSMUSG00000067199	14296	Frat1
ENSMUSG00000037235	8953.48	0.491754	0.13137	3.74327	0.000181644	0.00277844	ENSMUSG00000037235	17122	Mxd4
ENSMUSG00000092402	11.6646	4.91018	1.3119	3.74281	0.000181977	0.00278107	ENSMUSG00000092402	NA	Gm20485
ENSMUSG00000062157	9.12055	5.63258	1.50615	3.73974	0.000184214	0.00281278	ENSMUSG00000062157	242700	Ifnlr1
ENSMUSG00000044042	1321.06	0.508722	0.136063	3.73889	0.000184837	0.00281978	ENSMUSG00000044042	14260	Fmn1
ENSMUSG00000018822	21.4837	5.08793	1.36227	3.73489	0.000187797	0.00285485	ENSMUSG00000018822	54612	Sfrp5
ENSMUSG00000038068	97.0189	1.60512	0.430327	3.72999	0.000191486	0.00290325	ENSMUSG00000038068	218215	Rnf144b
ENSMUSG00000018470	96.9307	1.45709	0.390897	3.72754	0.000193355	0.00292645	ENSMUSG00000018470	16499	Kcnab3
ENSMUSG00000021250	369.821	1.25338	0.33628	3.72718	0.00019363	0.00292804	ENSMUSG00000021250	14281	Fos
ENSMUSG00000044461	168.948	1.09995	0.295269	3.72526	0.000195111	0.00294013	ENSMUSG00000044461	219134	Shisa2
ENSMUSG00000095930	351.022	1.05754	0.284017	3.7235	0.000196482	0.00295563	ENSMUSG00000095930	245269	Nim1k
ENSMUSG00000038354	71.6766	1.62413	0.436263	3.72282	0.000197013	0.00296103	ENSMUSG00000038354	213121	Ankrd35
ENSMUSG00000027796	130.986	1.50853	0.405955	3.71599	0.000202407	0.00303417	ENSMUSG00000027796	55994	Smad9
ENSMUSG00000074682	1092.2	0.538155	0.14484	3.71553	0.000202782	0.00303451	ENSMUSG00000074682	67917	Zcchc3
ENSMUSG00000073295	114.146	1.60904	0.433281	3.71361	0.000204321	0.00305225	ENSMUSG00000073295	58242	Nudt11
ENSMUSG00000035133	3055.73	0.580928	0.156726	3.70664	0.000210025	0.00312664	ENSMUSG00000035133	11855	Arhgap5
ENSMUSG00000030621	231.414	0.945598	0.255425	3.70206	0.000213857	0.00317811	ENSMUSG00000030621	109264	Me3
ENSMUSG00000031099	1271.52	0.590074	0.15939	3.70208	0.00021384	0.00317811	ENSMUSG00000031099	93761	Smarca1
ENSMUSG00000054146	13.9187	4.8507	1.31094	3.70016	0.000215463	0.00319656	ENSMUSG00000054146	16665	Krt15
ENSMUSG00000044224	1702.05	0.578461	0.156369	3.69934	0.000216158	0.00320411	ENSMUSG00000044224	78244	Dnajc21
ENSMUSG00000070348	13341.4	0.811817	0.219735	3.69453	0.000220293	0.00325702	ENSMUSG00000070348	12443	Ccnd1
ENSMUSG00000039031	687.277	0.831463	0.225211	3.69193	0.000222561	0.00328492	ENSMUSG00000039031	73910	Arhgap18
ENSMUSG00000034110	251.001	0.833228	0.225776	3.6905	0.00022381	0.00330053	ENSMUSG00000034110	212919	Kctd7
ENSMUSG00000049404	499.587	1.00879	0.273388	3.68994	0.000224311	0.00330227	ENSMUSG00000049404	109222	Rarres1
ENSMUSG00000033491	330.469	0.93235	0.252801	3.68807	0.000225958	0.00332369	ENSMUSG00000033491	244954	Prss35
ENSMUSG00000036617	434.064	0.849635	0.230401	3.68763	0.000226349	0.0033266	ENSMUSG00000036617	208618	Etl4
ENSMUSG00000028407	548.792	0.831555	0.225541	3.68694	0.000226966	0.00333283	ENSMUSG00000028407	100504309	Smim27
ENSMUSG00000009876	176.548	1.93926	0.526642	3.68231	0.00023113	0.00338821	ENSMUSG00000009876	84682	Cox4i2
ENSMUSG00000048240	201.958	0.998391	0.271413	3.67849	0.000234615	0.00343638	ENSMUSG00000048240	14708	Gng7
ENSMUSG00000024921	9666.27	0.506527	0.137749	3.67718	0.000235828	0.00344829	ENSMUSG00000024921	67155	Smarca2
ENSMUSG00000032220	1407.73	0.539003	0.146664	3.67509	0.000237762	0.00346775	ENSMUSG00000032220	71602	Myo1e
ENSMUSG00000040152	24833.5	0.886714	0.24146	3.6723	0.000240379	0.00349999	ENSMUSG00000040152	21825	Thbs1
ENSMUSG00000024292	21.9908	3.51738	0.958736	3.66877	0.000243719	0.00354266	ENSMUSG00000024292	64385	Cyp4f14
ENSMUSG00000021886	72.2834	2.87419	0.783593	3.66796	0.000244496	0.00355096	ENSMUSG00000021886	14744	Gpr65
ENSMUSG00000016494	570.052	0.972435	0.265246	3.66616	0.000246222	0.00357001	ENSMUSG00000016494	12490	Cd34
ENSMUSG00000029247	6150.62	0.618119	0.168644	3.66522	0.000247122	0.00357705	ENSMUSG00000029247	67054	Paics
ENSMUSG00000029919	527.101	1.24169	0.33898	3.66304	0.000249242	0.00359897	ENSMUSG00000029919	54486	Hpgds
ENSMUSG00000026712	1830.77	2.48374	0.678099	3.6628	0.00024947	0.00359897	ENSMUSG00000026712	17533	Mrc1
ENSMUSG00000025037	1607.46	0.508072	0.138808	3.66025	0.000251969	0.00361988	ENSMUSG00000025037	17161	Maoa
ENSMUSG00000000673	45.5391	2.30486	0.630252	3.65704	0.000255141	0.0036624	ENSMUSG00000000673	107766	Haao
ENSMUSG00000086108	13.1892	4.31081	1.17888	3.65671	0.000255476	0.00366415	ENSMUSG00000086108	NA	Gm5602
ENSMUSG00000025504	219.63	1.24096	0.33946	3.65569	0.000256494	0.00367571	ENSMUSG00000025504	98845	Eps8l2
ENSMUSG00000091337	8739.59	0.483521	0.132304	3.65462	0.000257563	0.00368796	ENSMUSG00000091337	58521	Eid1
ENSMUSG00000040569	176.528	1.08911	0.298191	3.65239	0.000259806	0.00371699	ENSMUSG00000040569	208890	Slc26a7
ENSMUSG00000039883	7697.66	0.735205	0.201343	3.65151	0.000260701	0.0037267	ENSMUSG00000039883	74511	Lrrc17
ENSMUSG00000048442	68.8426	2.91781	0.799343	3.65026	0.000261975	0.00373872	ENSMUSG00000048442	66528	Smim5
ENSMUSG00000031431	1042.39	0.528543	0.145246	3.63896	0.000273738	0.00388978	ENSMUSG00000031431	14605	Tsc22d3
ENSMUSG00000055421	1055.54	0.614428	0.168847	3.63897	0.000273733	0.00388978	ENSMUSG00000055421	211712	Pcdh9
ENSMUSG00000063382	9097.38	0.440287	0.121031	3.6378	0.000274976	0.00390167	ENSMUSG00000063382	80288	Bcl9l
ENSMUSG00000042195	14.5419	5.37642	1.47852	3.63636	0.000276515	0.00391707	ENSMUSG00000042195	72022	Slc35f2
ENSMUSG00000116930	7.79673	6.23976	1.71618	3.63585	0.000277068	0.00391846	ENSMUSG00000116930	NA	Gm49711
ENSMUSG00000028883	2682.62	0.803496	0.221164	3.63303	0.000280116	0.00395186	ENSMUSG00000028883	20346	Sema3a
ENSMUSG00000024076	424.915	0.73695	0.203049	3.62941	0.000284064	0.00400428	ENSMUSG00000024076	74199	Vit
ENSMUSG00000016179	18.9994	3.42477	0.944029	3.62782	0.000285826	0.00402583	ENSMUSG00000016179	215303	Camk1g
ENSMUSG00000030223	57.4673	3.44979	0.951457	3.6258	0.000288069	0.0040508	ENSMUSG00000030223	19277	Ptpro
ENSMUSG00000037813	166.255	1.21581	0.335378	3.6252	0.000288743	0.00405698	ENSMUSG00000037813	228846	D630003M21Rik
ENSMUSG00000042190	285.408	1.23199	0.339869	3.62489	0.000289087	0.0040585	ENSMUSG00000042190	14747	Cmklr1
ENSMUSG00000030276	71.5639	1.65214	0.456111	3.62224	0.000292065	0.00409033	ENSMUSG00000030276	101100	Ttll3
ENSMUSG00000048782	169.751	1.52018	0.420535	3.61488	0.000300487	0.00420146	ENSMUSG00000048782	233752	Insc
ENSMUSG00000070564	49.7479	2.27647	0.631751	3.60343	0.000314046	0.00438039	ENSMUSG00000070564	243967	Ntn5
ENSMUSG00000027985	31.1406	3.0995	0.861667	3.59709	0.000321793	0.00447399	ENSMUSG00000027985	16842	Lef1
ENSMUSG00000044317	46.4871	1.84847	0.515981	3.58244	0.000340406	0.00470245	ENSMUSG00000044317	319197	Gpr4
ENSMUSG00000015850	2281.96	0.577786	0.161279	3.58252	0.000340296	0.00470245	ENSMUSG00000015850	229595	Adamtsl4
ENSMUSG00000068015	350.744	0.770891	0.215221	3.58185	0.000341169	0.00470922	ENSMUSG00000068015	380916	Lrch1
ENSMUSG00000084843	55.3573	1.8234	0.50941	3.57943	0.00034435	0.00474553	ENSMUSG00000084843	NA	B230312C02Rik
ENSMUSG00000073700	696.185	0.640808	0.179404	3.57187	0.000354445	0.00486523	ENSMUSG00000073700	242785	Klhl21
ENSMUSG00000041308	3650.9	0.629684	0.176746	3.56266	0.00036712	0.00500733	ENSMUSG00000041308	20650	Sntb2
ENSMUSG00000030047	53.7129	2.66694	0.749078	3.56029	0.000370441	0.00504466	ENSMUSG00000030047	232201	Arhgap25
ENSMUSG00000053702	80.5415	1.40857	0.395868	3.55818	0.000373439	0.00508148	ENSMUSG00000053702	74103	Nebl
ENSMUSG00000028399	3376.67	0.719929	0.202462	3.55586	0.000376737	0.00511425	ENSMUSG00000028399	19266	Ptprd
ENSMUSG00000022439	48.779	3.14773	0.885318	3.55548	0.000377291	0.00511775	ENSMUSG00000022439	64099	Parvg
ENSMUSG00000020810	287.771	0.916731	0.257879	3.55488	0.000378145	0.00512531	ENSMUSG00000020810	114886	Cygb
ENSMUSG00000033059	3232.85	0.650013	0.183369	3.54484	0.000392845	0.00531203	ENSMUSG00000033059	110078	Pygb
ENSMUSG00000051285	2177.33	0.749347	0.211412	3.54448	0.000393385	0.00531517	ENSMUSG00000051285	319263	Pcmtd1
ENSMUSG00000032698	210.739	1.81897	0.51333	3.54347	0.000394905	0.00533152	ENSMUSG00000032698	16909	Lmo2
ENSMUSG00000083332	7.67954	5.17143	1.45969	3.54282	0.000395874	0.00534043	ENSMUSG00000083332	NA	Gm7599
ENSMUSG00000118669	254.929	0.78447	0.221449	3.54244	0.000396439	0.00534388	ENSMUSG00000118669	11877
ENSMUSG00000042524	2443.16	0.531936	0.150284	3.53953	0.000400839	0.00539475	ENSMUSG00000042524	223697	Sun2
ENSMUSG00000032186	698.003	0.757502	0.214094	3.53818	0.000402901	0.00541829	ENSMUSG00000032186	50876	Tmod2
ENSMUSG00000110084	81.1504	2.12993	0.60222	3.53679	0.000405017	0.0054387	ENSMUSG00000110084	NA	Gm45257
ENSMUSG00000035270	77.467	1.56644	0.443062	3.53549	0.000407018	0.00545663	ENSMUSG00000035270	224224	Impg2
ENSMUSG00000014704	480.887	0.976773	0.276413	3.53374	0.000409728	0.00548871	ENSMUSG00000014704	15399	Hoxa2
ENSMUSG00000109130	17.8554	3.11504	0.882142	3.53122	0.000413647	0.0055369	ENSMUSG00000109130	NA	Gm45187
ENSMUSG00000105514	12.1378	4.20266	1.19022	3.531	0.000413989	0.00553719	ENSMUSG00000105514	NA	Gm42913
ENSMUSG00000025422	17.5016	4.40107	1.24683	3.52982	0.000415838	0.00555761	ENSMUSG00000025422	216439	Agap2
ENSMUSG00000050212	5342.3	0.466419	0.132158	3.52924	0.000416748	0.00556545	ENSMUSG00000050212	230752	Eva1b
ENSMUSG00000032527	1630.3	0.544605	0.154327	3.5289	0.000417293	0.00556843	ENSMUSG00000032527	66904	Pccb
ENSMUSG00000011114	1251.27	0.595085	0.169008	3.52105	0.000429837	0.00572254	ENSMUSG00000011114	21376	Tbrg1
ENSMUSG00000007989	275.24	0.855015	0.242992	3.5187	0.000433675	0.00576473	ENSMUSG00000007989	14365	Fzd3
ENSMUSG00000032911	919.109	0.715547	0.203509	3.51605	0.000438016	0.00581339	ENSMUSG00000032911	121021	Cspg4
ENSMUSG00000004044	30612.2	0.482043	0.137106	3.51585	0.000438346	0.00581339	ENSMUSG00000004044	19285	Cavin1
ENSMUSG00000086509	18.1808	3.69654	1.05242	3.51244	0.000444017	0.00587505	ENSMUSG00000086509	100313531	Nkx2-2os
ENSMUSG00000057766	200.506	0.962783	0.27413	3.51214	0.00044452	0.0058772	ENSMUSG00000057766	225187	Ankrd29
ENSMUSG00000038233	183.427	1.43409	0.408688	3.50901	0.000449782	0.00593767	ENSMUSG00000038233	245050	Gask1a
ENSMUSG00000063428	11.0712	4.82865	1.37648	3.50796	0.000451549	0.00594844	ENSMUSG00000063428	70503	Ddo
ENSMUSG00000032216	31278.5	0.417131	0.118911	3.50792	0.000451632	0.00594844	ENSMUSG00000032216	17999	Nedd4
ENSMUSG00000055435	26972.3	0.806178	0.23017	3.50253	0.000460859	0.00606535	ENSMUSG00000055435	17132	Maf
ENSMUSG00000048200	228.609	0.923255	0.263829	3.49945	0.000466216	0.00611718	ENSMUSG00000048200	213573	Cracr2b
ENSMUSG00000060572	5513.83	0.637732	0.182494	3.49453	0.000474895	0.00622159	ENSMUSG00000060572	17150	Mfap2
ENSMUSG00000057133	1616.57	0.590979	0.169342	3.48986	0.000483273	0.00631442	ENSMUSG00000057133	71389	Chd6
ENSMUSG00000014850	477.152	0.746957	0.214163	3.48779	0.000487034	0.00635649	ENSMUSG00000014850	17686	Msh3
ENSMUSG00000020070	1011.16	0.723794	0.207576	3.48689	0.000488667	0.00637299	ENSMUSG00000020070	70432	Rufy2
ENSMUSG00000015854	15.0761	4.82681	1.3852	3.48455	0.000492958	0.0064241	ENSMUSG00000015854	11801	Cd5l
ENSMUSG00000090386	1503.44	0.688048	0.197654	3.48107	0.000499411	0.00649837	ENSMUSG00000090386	77994	Mir99ahg
ENSMUSG00000050199	372.99	0.713649	0.205105	3.47942	0.000502493	0.00652428	ENSMUSG00000050199	107515	Lgr4
ENSMUSG00000029765	153.124	1.29777	0.373515	3.47449	0.000511835	0.00662506	ENSMUSG00000029765	243743	Plxna4
ENSMUSG00000062563	376.834	0.669499	0.192741	3.47357	0.000513585	0.00663775	ENSMUSG00000062563	12879	Cys1
ENSMUSG00000022201	7184.78	0.407499	0.11745	3.46956	0.000521309	0.00672923	ENSMUSG00000022201	22763	Zfr
ENSMUSG00000059921	1704.81	0.726282	0.209334	3.46949	0.000521443	0.00672923	ENSMUSG00000059921	22253	Unc5c
ENSMUSG00000003949	30.5695	2.62725	0.758448	3.46398	0.000532248	0.00685329	ENSMUSG00000003949	217082	Hlf
ENSMUSG00000055254	76.5146	1.67088	0.482854	3.46044	0.000539297	0.00693888	ENSMUSG00000055254	18212	Ntrk2
ENSMUSG00000074622	1604.03	0.44617	0.128977	3.45929	0.000541601	0.00695814	ENSMUSG00000074622	16658	Mafb
ENSMUSG00000067878	101.923	1.36683	0.395393	3.4569	0.000546419	0.00700961	ENSMUSG00000067878	320923	Map7d3
ENSMUSG00000032340	2747.8	0.554752	0.160534	3.45566	0.000548953	0.00703688	ENSMUSG00000032340	18007	Neo1
ENSMUSG00000067873	1997.45	0.546786	0.158301	3.45408	0.000552177	0.00707295	ENSMUSG00000067873	72459	Htatsf1
ENSMUSG00000020644	5490.25	0.715443	0.207339	3.45059	0.000559362	0.00715435	ENSMUSG00000020644	15902	Id2
ENSMUSG00000097589	384.24	0.679782	0.197225	3.44673	0.00056742	0.00723257	ENSMUSG00000097589	NA	Dleu2
ENSMUSG00000024431	3010.88	0.427057	0.12401	3.44373	0.000573747	0.00730586	ENSMUSG00000024431	14815	Nr3c1
ENSMUSG00000028906	1185.62	0.531716	0.154478	3.44201	0.000577403	0.00734699	ENSMUSG00000028906	269587	Epb41
ENSMUSG00000060510	1385.96	0.561032	0.163137	3.43902	0.00058382	0.00742316	ENSMUSG00000060510	77519	Zfp266
ENSMUSG00000108391	9.36623	5.06824	1.47453	3.4372	0.000587771	0.00746789	ENSMUSG00000108391	NA	Gm9768
ENSMUSG00000022537	474.464	0.657231	0.191277	3.43602	0.000590327	0.00749484	ENSMUSG00000022537	224090	Tmem44
ENSMUSG00000040229	16.6756	5.10979	1.48794	3.43413	0.000594454	0.00753615	ENSMUSG00000040229	23890	Gpr34
ENSMUSG00000020817	2663.27	0.422945	0.123384	3.42787	0.000608336	0.00770083	ENSMUSG00000020817	54189	Rabep1
ENSMUSG00000092260	170.844	1.35407	0.395088	3.42725	0.000609729	0.00771281	ENSMUSG00000092260	620419	Zfp963
ENSMUSG00000058013	12667.6	0.461462	0.134718	3.42539	0.000613907	0.00775021	ENSMUSG00000058013	52398	Septin11
ENSMUSG00000003849	747.312	0.571549	0.166902	3.42446	0.000616021	0.00776393	ENSMUSG00000003849	18104	Nqo1
ENSMUSG00000027332	892.934	0.544394	0.158964	3.42464	0.000615612	0.00776393	ENSMUSG00000027332	56357	Ivd
ENSMUSG00000058099	262.496	1.58453	0.463083	3.4217	0.000622312	0.00783749	ENSMUSG00000058099	74039	Nfam1
ENSMUSG00000035064	841.773	0.654844	0.191414	3.42109	0.000623706	0.00784933	ENSMUSG00000035064	13631	Eef2k
ENSMUSG00000056854	24739.3	0.631741	0.184745	3.41953	0.000627296	0.00787154	ENSMUSG00000056854	18994	Pou3f4
ENSMUSG00000062470	64.2126	1.33334	0.390495	3.41448	0.000639037	0.00800141	ENSMUSG00000062470	66662	Fbxl12os
ENSMUSG00000074212	2183.04	0.494985	0.145366	3.4051	0.000661401	0.00825149	ENSMUSG00000074212	70604	Dnajb14
ENSMUSG00000031133	568.737	0.863451	0.253898	3.40077	0.000671952	0.00835968	ENSMUSG00000031133	73341	Arhgef6
ENSMUSG00000036580	2293.02	0.523098	0.154213	3.39204	0.000693733	0.00862368	ENSMUSG00000036580	229285	Spg20
ENSMUSG00000058145	36.8083	2.69005	0.79481	3.38452	0.000713023	0.00883801	ENSMUSG00000058145	233332	Adamts17
ENSMUSG00000046750	15.3142	3.22263	0.952835	3.38215	0.000719216	0.00890197	ENSMUSG00000046750	280621	Selenov
ENSMUSG00000043644	124.247	1.15902	0.342727	3.38177	0.000720204	0.00890734	ENSMUSG00000043644	66838	0610009L18Rik
ENSMUSG00000024074	2958.88	0.463426	0.137044	3.38159	0.000720682	0.00890734	ENSMUSG00000024074	50766	Crim1
ENSMUSG00000035828	1419.37	0.824804	0.244074	3.37932	0.000726645	0.00897461	ENSMUSG00000035828	223775	Pim3
ENSMUSG00000044770	151.415	1.17033	0.346356	3.37897	0.000727576	0.00897968	ENSMUSG00000044770	268297	Scml4
ENSMUSG00000032174	170.572	1.01354	0.300176	3.37649	0.00073417	0.00902877	ENSMUSG00000032174	15898	Icam5
ENSMUSG00000009073	2212.43	0.492595	0.145882	3.37667	0.000733685	0.00902877	ENSMUSG00000009073	18016	Nf2
ENSMUSG00000046598	202.849	0.839868	0.248763	3.37617	0.000735015	0.00903273	ENSMUSG00000046598	71911	Bdh1
ENSMUSG00000025666	1252.84	0.505889	0.149851	3.37595	0.000735611	0.00903361	ENSMUSG00000025666	192216	Tmem47
ENSMUSG00000024048	29174.1	0.563827	0.167028	3.37565	0.000736426	0.00903719	ENSMUSG00000024048	67268	Myl12a
ENSMUSG00000054162	105.697	1.57711	0.467921	3.37046	0.00075043	0.00918944	ENSMUSG00000054162	72902	Spock3
ENSMUSG00000034252	2878.16	0.402655	0.119577	3.36732	0.00075902	0.00928145	ENSMUSG00000034252	215351	Senp6
ENSMUSG00000031328	13392.1	0.534487	0.158754	3.36677	0.000760554	0.00929362	ENSMUSG00000031328	192176	Flna
ENSMUSG00000000416	289.826	0.841959	0.250277	3.36411	0.0007679	0.00937012	ENSMUSG00000000416	30785	Cttnbp2
ENSMUSG00000023092	1244.73	0.746584	0.221977	3.36334	0.000770044	0.00938964	ENSMUSG00000023092	14199	Fhl1
ENSMUSG00000113165	290.421	0.802579	0.239012	3.35791	0.000785351	0.00955602	ENSMUSG00000113165	NA	Gm47863
ENSMUSG00000039197	1906.31	0.397506	0.118442	3.35611	0.000790473	0.00959804	ENSMUSG00000039197	11534	Adk
ENSMUSG00000116908	195.947	1.2302	0.36654	3.35626	0.000790046	0.00959804	ENSMUSG00000116908	NA	Gm49599
ENSMUSG00000036501	541.08	0.94592	0.281998	3.35435	0.000795506	0.00964254	ENSMUSG00000036501	225358	Fam13b
ENSMUSG00000032554	823.149	0.632451	0.188665	3.35225	0.000801576	0.00970554	ENSMUSG00000032554	22041	Trf
ENSMUSG00000004633	78.9066	1.76169	0.525694	3.35117	0.000804696	0.00972686	ENSMUSG00000004633	69993	Chn2
ENSMUSG00000033278	913.669	0.735896	0.219601	3.35106	0.000805028	0.00972686	ENSMUSG00000033278	19274	Ptprm
ENSMUSG00000019906	247.361	1.08931	0.325218	3.34948	0.000809625	0.00977555	ENSMUSG00000019906	108030	Lin7a
ENSMUSG00000079293	65.3495	2.51408	0.751801	3.34407	0.000825586	0.00993351	ENSMUSG00000079293	56644	Clec7a
ENSMUSG00000102752	25.7397	2.55836	0.765782	3.34085	0.000835231	0.0100238	ENSMUSG00000102752	665574	Gm7694
ENSMUSG00000027111	1389.11	0.771211	0.230847	3.34079	0.000835416	0.0100238	ENSMUSG00000027111	16403	Itga6
ENSMUSG00000101599	90.2705	1.50284	0.449892	3.34046	0.000836412	0.0100288	ENSMUSG00000101599	NA	Gm20342
ENSMUSG00000001508	9.05249	6.05162	1.81184	3.34005	0.000837639	0.0100365	ENSMUSG00000001508	20391	Sgca
ENSMUSG00000031561	1439.74	0.986507	0.295507	3.33835	0.000842765	0.010091	ENSMUSG00000031561	23965	Tenm3
ENSMUSG00000001288	4553.34	0.44196	0.132492	3.33575	0.000850682	0.0101716	ENSMUSG00000001288	19411	Rarg
ENSMUSG00000025784	39.6292	1.77642	0.532795	3.33415	0.000855591	0.0102162	ENSMUSG00000025784	21922	Clec3b
ENSMUSG00000090223	199.537	4.59561	1.37927	3.33191	0.00086251	0.0102846	ENSMUSG00000090223	18546	Pcp4
ENSMUSG00000018209	1782.37	0.48053	0.144258	3.33104	0.00086522	0.0103026	ENSMUSG00000018209	58231	Stk4
ENSMUSG00000041837	402.212	0.709495	0.213458	3.32382	0.000887929	0.0105512	ENSMUSG00000041837	50996	Pdcd7
ENSMUSG00000033577	2856.77	0.608811	0.183218	3.32288	0.000890933	0.0105796	ENSMUSG00000033577	17920	Myo6
ENSMUSG00000039611	630.468	0.670137	0.202086	3.31609	0.000912849	0.0108175	ENSMUSG00000039611	67063	Pgap4
ENSMUSG00000040268	647.677	0.535247	0.161419	3.31589	0.000913508	0.0108179	ENSMUSG00000040268	101476	Plekha1
ENSMUSG00000103038	58.2941	1.40137	0.423526	3.30881	0.000936923	0.0110648	ENSMUSG00000103038	NA	Gm37124
ENSMUSG00000044447	579.696	0.71851	0.217188	3.30824	0.000938825	0.0110797	ENSMUSG00000044447	68813	Dock5
ENSMUSG00000027765	63.1888	1.65765	0.501162	3.30761	0.000940951	0.0110972	ENSMUSG00000027765	18441	P2ry1
ENSMUSG00000060206	560.514	0.68385	0.206762	3.30742	0.0009416	0.0110972	ENSMUSG00000060206	242466	Zfp462
ENSMUSG00000042035	4050.27	0.505948	0.153065	3.30544	0.000948275	0.0111607	ENSMUSG00000042035	78908	Igsf3
ENSMUSG00000104970	13.564	3.66907	1.11025	3.30473	0.000950678	0.0111813	ENSMUSG00000104970	NA	Gm43137
ENSMUSG00000042292	810.563	0.586851	0.177769	3.3012	0.000962711	0.0113074	ENSMUSG00000042292	223701	Mrtfa
ENSMUSG00000038738	247.074	1.11835	0.339187	3.29715	0.000976722	0.0114564	ENSMUSG00000038738	243961	Shank1
ENSMUSG00000087403	330.334	0.911828	0.276732	3.29499	0.000984265	0.0115214	ENSMUSG00000087403	NA	Kantr
ENSMUSG00000037552	1047.15	0.46493	0.141215	3.29234	0.000993568	0.0116066	ENSMUSG00000037552	101497	Plekhg2
ENSMUSG00000028464	11915.1	0.538983	0.16376	3.29129	0.000997282	0.0116422	ENSMUSG00000028464	22004	Tpm2
ENSMUSG00000031075	200.332	1.06742	0.324606	3.28834	0.00100779	0.0117489	ENSMUSG00000031075	101772	Ano1
ENSMUSG00000025931	192.103	0.851354	0.25898	3.28734	0.0010114	0.0117776	ENSMUSG00000025931	74229	Paqr8
ENSMUSG00000028518	111.398	1.2483	0.379737	3.28728	0.00101161	0.0117776	ENSMUSG00000028518	108079	Prkaa2
ENSMUSG00000112280	44.4065	1.57798	0.480729	3.28248	0.00102897	0.0119457	ENSMUSG00000112280	414093	A830082N09Rik
ENSMUSG00000025959	2854.05	0.395834	0.120706	3.27934	0.00104051	0.0120652	ENSMUSG00000025959	93691	Klf7
ENSMUSG00000053647	435.644	0.882172	0.269073	3.27856	0.00104338	0.0120903	ENSMUSG00000053647	76854	Gper1
ENSMUSG00000106772	72.5181	1.75924	0.537126	3.27529	0.00105555	0.0122114	ENSMUSG00000106772	NA	Gm43794
ENSMUSG00000027602	4597.04	0.393735	0.120218	3.27518	0.00105596	0.0122114	ENSMUSG00000027602	66734	Map1lc3a
ENSMUSG00000001270	2318.12	0.652165	0.199543	3.26829	0.00108198	0.0124706	ENSMUSG00000001270	12709	Ckb
ENSMUSG00000025867	635.917	0.543192	0.166357	3.26521	0.00109383	0.0125903	ENSMUSG00000025867	12890	Cplx2
ENSMUSG00000048126	5129.51	0.687668	0.210628	3.26485	0.00109522	0.012598	ENSMUSG00000048126	12835	Col6a3
ENSMUSG00000045098	937.734	0.537891	0.164918	3.26156	0.00110802	0.0127282	ENSMUSG00000045098	225888	Kmt5b
ENSMUSG00000034171	65.3988	1.92167	0.590252	3.25568	0.00113122	0.0129774	ENSMUSG00000034171	14073	Faah
ENSMUSG00000032601	3066.18	0.467585	0.143677	3.25443	0.0011362	0.0130259	ENSMUSG00000032601	19087	Prkar2a
ENSMUSG00000021972	314.524	0.825817	0.253769	3.25422	0.00113706	0.0130271	ENSMUSG00000021972	219150	Hmbox1
ENSMUSG00000058690	3659.35	0.415857	0.127823	3.25338	0.00114039	0.0130566	ENSMUSG00000058690	72972	Ccser2
ENSMUSG00000015289	1966.36	0.498137	0.153173	3.25213	0.00114545	0.0130972	ENSMUSG00000015289	66192	Lage3
ENSMUSG00000034158	2607.49	0.527718	0.162485	3.2478	0.00116301	0.0132628	ENSMUSG00000034158	320184	Lrrc58
ENSMUSG00000078670	135.802	1.47993	0.455968	3.24569	0.00117165	0.0133437	ENSMUSG00000078670	100038347	Fam174b
ENSMUSG00000025488	8.13323	6.16343	1.9001	3.24373	0.00117974	0.0134093	ENSMUSG00000025488	12869	Cox8b
ENSMUSG00000027784	323.901	0.714783	0.220358	3.24373	0.00117974	0.0134093	ENSMUSG00000027784	242083	Ppm1l
ENSMUSG00000034652	69.8338	2.0222	0.623547	3.24307	0.0011825	0.0134318	ENSMUSG00000034652	217303	Cd300a
ENSMUSG00000042286	250.638	1.49711	0.463473	3.2302	0.00123705	0.0139595	ENSMUSG00000042286	192187	Stab1
ENSMUSG00000062694	179.188	1.03599	0.321003	3.22735	0.00124941	0.0140806	ENSMUSG00000062694	12391	Cav3
ENSMUSG00000103285	46.0241	1.77497	0.550346	3.22519	0.00125891	0.0141598	ENSMUSG00000103285	NA	Gm37274
ENSMUSG00000025262	205.143	0.972262	0.301802	3.22152	0.00127512	0.014277	ENSMUSG00000025262	207375	Fam120c
ENSMUSG00000024538	16166.9	0.322824	0.100259	3.21991	0.00128232	0.0143483	ENSMUSG00000024538	19038	Ppic
ENSMUSG00000000392	413.815	0.980936	0.305051	3.21565	0.00130151	0.0145442	ENSMUSG00000000392	14089	Fap
ENSMUSG00000071722	216.15	0.818454	0.254538	3.21545	0.0013024	0.0145447	ENSMUSG00000071722	270624	Spin4
ENSMUSG00000030172	4231.5	0.51691	0.160841	3.21379	0.00130997	0.0146088	ENSMUSG00000030172	111173	Erc1
ENSMUSG00000029767	23486.8	0.507821	0.158086	3.21231	0.00131673	0.0146668	ENSMUSG00000029767	12321	Calu
ENSMUSG00000021866	763.153	0.538969	0.167858	3.21086	0.00132336	0.0147312	ENSMUSG00000021866	11744	Anxa11
ENSMUSG00000031972	187.752	1.53787	0.479126	3.20975	0.00132851	0.0147694	ENSMUSG00000031972	11459	Acta1
ENSMUSG00000087231	23.9162	2.24275	0.698846	3.20923	0.00133093	0.0147867	ENSMUSG00000087231	320172	E230016M11Rik
ENSMUSG00000041482	345.937	1.00842	0.314441	3.20702	0.00134117	0.014891	ENSMUSG00000041482	667742	Piezo2
ENSMUSG00000102158	53.6156	1.44079	0.449563	3.20487	0.00135125	0.014974	ENSMUSG00000102158	NA	Gm34342
ENSMUSG00000025854	779.379	0.579684	0.180961	3.20336	0.00135833	0.0150428	ENSMUSG00000025854	80752	Fam20c
ENSMUSG00000031673	17516.1	0.610033	0.190476	3.20267	0.00136161	0.0150694	ENSMUSG00000031673	12552	Cdh11
ENSMUSG00000031644	915.709	0.520167	0.162454	3.20193	0.0013651	0.0150984	ENSMUSG00000031644	18004	Nek1
ENSMUSG00000103620	29.0758	2.70145	0.843805	3.20151	0.0013671	0.0151011	ENSMUSG00000103620	NA	Gm37359
ENSMUSG00000072966	311.117	0.699292	0.218442	3.20127	0.00136821	0.0151038	ENSMUSG00000072966	245607	Gprasp2
ENSMUSG00000085667	35.7433	1.83606	0.574018	3.19861	0.00138094	0.0152248	ENSMUSG00000085667	545681	Gm12992
ENSMUSG00000031229	8300.27	0.501098	0.156797	3.19584	0.00139422	0.0153614	ENSMUSG00000031229	22589	Atrx
ENSMUSG00000032727	1411.17	0.569077	0.178093	3.19539	0.00139643	0.0153759	ENSMUSG00000032727	218613	Mier3
ENSMUSG00000047216	12.7951	4.2331	1.3253	3.19406	0.00140286	0.0154269	ENSMUSG00000047216	227485	Cdh19
ENSMUSG00000110187	9.99586	4.94367	1.54855	3.19246	0.00141067	0.0154931	ENSMUSG00000110187	NA	Gm45496
ENSMUSG00000046186	944.539	0.797301	0.249925	3.19016	0.00142194	0.0155872	ENSMUSG00000046186	235505	Cd109
ENSMUSG00000063455	265.332	0.856439	0.268698	3.18737	0.00143574	0.0157184	ENSMUSG00000063455	330286	D630045J12Rik
ENSMUSG00000022602	93.4452	1.30729	0.410215	3.18684	0.00143838	0.0157374	ENSMUSG00000022602	11838	Arc
ENSMUSG00000041540	1057.81	0.612095	0.192308	3.18289	0.00145812	0.015923	ENSMUSG00000041540	20678	Sox5
ENSMUSG00000058756	7365.89	0.36076	0.113393	3.1815	0.00146513	0.0159793	ENSMUSG00000058756	21833	Thra
ENSMUSG00000022836	6647.38	0.495628	0.155883	3.17949	0.00147532	0.0160804	ENSMUSG00000022836	107589	Mylk
ENSMUSG00000015568	1713.62	0.756151	0.237985	3.1773	0.00148654	0.0161822	ENSMUSG00000015568	16956	Lpl
ENSMUSG00000038623	36.685	3.12927	0.985197	3.17628	0.00149175	0.0162244	ENSMUSG00000038623	107769	Tm6sf1
ENSMUSG00000003070	633.614	0.892888	0.28112	3.17618	0.0014923	0.0162244	ENSMUSG00000003070	13637	Efna2
ENSMUSG00000024105	30.6831	2.28955	0.721878	3.17166	0.00151572	0.0164377	ENSMUSG00000024105	74556	Themis3
ENSMUSG00000022708	15839.5	0.791991	0.249802	3.17047	0.00152192	0.0164836	ENSMUSG00000022708	56490	Zbtb20
ENSMUSG00000043681	10.3892	4.54915	1.43541	3.16924	0.00152839	0.0165334	ENSMUSG00000043681	69134	Fam25c
ENSMUSG00000000253	444.451	0.561987	0.177381	3.16824	0.00153366	0.0165696	ENSMUSG00000000253	66355	Gmpr
ENSMUSG00000087177	124.355	0.928446	0.293076	3.16794	0.00153525	0.0165765	ENSMUSG00000087177	327744	E130307A14Rik
ENSMUSG00000034832	500.524	0.910136	0.287356	3.16728	0.00153871	0.0166035	ENSMUSG00000034832	194388	Tet3
ENSMUSG00000022372	60.4394	2.6054	0.82277	3.16662	0.00154219	0.0166306	ENSMUSG00000022372	20491	Sla
ENSMUSG00000033763	1764.44	0.495129	0.15648	3.16418	0.00155523	0.0167503	ENSMUSG00000033763	244654	Mtss2
ENSMUSG00000048478	258.519	0.874143	0.276353	3.16314	0.00156076	0.0167888	ENSMUSG00000048478	320869	Spata33
ENSMUSG00000032289	207.671	0.971996	0.307361	3.1624	0.00156477	0.0168215	ENSMUSG00000032289	207596	Thsd4
ENSMUSG00000042302	1216.28	0.534951	0.169387	3.15816	0.00158769	0.017015	ENSMUSG00000042302	216565	Ehbp1
ENSMUSG00000000420	2586.3	0.439229	0.139202	3.15535	0.00160307	0.0171478	ENSMUSG00000000420	14423	Galnt1
ENSMUSG00000064339	301647	0.585843	0.185659	3.15547	0.00160237	0.0171478	ENSMUSG00000064339	NA	mt-Rnr2
ENSMUSG00000019820	2453.85	0.510043	0.161663	3.15498	0.00160506	0.0171478	ENSMUSG00000019820	22288	Utrn
ENSMUSG00000033083	539.853	0.728629	0.230944	3.155	0.00160496	0.0171478	ENSMUSG00000033083	210789	Tbc1d4
ENSMUSG00000000594	2181.79	0.488484	0.15485	3.15457	0.00160737	0.0171619	ENSMUSG00000000594	14667	Gm2a
ENSMUSG00000031286	214.345	1.06762	0.338796	3.15123	0.00162586	0.0173164	ENSMUSG00000031286	320302	Glt28d2
ENSMUSG00000070691	727.377	0.535887	0.170121	3.15003	0.00163252	0.0173659	ENSMUSG00000070691	12399	Runx3
ENSMUSG00000020175	194.109	0.910629	0.289314	3.14754	0.00164649	0.0174691	ENSMUSG00000020175	76877	Rab36
ENSMUSG00000097305	6.91386	5.32136	1.69057	3.14766	0.00164582	0.0174691	ENSMUSG00000097305	NA	Gm17276
ENSMUSG00000048355	290.879	0.746468	0.237374	3.1447	0.00166259	0.017599	ENSMUSG00000048355	76219	Arxes1
ENSMUSG00000023039	45.2571	2.02459	0.64418	3.14289	0.00167289	0.0176972	ENSMUSG00000023039	110310	Krt7
ENSMUSG00000089929	27.2157	4.26511	1.35767	3.14148	0.00168097	0.0177608	ENSMUSG00000089929	12045	Bcl2a1b
ENSMUSG00000045657	7.01237	4.83943	1.54073	3.141	0.0016837	0.0177788	ENSMUSG00000045657	93881	Pcdhb10
ENSMUSG00000016933	1810.37	0.411074	0.130932	3.13961	0.00169173	0.0178417	ENSMUSG00000016933	18803	Plcg1
ENSMUSG00000035237	87.2779	1.25822	0.400993	3.13776	0.00170246	0.017933	ENSMUSG00000035237	16816	Lcat
ENSMUSG00000062421	2701.91	0.467852	0.149145	3.13691	0.0017074	0.0179741	ENSMUSG00000062421	11841	Arf2
ENSMUSG00000022747	123.388	1.1107	0.354124	3.13647	0.00170993	0.0179898	ENSMUSG00000022747	54613	St3gal6
ENSMUSG00000042155	356.77	0.729619	0.232685	3.13565	0.00171471	0.018029	ENSMUSG00000042155	277396	Klhl23
ENSMUSG00000031283	658.567	0.828194	0.264363	3.13279	0.00173154	0.0181838	ENSMUSG00000031283	83453	Chrdl1
ENSMUSG00000021010	224.864	0.7864	0.251116	3.13162	0.00173843	0.018245	ENSMUSG00000021010	27386	Npas3
ENSMUSG00000029675	3590.03	2.07925	0.664237	3.13029	0.00174637	0.0183061	ENSMUSG00000029675	13717	Eln
ENSMUSG00000107653	52.2145	1.42827	0.456338	3.12985	0.00174894	0.018322	ENSMUSG00000107653	102633773	Gm31520
ENSMUSG00000053477	14431.7	0.358043	0.114562	3.12533	0.00177606	0.0185385	ENSMUSG00000053477	21413	Tcf4
ENSMUSG00000097282	13.6266	4.21358	1.34868	3.12422	0.00178278	0.0185974	ENSMUSG00000097282	NA	5031415H12Rik
ENSMUSG00000031314	2111.75	0.480263	0.153905	3.12052	0.00180534	0.018791	ENSMUSG00000031314	270627	Taf1
ENSMUSG00000074001	7.6629	5.94202	1.90442	3.12012	0.00180775	0.0188011	ENSMUSG00000074001	72330	Klhl40
ENSMUSG00000030691	950.727	0.455178	0.146084	3.11587	0.001834	0.0190511	ENSMUSG00000030691	207278	Fchsd2
ENSMUSG00000013033	5251.52	0.495774	0.159136	3.1154	0.00183693	0.0190618	ENSMUSG00000013033	330814	Adgrl1
ENSMUSG00000052105	62.2705	1.52997	0.491472	3.11303	0.0018518	0.0191897	ENSMUSG00000052105	68617	Mtcl1
ENSMUSG00000032224	43.2323	2.21062	0.710855	3.1098	0.00187215	0.0193658	ENSMUSG00000032224	76886	Fam81a
ENSMUSG00000056222	12.311	4.96368	1.59705	3.10802	0.00188343	0.0194518	ENSMUSG00000056222	20745	Spock1
ENSMUSG00000058056	12592.5	0.433977	0.139775	3.10483	0.0019039	0.0195942	ENSMUSG00000058056	72333	Palld
ENSMUSG00000021624	259.192	1.80528	0.581429	3.1049	0.00190345	0.0195942	ENSMUSG00000021624	17079	Cd180
ENSMUSG00000023044	4388	0.40123	0.129306	3.10294	0.00191608	0.0196903	ENSMUSG00000023044	246277	Csad
ENSMUSG00000010461	3197.57	0.548758	0.176897	3.10213	0.00192133	0.0197243	ENSMUSG00000010461	14051	Eya4
ENSMUSG00000037003	794.396	0.557429	0.179695	3.10208	0.00192168	0.0197243	ENSMUSG00000037003	209039	Tns2
ENSMUSG00000034612	712.708	0.709167	0.228799	3.09951	0.00193838	0.019825	ENSMUSG00000034612	58250	Chst11
ENSMUSG00000117901	209.602	0.86973	0.280752	3.09786	0.00194921	0.0199239	ENSMUSG00000117901	NA
ENSMUSG00000009772	601.35	0.601329	0.194165	3.09701	0.00195486	0.0199699	ENSMUSG00000009772	74137	Nuak2
ENSMUSG00000038175	740.735	0.751039	0.242643	3.09524	0.0019665	0.020077	ENSMUSG00000038175	218203	Mylip
ENSMUSG00000040093	102.489	1.43876	0.465034	3.09389	0.00197553	0.0201453	ENSMUSG00000040093	171543	Bmf
ENSMUSG00000037034	412.946	1.05534	0.341287	3.09225	0.00198649	0.0202086	ENSMUSG00000037034	18503	Pax1
ENSMUSG00000031293	12.369	4.15572	1.34397	3.09211	0.00198737	0.0202086	ENSMUSG00000031293	20147	Rs1
ENSMUSG00000015755	5721.54	0.365093	0.11808	3.09191	0.00198876	0.0202086	ENSMUSG00000015755	68652	Tab2
ENSMUSG00000031523	4551.41	0.392345	0.126889	3.09205	0.00198782	0.0202086	ENSMUSG00000031523	50768	Dlc1
ENSMUSG00000052384	591.243	2.09489	0.677528	3.09196	0.00198842	0.0202086	ENSMUSG00000052384	224109	Nrros
ENSMUSG00000022788	288.909	0.683569	0.221115	3.09146	0.00199176	0.0202152	ENSMUSG00000022788	224014	Fgd4
ENSMUSG00000027674	9.60736	4.52161	1.46413	3.08826	0.00201333	0.0203861	ENSMUSG00000027674	58869	Pex5l
ENSMUSG00000009575	5943.17	0.421752	0.136592	3.08768	0.00201726	0.0204021	ENSMUSG00000009575	12419	Cbx5
ENSMUSG00000022180	201.183	1.81546	0.588009	3.08747	0.0020187	0.0204046	ENSMUSG00000022180	50934	Slc7a8
ENSMUSG00000025644	21.968	3.33061	1.07913	3.08639	0.00202601	0.0204545	ENSMUSG00000025644	115487215	Gm7628
ENSMUSG00000022235	63.865	1.41475	0.45836	3.08655	0.00202497	0.0204545	ENSMUSG00000022235	69574	Cmbl
ENSMUSG00000037369	677.838	0.583436	0.18909	3.08549	0.00203214	0.0204925	ENSMUSG00000037369	22289	Kdm6a
ENSMUSG00000078963	25.7228	3.35986	1.089	3.08526	0.00203371	0.0204953	ENSMUSG00000078963	66255	Hsbp1l1
ENSMUSG00000028007	1348.52	0.428452	0.138877	3.08511	0.0020348	0.0204953	ENSMUSG00000028007	76561	Snx7
ENSMUSG00000033174	1127.26	0.738851	0.239667	3.08283	0.00205045	0.0206409	ENSMUSG00000033174	23945	Mgll
ENSMUSG00000043157	136.047	2.11802	0.68712	3.08245	0.00205302	0.0206547	ENSMUSG00000043157	219144	Arl11
ENSMUSG00000067818	9256.8	0.545424	0.177442	3.07381	0.00211341	0.0211881	ENSMUSG00000067818	98932	Myl9
ENSMUSG00000022186	16244	0.423088	0.137693	3.07268	0.00212144	0.0212563	ENSMUSG00000022186	67041	Oxct1
ENSMUSG00000045813	12.1837	4.15281	1.35279	3.06982	0.00214189	0.0214363	ENSMUSG00000045813	NA	Gm9801
ENSMUSG00000020042	148.551	1.00208	0.326958	3.06485	0.00217783	0.0217455	ENSMUSG00000020042	74007	Btbd11
ENSMUSG00000040009	109.632	1.21913	0.397893	3.06397	0.0021842	0.0217965	ENSMUSG00000040009	14687	Gnaz
ENSMUSG00000057457	182.096	1.1399	0.373131	3.05496	0.00225091	0.0224023	ENSMUSG00000057457	18675	Phex
ENSMUSG00000108557	17.4413	3.37451	1.10497	3.05394	0.00225859	0.022448	ENSMUSG00000108557	NA	Gm44835
ENSMUSG00000023911	434.074	0.886686	0.290556	3.05168	0.00227561	0.022594	ENSMUSG00000023911	76917	Flywch2
ENSMUSG00000102657	613.52	0.90641	0.297186	3.04998	0.00228857	0.0226806	ENSMUSG00000102657	NA	Gm37899
ENSMUSG00000098202	329.103	0.943033	0.309184	3.05007	0.00228786	0.0226806	ENSMUSG00000098202	NA	B830012L14Rik
ENSMUSG00000032744	13.47	3.75446	1.2311	3.04967	0.00229089	0.0226906	ENSMUSG00000032744	56198	Heyl
ENSMUSG00000029306	1468.77	2.6091	0.85636	3.04673	0.00231346	0.0228808	ENSMUSG00000029306	15891	Ibsp
ENSMUSG00000059981	1956.6	0.442456	0.145247	3.04623	0.00231728	0.0228994	ENSMUSG00000059981	381921	Taok2
ENSMUSG00000034285	341.986	0.663425	0.217954	3.04388	0.00233551	0.0230532	ENSMUSG00000034285	18082	Nipsnap1
ENSMUSG00000038170	1456.11	0.565332	0.186047	3.03864	0.00237645	0.0233782	ENSMUSG00000038170	83679	Pde4dip
ENSMUSG00000001036	1082.34	0.511321	0.168273	3.03863	0.00237657	0.0233782	ENSMUSG00000001036	13855	Epn2
ENSMUSG00000038518	983.816	0.518349	0.170577	3.0388	0.00237525	0.0233782	ENSMUSG00000038518	16468	Jarid2
ENSMUSG00000029661	559057	0.440612	0.145038	3.0379	0.00238232	0.023405	ENSMUSG00000029661	12843	Col1a2
ENSMUSG00000057604	676.041	0.544438	0.179249	3.03734	0.0023868	0.0234254	ENSMUSG00000057604	30937	Lmcd1
ENSMUSG00000107276	13.1067	3.34621	1.10286	3.03412	0.00241237	0.0236241	ENSMUSG00000107276	NA	Gm42858
ENSMUSG00000068566	7719.98	0.420658	0.138643	3.0341	0.00241252	0.0236241	ENSMUSG00000068566	50918	Myadm
ENSMUSG00000039298	1367.01	0.570283	0.188153	3.03096	0.00243778	0.0238174	ENSMUSG00000039298	214444	Cdk5rap2
ENSMUSG00000031660	3564.09	0.333363	0.110034	3.02964	0.00244844	0.023908	ENSMUSG00000031660	26992	Brd7
ENSMUSG00000055200	1222.77	0.667875	0.220507	3.02882	0.00245512	0.0239596	ENSMUSG00000055200	170742	Sertad3
ENSMUSG00000038843	328.703	1.25582	0.414861	3.02709	0.00246924	0.0240566	ENSMUSG00000038843	14537	Gcnt1
ENSMUSG00000005580	225.107	0.923614	0.305277	3.02549	0.00248227	0.0241563	ENSMUSG00000005580	11515	Adcy9
ENSMUSG00000102758	433.561	0.797638	0.2637	3.02479	0.00248806	0.024199	ENSMUSG00000102758	635702	Naaladl2
ENSMUSG00000001510	15.0936	4.01968	1.32933	3.02385	0.00249582	0.0242607	ENSMUSG00000001510	13393	Dlx3
ENSMUSG00000050105	14.2619	4.50871	1.49237	3.02116	0.00251805	0.0244355	ENSMUSG00000050105	72690	Grrp1
ENSMUSG00000052763	685.537	0.490886	0.162553	3.01985	0.002529	0.0244691	ENSMUSG00000052763	232784	Zfp212
ENSMUSG00000032607	120.505	1.13025	0.374248	3.02005	0.00252734	0.0244691	ENSMUSG00000032607	434437	Amt
ENSMUSG00000069378	219.577	0.904166	0.299491	3.01901	0.00253602	0.0245135	ENSMUSG00000069378	225518	Prdm6
ENSMUSG00000105374	27.6582	2.28239	0.756183	3.0183	0.002542	0.0245575	ENSMUSG00000105374	NA	Gm42551
ENSMUSG00000015944	657.835	0.583875	0.193496	3.0175	0.00254864	0.0245941	ENSMUSG00000015944	80909	Castor2
ENSMUSG00000027375	8.22676	4.95202	1.6418	3.01621	0.00255958	0.0246704	ENSMUSG00000027375	17153	Mal
ENSMUSG00000024395	212.378	0.843489	0.279666	3.01606	0.00256084	0.0246704	ENSMUSG00000024395	225341	Lims2
ENSMUSG00000086389	6.87181	5.14383	1.70644	3.01435	0.00257527	0.024768	ENSMUSG00000086389	NA	Gm15998
ENSMUSG00000031902	2842.78	0.640481	0.21261	3.01247	0.0025913	0.0248805	ENSMUSG00000031902	18021	Nfatc3
ENSMUSG00000022957	6442.13	0.639969	0.212532	3.01116	0.0026025	0.0249742	ENSMUSG00000022957	16443	Itsn1
ENSMUSG00000087365	784.262	0.646034	0.214765	3.00809	0.00262896	0.0251861	ENSMUSG00000087365	NA	C430049B03Rik
ENSMUSG00000027803	4180.66	0.390666	0.129936	3.00661	0.00264177	0.0252649	ENSMUSG00000027803	97064	Wwtr1
ENSMUSG00000042116	200.206	0.815182	0.27135	3.00417	0.00266304	0.0254278	ENSMUSG00000042116	246228	Vwa1
ENSMUSG00000032405	1097.78	0.430487	0.143315	3.00378	0.0026665	0.0254468	ENSMUSG00000032405	56469	Pias1
ENSMUSG00000102428	14.26	4.15426	1.38343	3.00288	0.00267436	0.0254937	ENSMUSG00000102428	93724	Pcdhga12
ENSMUSG00000046876	2029.97	0.485509	0.161702	3.0025	0.00267776	0.0255119	ENSMUSG00000046876	20238	Atxn1
ENSMUSG00000115131	26.6392	3.38999	1.13051	2.99864	0.00271185	0.0257338	ENSMUSG00000115131	NA	Gm49268
ENSMUSG00000105112	466.7	0.830436	0.277108	2.99679	0.00272837	0.0258655	ENSMUSG00000105112	NA	Gm42778
ENSMUSG00000031264	82.5379	2.46082	0.821497	2.99552	0.00273973	0.025959	ENSMUSG00000031264	12229	Btk
ENSMUSG00000024269	840.677	0.484291	0.161781	2.99349	0.00275804	0.0260797	ENSMUSG00000024269	66648	Tpgs2
ENSMUSG00000116056	147.989	0.915173	0.305851	2.99222	0.00276959	0.0261557	ENSMUSG00000116056	NA	Gm4544
ENSMUSG00000022748	459.304	0.666873	0.222882	2.99205	0.00277114	0.026156	ENSMUSG00000022748	66497	Cmss1
ENSMUSG00000062785	32.9192	2.04771	0.684941	2.98962	0.00279327	0.02625	ENSMUSG00000062785	16504	Kcnc3
ENSMUSG00000094153	11.9193	4.00484	1.34072	2.98709	0.00281647	0.0264393	ENSMUSG00000094153	NA	Gm8807
ENSMUSG00000037111	2880.72	0.382183	0.128074	2.98408	0.00284434	0.0266864	ENSMUSG00000037111	73251	Setd7
ENSMUSG00000022240	168.779	1.04972	0.351957	2.98253	0.00285872	0.0268068	ENSMUSG00000022240	18163	Ctnnd2
ENSMUSG00000053646	515.268	0.676881	0.226985	2.98206	0.0028632	0.0268341	ENSMUSG00000053646	235611	Plxnb1
ENSMUSG00000022498	659.781	0.545417	0.1833	2.97554	0.00292475	0.0272924	ENSMUSG00000022498	106200	Txndc11
ENSMUSG00000071103	106.934	1.06506	0.358309	2.97245	0.0029543	0.0275087	ENSMUSG00000071103	69479	1700029J07Rik
ENSMUSG00000100075	13.9986	3.37849	1.1366	2.97245	0.00295431	0.0275087	ENSMUSG00000100075	NA	1700018L02Rik
ENSMUSG00000037822	4410.96	0.643374	0.216466	2.97218	0.00295697	0.0275187	ENSMUSG00000037822	68552	Smim14
ENSMUSG00000020092	219.579	0.959359	0.322866	2.97138	0.00296464	0.0275691	ENSMUSG00000020092	27355	Pald1
ENSMUSG00000025877	34.8418	3.0839	1.03796	2.97112	0.00296719	0.0275691	ENSMUSG00000025877	212032	Hk3
ENSMUSG00000026126	328.683	1.43301	0.482286	2.97128	0.00296559	0.0275691	ENSMUSG00000026126	19253	Ptpn18
ENSMUSG00000028132	38.2433	1.69258	0.569889	2.97001	0.00297788	0.0276387	ENSMUSG00000028132	99887	Tlcd4
ENSMUSG00000099137	13.9908	2.75355	0.927259	2.96956	0.0029823	0.0276649	ENSMUSG00000099137	NA	Gm10603
ENSMUSG00000031983	5061.96	0.518991	0.174859	2.96805	0.00299695	0.0277859	ENSMUSG00000031983	69551	2310022B05Rik
ENSMUSG00000042564	79.9705	1.1845	0.399137	2.96766	0.00300073	0.0278059	ENSMUSG00000042564	75729	Fam227a
ENSMUSG00000055202	102.432	1.04481	0.352692	2.96239	0.00305259	0.0282409	ENSMUSG00000055202	240063	Zfp811
ENSMUSG00000033540	890.604	0.486601	0.164471	2.95858	0.00309065	0.0285166	ENSMUSG00000033540	15932	Idua
ENSMUSG00000109857	37.9444	1.80572	0.610425	2.95813	0.00309507	0.0285421	ENSMUSG00000109857	NA	Gm53058
ENSMUSG00000042323	7201.03	0.379808	0.128469	2.95641	0.00311243	0.0286772	ENSMUSG00000042323	66923	Pbrm1
ENSMUSG00000040430	1409.93	0.420573	0.142261	2.95635	0.00311304	0.0286772	ENSMUSG00000040430	71795	Pitpnc1
ENSMUSG00000042254	40.4891	2.26819	0.767497	2.95531	0.00312352	0.0287583	ENSMUSG00000042254	214425	Cilp
ENSMUSG00000059708	828.148	0.488488	0.165323	2.95475	0.00312922	0.0287955	ENSMUSG00000059708	338351	Akap17b
ENSMUSG00000054723	618.648	0.554709	0.187758	2.95438	0.00313298	0.0288148	ENSMUSG00000054723	106639	Vmac
ENSMUSG00000086600	11.096	4.22448	1.43155	2.95097	0.00316777	0.0290882	ENSMUSG00000086600	NA	C030005K06Rik
ENSMUSG00000083563	26.216	2.37882	0.806369	2.95003	0.00317738	0.0291454	ENSMUSG00000083563	NA	Gm13340
ENSMUSG00000058881	1582.19	0.431258	0.146311	2.94754	0.00320317	0.0293577	ENSMUSG00000058881	329003	Zfp516
ENSMUSG00000034164	131.828	1.04015	0.353037	2.94628	0.00321618	0.0294387	ENSMUSG00000034164	140703	Emid1
ENSMUSG00000039126	274.426	1.17461	0.398897	2.94465	0.00323317	0.0295628	ENSMUSG00000039126	353211	Prune2
ENSMUSG00000039145	1266.22	0.699979	0.237912	2.94217	0.00325918	0.0297338	ENSMUSG00000039145	227541	Camk1d
ENSMUSG00000097885	133.913	1.21553	0.41312	2.9423	0.00325781	0.0297338	ENSMUSG00000097885	NA	5031434O11Rik
ENSMUSG00000034007	1548.89	0.470818	0.16003	2.94205	0.00326048	0.0297338	ENSMUSG00000034007	244891	Scaper
ENSMUSG00000042734	275.249	0.81563	0.277249	2.94187	0.00326241	0.0297356	ENSMUSG00000042734	69480	Ttc9
ENSMUSG00000029781	16328.6	0.308425	0.104846	2.9417	0.00326413	0.0297357	ENSMUSG00000029781	27055	Fkbp9
ENSMUSG00000034647	4245.99	0.414788	0.141072	2.94025	0.00327947	0.0298596	ENSMUSG00000034647	106585	Ankrd12
ENSMUSG00000038173	38.6141	2.24474	0.763522	2.93999	0.00328227	0.0298694	ENSMUSG00000038173	320981	Enpp6
ENSMUSG00000020315	11626.1	0.513767	0.174807	2.93906	0.00329211	0.0299431	ENSMUSG00000020315	20742	Sptbn1
ENSMUSG00000037860	96.3925	2.37359	0.807901	2.93797	0.00330364	0.0300164	ENSMUSG00000037860	383619	Aim2
ENSMUSG00000005237	9.18355	4.91756	1.6747	2.93639	0.0033206	0.0301387	ENSMUSG00000005237	327954	Dnah2
ENSMUSG00000006931	6432.64	0.476696	0.162414	2.93506	0.00333483	0.030252	ENSMUSG00000006931	66180	P3h4
ENSMUSG00000019188	8847.77	0.400975	0.13668	2.93367	0.0033498	0.0303399	ENSMUSG00000019188	14950	H13
ENSMUSG00000028716	428.829	0.771993	0.263372	2.93118	0.00337673	0.0305037	ENSMUSG00000028716	67182	Pdzk1ip1
ENSMUSG00000117674	11.9075	4.15216	1.41648	2.93133	0.00337515	0.0305037	ENSMUSG00000117674	NA	Gm31087
ENSMUSG00000097934	7.09369	4.13018	1.4094	2.93045	0.00338468	0.0305436	ENSMUSG00000097934	77741	6720483E21Rik
ENSMUSG00000002997	1052.96	0.64837	0.22138	2.92877	0.00340304	0.0306789	ENSMUSG00000002997	19088	Prkar2b
ENSMUSG00000041570	1549.1	0.491787	0.167969	2.92784	0.00341322	0.0307262	ENSMUSG00000041570	67886	Camsap2
ENSMUSG00000009828	840.109	0.498231	0.170192	2.92746	0.00341742	0.0307425	ENSMUSG00000009828	56542	Cilk1
ENSMUSG00000106019	422.676	0.624666	0.213494	2.92593	0.00343432	0.0308624	ENSMUSG00000106019	NA	Gm43672
ENSMUSG00000103932	76.5793	1.10876	0.379124	2.92453	0.00344982	0.0309855	ENSMUSG00000103932	NA	Gm36963
ENSMUSG00000034402	7.81761	5.66934	1.94153	2.92004	0.00349981	0.031353	ENSMUSG00000034402	238271	Kcnh5
ENSMUSG00000052920	582.896	0.613975	0.210316	2.9193	0.00350822	0.031412	ENSMUSG00000052920	19091	Prkg1
ENSMUSG00000050926	148.862	0.774813	0.265499	2.91832	0.00351922	0.0314941	ENSMUSG00000050926	245403	Dcaf12l2
ENSMUSG00000074776	26.1256	2.80579	0.961802	2.91722	0.00353165	0.0315606	ENSMUSG00000074776	100038699	Gm10754
ENSMUSG00000055320	3724.61	0.486086	0.166667	2.91651	0.00353969	0.0316117	ENSMUSG00000055320	21676	Tead1
ENSMUSG00000029650	49.6465	1.55175	0.532124	2.91614	0.00354393	0.0316332	ENSMUSG00000029650	71706	Slc46a3
ENSMUSG00000021097	1444.51	0.652706	0.223976	2.91418	0.0035662	0.0317991	ENSMUSG00000021097	94040	Clmn
ENSMUSG00000037625	24.6774	3.56232	1.2226	2.91372	0.00357147	0.0318296	ENSMUSG00000037625	18417	Cldn11
ENSMUSG00000087221	78.9773	1.35503	0.465158	2.91305	0.00357913	0.0318814	ENSMUSG00000087221	NA	BC037032
ENSMUSG00000046463	169.27	0.835232	0.286919	2.91104	0.00360233	0.0320715	ENSMUSG00000046463	NA	5930403N24Rik
ENSMUSG00000004661	187.223	0.941424	0.323473	2.91036	0.0036101	0.0321241	ENSMUSG00000004661	56380	Arid3b
ENSMUSG00000056124	1540.4	0.411095	0.141264	2.91011	0.00361297	0.032133	ENSMUSG00000056124	56386	B4galt6
ENSMUSG00000085438	3329.37	0.330251	0.113511	2.90942	0.00362103	0.0321716	ENSMUSG00000085438	66602	Oip5os1
ENSMUSG00000021400	459.766	0.541177	0.186036	2.909	0.00362589	0.0321982	ENSMUSG00000021400	78903	Wrnip1
ENSMUSG00000030987	1043.83	0.506927	0.174293	2.90848	0.00363187	0.0322313	ENSMUSG00000030987	20866	Stim1
ENSMUSG00000042743	284.057	0.812379	0.279326	2.90836	0.00363335	0.0322313	ENSMUSG00000042743	218544	Sgtb
ENSMUSG00000002803	331.338	0.655128	0.225323	2.90751	0.00364318	0.0322687	ENSMUSG00000002803	399566	Btbd6
ENSMUSG00000052512	388.825	0.746838	0.25694	2.90667	0.00365303	0.0323167	ENSMUSG00000052512	78286	Nav2
ENSMUSG00000048644	580.737	0.649701	0.223529	2.90656	0.00365422	0.0323167	ENSMUSG00000048644	330695	Ctxn1
ENSMUSG00000008384	1289.66	0.510302	0.175768	2.90327	0.00369288	0.0326252	ENSMUSG00000008384	55942	Sertad1
ENSMUSG00000036699	13.0253	4.06419	1.39998	2.90302	0.00369578	0.0326281	ENSMUSG00000036699	72693	Zcchc12
ENSMUSG00000043602	47.8123	1.40093	0.482625	2.90273	0.00369927	0.0326315	ENSMUSG00000043602	193043	Zfp3
ENSMUSG00000085725	8.60571	4.16573	1.43605	2.90083	0.00372173	0.0327626	ENSMUSG00000085725	NA	Gm15873
ENSMUSG00000031482	483.042	0.497218	0.171392	2.90107	0.00371897	0.0327626	ENSMUSG00000031482	18408	Slc25a15
ENSMUSG00000113630	7.01032	4.88425	1.68549	2.89782	0.00375768	0.0329949	ENSMUSG00000113630	73815	4930404H11Rik
ENSMUSG00000022246	2254.67	0.39254	0.135474	2.89752	0.00376126	0.0330095	ENSMUSG00000022246	75646	Rai14
ENSMUSG00000032316	50.7792	1.48563	0.513346	2.89401	0.00380357	0.0333639	ENSMUSG00000032316	102414	Clk3
ENSMUSG00000044950	857.87	0.480109	0.166223	2.88834	0.00387283	0.0339197	ENSMUSG00000044950	70802	Pwwp2a
ENSMUSG00000026781	1110.2	0.469013	0.16243	2.88748	0.00388346	0.0339956	ENSMUSG00000026781	74159	Acbd5
ENSMUSG00000052539	368.805	0.58308	0.202335	2.88176	0.00395461	0.0345133	ENSMUSG00000052539	99470	Magi3
ENSMUSG00000029190	1210.38	0.464382	0.161178	2.88118	0.00396192	0.0345421	ENSMUSG00000029190	320661	D5Ertd579e
ENSMUSG00000023333	11.076	3.7969	1.31783	2.88118	0.00396189	0.0345421	ENSMUSG00000023333	14531	Gcm1
ENSMUSG00000001942	1088.55	0.419255	0.145546	2.88056	0.00396967	0.0345923	ENSMUSG00000001942	22619	Siae
ENSMUSG00000007877	6.33463	4.9089	1.70455	2.87988	0.00397832	0.0346501	ENSMUSG00000007877	21393	Tcap
ENSMUSG00000106707	16.9683	2.54258	0.883018	2.87942	0.0039841	0.0346672	ENSMUSG00000106707	NA	Gm43748
ENSMUSG00000025083	104.156	1.22735	0.426508	2.87767	0.00400618	0.0348401	ENSMUSG00000025083	226250	Afap1l2
ENSMUSG00000053168	31.2502	6.60962	2.29896	2.87505	0.00403966	0.0350429	ENSMUSG00000053168	105892	9030619P08Rik
ENSMUSG00000080772	9.46911	4.29714	1.49511	2.87413	0.00405146	0.0351276	ENSMUSG00000080772	NA	Gm12543
ENSMUSG00000024598	11171.5	0.671875	0.233901	2.87248	0.00407271	0.0352763	ENSMUSG00000024598	14119	Fbn2
ENSMUSG00000086503	2623.38	0.529456	0.184443	2.87057	0.00409739	0.0354723	ENSMUSG00000086503	213742	Xist
ENSMUSG00000055633	649.895	0.497975	0.173506	2.87007	0.00410378	0.0355098	ENSMUSG00000055633	68992	Zfp580
ENSMUSG00000033597	18.3336	3.27722	1.14239	2.86875	0.00412095	0.0356405	ENSMUSG00000033597	268932	Caskin1
ENSMUSG00000032549	336.874	0.856465	0.298648	2.86781	0.00413325	0.035729	ENSMUSG00000032549	270192	Rab6b
ENSMUSG00000046743	818.504	0.642157	0.223932	2.86764	0.00413541	0.0357298	ENSMUSG00000046743	329628	Fat4
ENSMUSG00000039601	1502.15	0.502573	0.175268	2.86745	0.00413795	0.0357338	ENSMUSG00000039601	53901	Rcan2
ENSMUSG00000038239	23.5978	2.7561	0.961366	2.86686	0.00414572	0.035777	ENSMUSG00000038239	15464	Hrc
ENSMUSG00000039704	822.392	0.511287	0.17845	2.86516	0.00416799	0.0359034	ENSMUSG00000039704	320506	Lmbrd2
ENSMUSG00000039809	14.3915	3.04817	1.06412	2.8645	0.00417674	0.0359608	ENSMUSG00000039809	242425	Gabbr2
ENSMUSG00000033788	828.709	0.493297	0.172348	2.86221	0.004207	0.0361852	ENSMUSG00000033788	26903	Dysf
ENSMUSG00000041797	560.89	0.579874	0.202678	2.86105	0.00422234	0.0362991	ENSMUSG00000041797	217262	Abca9
ENSMUSG00000020923	2899.78	0.435014	0.152106	2.85995	0.00423714	0.0364082	ENSMUSG00000020923	21429	Ubtf
ENSMUSG00000096967	11.3719	4.1736	1.46018	2.85829	0.00425934	0.0365444	ENSMUSG00000096967	NA	Gm26621
ENSMUSG00000063109	6.78746	4.7556	1.66445	2.85717	0.00427438	0.0366369	ENSMUSG00000063109	NA	Dgkeos
ENSMUSG00000040606	215.973	0.83796	0.293627	2.85382	0.00431966	0.0370066	ENSMUSG00000040606	71529	Kazn
ENSMUSG00000097162	417.051	0.589824	0.206758	2.85273	0.0043345	0.037056	ENSMUSG00000097162	78329	2310010J17Rik
ENSMUSG00000111894	12.7043	4.89792	1.71701	2.85258	0.00433656	0.037056	ENSMUSG00000111894	NA	Gm47843
ENSMUSG00000034275	240.707	0.937023	0.328497	2.85245	0.0043383	0.037056	ENSMUSG00000034275	235086	Igsf9b
ENSMUSG00000022197	368.577	0.585191	0.205456	2.84825	0.00439606	0.037415	ENSMUSG00000022197	68070	Pdzd2
ENSMUSG00000091764	51.6192	1.35992	0.477917	2.84551	0.00443399	0.0376126	ENSMUSG00000091764	636741	Zfp964
ENSMUSG00000023945	9.83501	4.92612	1.73289	2.84273	0.00447294	0.0378871	ENSMUSG00000023945	63993	Slc5a7
ENSMUSG00000042793	25.1748	2.8293	0.996169	2.84018	0.00450881	0.0381161	ENSMUSG00000042793	329252	Lgr6
ENSMUSG00000032281	100.543	1.51778	0.534661	2.83877	0.00452876	0.0382099	ENSMUSG00000032281	94180	Acsbg1
ENSMUSG00000061451	130.031	0.909537	0.320397	2.83878	0.0045286	0.0382099	ENSMUSG00000061451	381199	Tmem151a
ENSMUSG00000062585	17.5413	3.95452	1.39411	2.8366	0.00455967	0.0383985	ENSMUSG00000062585	12802	Cnr2
ENSMUSG00000068263	18.3286	2.64308	0.932055	2.83576	0.0045717	0.0384594	ENSMUSG00000068263	58229	Efcc1
ENSMUSG00000034614	959.905	0.491458	0.173388	2.83444	0.00459057	0.0385805	ENSMUSG00000034614	216505	Pik3ip1
ENSMUSG00000052085	111.95	1.31191	0.462943	2.83384	0.00459927	0.0386348	ENSMUSG00000052085	76088	Dock8
ENSMUSG00000028957	522.362	0.507047	0.178965	2.83321	0.00460827	0.0386727	ENSMUSG00000028957	18628	Per3
ENSMUSG00000044098	722.137	0.540075	0.190703	2.83202	0.00462549	0.0387984	ENSMUSG00000044098	229675	Rsbn1
ENSMUSG00000057894	570.211	0.523694	0.184991	2.83093	0.00464134	0.0389124	ENSMUSG00000057894	67230	Zfp329
ENSMUSG00000047238	1456.89	0.366138	0.129471	2.82795	0.00468469	0.0392186	ENSMUSG00000047238	75625	Mageh1
ENSMUSG00000039782	301.204	0.679899	0.240449	2.82762	0.0046895	0.0392399	ENSMUSG00000039782	231207	Cpeb2
ENSMUSG00000070733	1029.47	0.523311	0.185199	2.82566	0.00471834	0.0393903	ENSMUSG00000070733	72313	Fryl
ENSMUSG00000103822	13.0848	3.25313	1.15205	2.82378	0.0047461	0.0395355	ENSMUSG00000103822	NA	6030460B20Rik
ENSMUSG00000047888	3071.44	0.501808	0.177715	2.82367	0.00474774	0.0395355	ENSMUSG00000047888	213988	Tnrc6b
ENSMUSG00000041231	282.367	0.641957	0.227389	2.82316	0.00475524	0.0395597	ENSMUSG00000041231	79560	Ublcp1
ENSMUSG00000102246	18.3975	2.54918	0.903017	2.82296	0.00475824	0.0395609	ENSMUSG00000102246	NA	9430037O13Rik
ENSMUSG00000033855	304.925	0.969415	0.343532	2.82191	0.00477391	0.0396577	ENSMUSG00000033855	77057	Ston1
ENSMUSG00000056004	44.9794	2.15421	0.76362	2.82104	0.00478674	0.0397452	ENSMUSG00000056004	231014	Elapor2
ENSMUSG00000064264	1135.72	0.414394	0.146925	2.82044	0.00479583	0.0398015	ENSMUSG00000064264	232969	Zfp428
ENSMUSG00000039485	67.8975	1.26825	0.449825	2.81943	0.0048109	0.0399074	ENSMUSG00000039485	72480	Tspyl4
ENSMUSG00000113836	10.8695	4.54129	1.61195	2.81726	0.00484345	0.0401195	ENSMUSG00000113836	100041420	Gm3325
ENSMUSG00000075270	18.309	4.29276	1.52456	2.81574	0.00486652	0.0402526	ENSMUSG00000075270	241489	Pde11a
ENSMUSG00000029629	2399.9	0.431069	0.153108	2.81546	0.00487071	0.0402679	ENSMUSG00000029629	75725	Phf14
ENSMUSG00000052135	131.786	1.26379	0.448973	2.81485	0.00487996	0.040292	ENSMUSG00000052135	329934	Foxo6
ENSMUSG00000044791	2573.39	0.341112	0.121199	2.81448	0.00488563	0.040314	ENSMUSG00000044791	235626	Setd2
ENSMUSG00000034783	16.0842	4.96484	1.76459	2.8136	0.00489906	0.0404031	ENSMUSG00000034783	246278	Cd207
ENSMUSG00000046070	110.701	0.922691	0.32802	2.81291	0.00490949	0.0404528	ENSMUSG00000046070	16005	Igfals
ENSMUSG00000034271	2556.63	0.348564	0.123994	2.81113	0.00493674	0.0406386	ENSMUSG00000034271	81703	Jdp2
ENSMUSG00000011263	7.80788	5.12826	1.82451	2.81076	0.00494251	0.0406667	ENSMUSG00000011263	74463	Exoc3l2
ENSMUSG00000069792	341.622	0.786168	0.27978	2.80995	0.00495495	0.0407496	ENSMUSG00000069792	100034251	Wfdc17
ENSMUSG00000031980	30.7233	1.90618	0.67849	2.80944	0.00496275	0.0407943	ENSMUSG00000031980	11606	Agt
ENSMUSG00000028053	3467.48	0.398988	0.142143	2.80694	0.00500144	0.0410601	ENSMUSG00000028053	192195	Ash1l
ENSMUSG00000029992	3365.42	0.40938	0.145848	2.80689	0.00500222	0.0410601	ENSMUSG00000029992	14583	Gfpt1
ENSMUSG00000030306	3475.57	0.606548	0.216187	2.80566	0.00502135	0.0411584	ENSMUSG00000030306	387314	Tmtc1
ENSMUSG00000027550	1852.57	0.502105	0.178961	2.80567	0.00502118	0.0411584	ENSMUSG00000027550	71710	Lrrcc1
ENSMUSG00000024780	2540.93	0.353918	0.126169	2.80512	0.0050298	0.0411885	ENSMUSG00000024780	67072	Cdc37l1
ENSMUSG00000021365	1265.43	0.549821	0.196042	2.80461	0.00503769	0.0411944	ENSMUSG00000021365	18003	Nedd9
ENSMUSG00000024176	25.2808	2.24508	0.800432	2.80484	0.00503419	0.0411944	ENSMUSG00000024176	20681	Sox8
ENSMUSG00000032329	1202.59	0.446028	0.159198	2.80172	0.00508317	0.0415466	ENSMUSG00000032329	66867	Hmg20a
ENSMUSG00000015202	925.839	0.542571	0.193796	2.79971	0.00511486	0.0417859	ENSMUSG00000015202	215748	Cnksr3
ENSMUSG00000020044	620.36	0.591481	0.211456	2.79718	0.00515513	0.0420698	ENSMUSG00000020044	21859	Timp3
ENSMUSG00000075701	10210.9	0.410948	0.14696	2.79632	0.00516888	0.0421275	ENSMUSG00000075701	109815	Selenos
ENSMUSG00000051506	84.9561	1.83962	0.65806	2.79551	0.00518174	0.0422124	ENSMUSG00000051506	545030	Wdfy4
ENSMUSG00000024940	418.452	0.575715	0.206049	2.79407	0.0052049	0.042341	ENSMUSG00000024940	16998	Ltbp3
ENSMUSG00000039427	12.3611	3.0789	1.10257	2.79247	0.00523071	0.0425309	ENSMUSG00000039427	208211	Alg1
ENSMUSG00000032036	136.723	0.95197	0.341014	2.79159	0.00524503	0.0426273	ENSMUSG00000032036	67703	Kirrel3
ENSMUSG00000036377	115.726	1.39912	0.501226	2.7914	0.00524809	0.0426321	ENSMUSG00000036377	320827	Cracd
ENSMUSG00000094410	1507.57	0.446018	0.159799	2.79113	0.00525245	0.0426475	ENSMUSG00000094410	667118	Gm38394
ENSMUSG00000024845	4873.57	0.346829	0.124341	2.78933	0.00528178	0.0428453	ENSMUSG00000024845	66990	Tmem134
ENSMUSG00000038236	123.473	0.957708	0.343537	2.78778	0.00530697	0.042989	ENSMUSG00000038236	15404	Hoxa7
ENSMUSG00000028434	432.087	0.528223	0.18965	2.78525	0.0053487	0.043278	ENSMUSG00000028434	54357	Epb41l4b
ENSMUSG00000118809	21.7106	2.59502	0.93208	2.78412	0.00536738	0.0433968	ENSMUSG00000118809	115488732
ENSMUSG00000097662	13.3632	3.60135	1.29361	2.78396	0.00536991	0.0433969	ENSMUSG00000097662	328489	Gm2093
ENSMUSG00000017417	45.5619	2.31942	0.833268	2.78352	0.00537722	0.0434356	ENSMUSG00000017417	72324	Plxdc1
ENSMUSG00000110521	7.40916	4.61999	1.66004	2.78306	0.00538483	0.0434564	ENSMUSG00000110521	NA	Olfr856-ps1
ENSMUSG00000069270	111.099	1.0177	0.36596	2.78089	0.00542097	0.0436868	ENSMUSG00000069270	319164	H2ac6
ENSMUSG00000026782	1357.82	0.435511	0.15663	2.78051	0.00542728	0.0437173	ENSMUSG00000026782	329165	Abi2
ENSMUSG00000034957	374.822	0.608486	0.218945	2.77918	0.00544967	0.0438566	ENSMUSG00000034957	12606	Cebpa
ENSMUSG00000100280	5.94615	4.72113	1.69976	2.77752	0.0054775	0.0439985	ENSMUSG00000100280	NA	Gm28417
ENSMUSG00000025551	20.3693	2.85935	1.02957	2.77723	0.00548248	0.0440132	ENSMUSG00000025551	14169	Fgf14
ENSMUSG00000044022	153.067	0.772888	0.278306	2.77711	0.00548443	0.0440132	ENSMUSG00000044022	93892	Pcdhb21
ENSMUSG00000038344	166.968	0.779227	0.280607	2.77694	0.00548738	0.0440164	ENSMUSG00000038344	353170	Txlng
ENSMUSG00000051950	2471.56	0.431108	0.155299	2.77599	0.00550341	0.0441244	ENSMUSG00000051950	381694	B3glct
ENSMUSG00000033730	191.617	0.88408	0.318553	2.7753	0.00551502	0.044197	ENSMUSG00000033730	13655	Egr3
ENSMUSG00000115543	7.16542	3.62641	1.30728	2.77401	0.00553696	0.0443316	ENSMUSG00000115543	NA	B230362B09Rik
ENSMUSG00000038732	357.153	0.619257	0.22342	2.77172	0.00557615	0.0445447	ENSMUSG00000038732	218121	Mboat1
ENSMUSG00000022488	299.889	1.13007	0.407719	2.7717	0.00557648	0.0445447	ENSMUSG00000022488	105855	Nckap1l
ENSMUSG00000026361	1169.95	0.373225	0.134708	2.77062	0.00559489	0.0446711	ENSMUSG00000026361	214498	Cdc73
ENSMUSG00000020937	195.069	0.714566	0.257937	2.77031	0.00560032	0.0446937	ENSMUSG00000020937	72469	Plcd3
ENSMUSG00000025766	232.269	0.640201	0.231112	2.77009	0.00560415	0.0447037	ENSMUSG00000025766	73852	D3Ertd751e
ENSMUSG00000048376	4432.34	0.648864	0.234321	2.76912	0.00562074	0.0447996	ENSMUSG00000048376	14062	F2r
ENSMUSG00000022261	14036	0.343637	0.124215	2.76647	0.00566671	0.0451401	ENSMUSG00000022261	15529	Sdc2
ENSMUSG00000024013	57.0547	2.51937	0.911119	2.76513	0.00568998	0.0452627	ENSMUSG00000024013	26382	Fgd2
ENSMUSG00000061665	1697.03	0.411048	0.148663	2.76497	0.00569273	0.0452638	ENSMUSG00000061665	12488	Cd2ap
ENSMUSG00000026932	2584.46	0.351844	0.127287	2.76417	0.00570673	0.0452708	ENSMUSG00000026932	67991	Nacc2
ENSMUSG00000104828	11.771	3.57261	1.29242	2.76428	0.0057048	0.0452708	ENSMUSG00000104828	NA	Gm42898
ENSMUSG00000049811	296.023	0.613833	0.222177	2.76281	0.00573053	0.0454197	ENSMUSG00000049811	73873	Fam161a
ENSMUSG00000036362	94.5641	2.16461	0.783491	2.76277	0.00573126	0.0454197	ENSMUSG00000036362	74191	P2ry13
ENSMUSG00000022185	4056.88	0.320822	0.116146	2.76223	0.00574085	0.045437	ENSMUSG00000022185	56215	Acin1
ENSMUSG00000027860	2580.56	0.384877	0.139334	2.76225	0.0057404	0.045437	ENSMUSG00000027860	229658	Vangl1
ENSMUSG00000028152	1006.28	0.489854	0.177654	2.75735	0.00582726	0.0459733	ENSMUSG00000028152	56224	Tspan5
ENSMUSG00000037979	112.518	1.00944	0.366446	2.75467	0.00587519	0.0462668	ENSMUSG00000037979	215707	Ccdc92
ENSMUSG00000039270	402.673	0.604434	0.219444	2.75439	0.00588022	0.0462853	ENSMUSG00000039270	230316	Megf9
ENSMUSG00000086968	310.407	0.685855	0.249047	2.75393	0.00588853	0.0463295	ENSMUSG00000086968	329735	4933431E20Rik
ENSMUSG00000026017	144.119	0.942711	0.342558	2.75198	0.00592365	0.0465687	ENSMUSG00000026017	241066	Carf
ENSMUSG00000021055	21.3634	2.45203	0.89118	2.75145	0.00593326	0.0466177	ENSMUSG00000021055	13983	Esr2
ENSMUSG00000055653	374.976	0.65948	0.239821	2.74989	0.0059616	0.0467978	ENSMUSG00000055653	14734	Gpc3
ENSMUSG00000059857	88.7146	1.53207	0.557202	2.74957	0.00596733	0.0468214	ENSMUSG00000059857	80883	Ntng1
ENSMUSG00000038894	1132.78	0.376137	0.136822	2.7491	0.00597593	0.0468463	ENSMUSG00000038894	384783	Irs2
ENSMUSG00000053965	1274	0.456502	0.166172	2.74717	0.00601116	0.0470797	ENSMUSG00000053965	242202	Pde5a
ENSMUSG00000048616	162.132	0.946015	0.34438	2.74701	0.00601408	0.0470812	ENSMUSG00000048616	18121	Nog
ENSMUSG00000050545	79.5087	1.30105	0.473654	2.74683	0.00601735	0.0470854	ENSMUSG00000050545	207921	Fam228b
ENSMUSG00000061859	221.68	0.751683	0.273751	2.74587	0.00603514	0.0471756	ENSMUSG00000061859	12695	Patj
ENSMUSG00000030557	2853.11	0.410684	0.149563	2.74589	0.00603468	0.0471756	ENSMUSG00000030557	17258	Mef2a
ENSMUSG00000103094	29.1283	2.15034	0.783151	2.74576	0.00603708	0.0471756	ENSMUSG00000103094	NA	Gm37558
ENSMUSG00000111888	6.35406	5.02336	1.82996	2.74507	0.0060498	0.0472224	ENSMUSG00000111888	NA	Gm46212
ENSMUSG00000035877	1423.44	0.512053	0.186579	2.74444	0.00606148	0.0472593	ENSMUSG00000035877	320799	Zhx3
ENSMUSG00000034336	15.0778	2.52754	0.921155	2.74389	0.00607166	0.0473027	ENSMUSG00000034336	226180	Ina
ENSMUSG00000073236	182.191	0.843244	0.307425	2.74293	0.00608937	0.0474125	ENSMUSG00000073236	72326	2500004C02Rik
ENSMUSG00000025739	8.09271	4.99497	1.82258	2.7406	0.00613267	0.047685	ENSMUSG00000025739	64337	Gng13
ENSMUSG00000079671	21.6744	3.12515	1.14039	2.74042	0.00613609	0.0476901	ENSMUSG00000079671	72481	2610203C22Rik
ENSMUSG00000063531	690.249	0.701215	0.255929	2.73988	0.00614615	0.0477039	ENSMUSG00000063531	20349	Sema3e
ENSMUSG00000028558	16.5783	3.19714	1.16789	2.73754	0.00618999	0.0479936	ENSMUSG00000028558	108802	Calr4
ENSMUSG00000027007	639.218	0.416989	0.15241	2.73597	0.00621973	0.0481018	ENSMUSG00000027007	70599	Itprid2
ENSMUSG00000109940	12.5969	3.54258	1.29555	2.73443	0.00624884	0.0482914	ENSMUSG00000109940	NA	Gm45399
ENSMUSG00000039103	4085.6	0.43125	0.157782	2.7332	0.00627221	0.0484209	ENSMUSG00000039103	68810	Nexn
ENSMUSG00000023055	2022.21	0.490878	0.179705	2.73158	0.00630319	0.0485732	ENSMUSG00000023055	67488	Calcoco1
ENSMUSG00000056158	42.8614	2.59917	0.951627	2.73129	0.00630879	0.0485946	ENSMUSG00000056158	72605	Car10
ENSMUSG00000070394	4305.07	0.411021	0.150524	2.7306	0.00632191	0.0486739	ENSMUSG00000070394	69186	Tmem256
ENSMUSG00000004665	14142.3	0.370664	0.135821	2.72905	0.00635161	0.0488155	ENSMUSG00000004665	12798	Cnn2
ENSMUSG00000020053	11564	0.417928	0.153225	2.72754	0.00638077	0.0490177	ENSMUSG00000020053	16000	Igf1
ENSMUSG00000039115	742.991	0.560987	0.205776	2.7262	0.00640688	0.0491749	ENSMUSG00000039115	104099	Itga9
ENSMUSG00000033350	2657.03	0.412936	0.151517	2.72534	0.00642348	0.04928	ENSMUSG00000033350	54371	Chst2
ENSMUSG00000063698	98.144	1.02077	0.374759	2.7238	0.00645356	0.0494449	ENSMUSG00000063698	94281	Sfxn4
ENSMUSG00000032468	915.351	0.468404	0.172034	2.72274	0.00647428	0.0495596	ENSMUSG00000032468	74125	Armc8
ENSMUSG00000053617	3695.35	0.340365	0.125026	2.72235	0.00648199	0.0495966	ENSMUSG00000053617	14218	Sh3pxd2a
ENSMUSG00000039481	91.3692	1.33995	0.492345	2.72157	0.00649736	0.0496922	ENSMUSG00000039481	18188	Nrtn
ENSMUSG00000103693	14.228	3.17003	1.16514	2.72073	0.00651387	0.0497964	ENSMUSG00000103693	NA	Gm37529
ENSMUSG00000036591	1267.39	0.460326	0.169236	2.72002	0.00652778	0.0498806	ENSMUSG00000036591	71435	Arhgap21
ENSMUSG00000027955	2639.45	0.413566	0.152076	2.71947	0.00653867	0.0499195	ENSMUSG00000027955	68659	Gask1b
ENSMUSG00000038074	2731.99	0.449032	0.16516	2.71876	0.00655261	0.0499597	ENSMUSG00000038074	231997	Fkbp14
