# Supplementary material for: The Species Effect: Differential Sphingosine-1-Phosphate Responses in the Bone in Human Versus Mouse
Source: Int J Mol Sci. 2024 May 8;25(10):5118. doi: 10.3390/ijms25105118 (PMC11121697; doi:10.3390/ijms25105118)
Supplement: Supplementary file 1 [file ijms-25-05118-s001.zip › Supplementary Table S2_Significantly upregulated genes by Padj value.xlsx]

## Sheet: Significantly upregulated genes
Column1	baseMean	log2FoldChange	lfcSE	stat	pvalue	padj	ensembl	entrez	mgi_symbol
ENSMUSG00000029380	4836.84	-7.34081	0.199571	-36.7829	3.46184e-296	5.97305e-292	ENSMUSG00000029380	14825	Cxcl1
ENSMUSG00000029371	35610.7	-7.68109	0.209354	-36.6895	1.0753e-294	9.27663e-291	ENSMUSG00000029371	20311	Cxcl5
ENSMUSG00000035373	5819.99	-6.2607	0.20623	-30.3579	1.97795e-202	1.13758e-198	ENSMUSG00000035373	20306	Ccl7
ENSMUSG00000035385	6828.73	-6.04624	0.254456	-23.7615	8.36527e-125	2.88669e-121	ENSMUSG00000035385	20296	Ccl2
ENSMUSG00000020641	962.245	-5.87569	0.28242	-20.8048	3.916e-96	1.12611e-92	ENSMUSG00000020641	58185	Rsad2
ENSMUSG00000105504	434.511	-6.19147	0.353491	-17.5152	1.09709e-68	2.36615e-65	ENSMUSG00000105504	229898	Gbp5
ENSMUSG00000040483	771.205	-3.4282	0.199078	-17.2203	1.86872e-66	3.58253e-63	ENSMUSG00000040483	327959	Xaf1
ENSMUSG00000031762	6560.13	-4.25786	0.254658	-16.7199	9.38173e-63	1.61872e-59	ENSMUSG00000031762	17750	Mt2
ENSMUSG00000040026	117285	-11.166	0.670609	-16.6505	2.99996e-62	4.70557e-59	ENSMUSG00000040026	20210	Saa3
ENSMUSG00000068245	1287.21	-5.27708	0.34228	-15.4175	1.24943e-53	1.79648e-50	ENSMUSG00000068245	219132	Phf11d
ENSMUSG00000029417	712.926	-10.0925	0.673584	-14.9833	9.43985e-51	1.25289e-47	ENSMUSG00000029417	17329	Cxcl9
ENSMUSG00000035356	767.829	-3.36405	0.225325	-14.9298	2.10991e-50	2.60031e-47	ENSMUSG00000035356	80859	Nfkbiz
ENSMUSG00000012428	789.029	-4.22435	0.284709	-14.8374	8.39192e-50	9.65295e-47	ENSMUSG00000012428	117167	Steap4
ENSMUSG00000028270	1580.31	-3.7442	0.256127	-14.6186	2.13912e-48	2.17108e-45	ENSMUSG00000028270	14469	Gbp2
ENSMUSG00000030107	1304.85	-4.97744	0.341678	-14.5676	4.5138e-48	4.32673e-45	ENSMUSG00000030107	24110	Usp18
ENSMUSG00000047735	1313.83	-1.95647	0.134508	-14.5454	6.24872e-48	5.67449e-45	ENSMUSG00000047735	209086	Samd9l
ENSMUSG00000037820	2221.62	-2.01884	0.139325	-14.4902	1.39767e-47	1.20577e-44	ENSMUSG00000037820	21817	Tgm2
ENSMUSG00000073411	30432.5	-3.77588	0.262452	-14.3869	6.25323e-47	4.90424e-44	ENSMUSG00000073411	14964	H2-D1
ENSMUSG00000035042	10964.1	-8.00075	0.573939	-13.9401	3.61509e-44	2.71195e-41	ENSMUSG00000035042	20304	Ccl5
ENSMUSG00000024661	122737	-2.09442	0.150375	-13.9279	4.28463e-44	3.0803e-41	ENSMUSG00000024661	14319	Fth1
ENSMUSG00000043613	8946.75	-6.8827	0.497673	-13.8298	1.68561e-43	1.16334e-40	ENSMUSG00000043613	17392	Mmp3
ENSMUSG00000061353	34874.6	-2.34779	0.175328	-13.3909	6.83851e-41	4.37006e-38	ENSMUSG00000061353	20315	Cxcl12
ENSMUSG00000002289	1254.6	-2.98155	0.224996	-13.2516	4.41813e-40	2.72251e-37	ENSMUSG00000002289	57875	Angptl4
ENSMUSG00000068246	321.817	-5.62355	0.42673	-13.1782	1.17105e-39	6.96735e-37	ENSMUSG00000068246	71898	Apol9b
ENSMUSG00000090942	311.182	-6.00615	0.462439	-12.988	1.4315e-38	8.23301e-36	ENSMUSG00000090942	240328	F830016B08Rik
ENSMUSG00000078853	1257.7	-3.37154	0.261848	-12.876	6.14608e-38	3.31389e-35	ENSMUSG00000078853	16145	Igtp
ENSMUSG00000025492	55615.1	-2.79424	0.218938	-12.7627	2.64862e-37	1.38482e-34	ENSMUSG00000025492	66141	Ifitm3
ENSMUSG00000014813	1297.1	-1.80162	0.143386	-12.5648	3.29663e-36	1.67294e-33	ENSMUSG00000014813	20855	Stc1
ENSMUSG00000024338	3363.75	-3.32508	0.266505	-12.4766	1.00174e-35	4.93831e-33	ENSMUSG00000024338	16913	Psmb8
ENSMUSG00000046718	5212.72	-3.35598	0.275406	-12.1856	3.70976e-34	1.778e-31	ENSMUSG00000046718	69550	Bst2
ENSMUSG00000071637	4373.02	-2.14542	0.176416	-12.1611	5.00485e-34	2.33388e-31	ENSMUSG00000071637	12609	Cebpd
ENSMUSG00000036256	4105.73	-2.64095	0.217782	-12.1266	7.63533e-34	3.46684e-31	ENSMUSG00000036256	29817	Igfbp7
ENSMUSG00000069874	1270.8	-3.5033	0.29191	-12.0013	3.49686e-33	1.54705e-30	ENSMUSG00000069874	54396	Irgm2
ENSMUSG00000050370	939.619	-4.17797	0.348959	-11.9727	4.94129e-33	2.13143e-30	ENSMUSG00000050370	12642	Ch25h
ENSMUSG00000029372	206.526	-4.24858	0.355888	-11.938	7.50344e-33	3.15767e-30	ENSMUSG00000029372	57349	Ppbp
ENSMUSG00000096727	1663.75	-3.57327	0.30208	-11.8289	2.76887e-32	1.11102e-29	ENSMUSG00000096727	16912	Psmb9
ENSMUSG00000106734	326.881	-2.47226	0.210129	-11.7654	5.88393e-32	2.3073e-29	ENSMUSG00000106734	NA	Gm20559
ENSMUSG00000023224	7651.74	-1.85647	0.15816	-11.7379	8.14547e-32	3.12315e-29	ENSMUSG00000023224	12258	Serping1
ENSMUSG00000027078	565.673	-3.05062	0.260331	-11.7182	1.02782e-31	3.8552e-29	ENSMUSG00000027078	56791	Ube2l6
ENSMUSG00000033880	10074.1	-3.13372	0.269298	-11.6366	2.68465e-31	9.45326e-29	ENSMUSG00000033880	19039	Lgals3bp
ENSMUSG00000036718	741.783	-1.80842	0.155753	-11.6108	3.63055e-31	1.25283e-28	ENSMUSG00000036718	231830	Micall2
ENSMUSG00000034422	896.989	-3.3062	0.28535	-11.5865	4.82688e-31	1.633e-28	ENSMUSG00000034422	547253	Parp14
ENSMUSG00000026896	945.553	-2.69188	0.237388	-11.3396	8.35433e-30	2.66936e-27	ENSMUSG00000026896	71586	Ifih1
ENSMUSG00000090272	1873.57	-3.15573	0.279075	-11.3078	1.2007e-29	3.76671e-27	ENSMUSG00000090272	100040462	Mndal
ENSMUSG00000024066	341.244	-3.50413	0.314998	-11.1243	9.55727e-29	2.893e-26	ENSMUSG00000024066	22436	Xdh
ENSMUSG00000026536	839.645	-3.59253	0.325106	-11.0504	2.18359e-28	6.4958e-26	ENSMUSG00000026536	381308	Ifi211
ENSMUSG00000023030	1206.86	-1.54338	0.14094	-10.9506	6.60011e-28	1.93014e-25	ENSMUSG00000023030	18174	Slc11a2
ENSMUSG00000024164	3907.86	-6.37853	0.585174	-10.9002	1.14975e-27	3.3063e-25	ENSMUSG00000024164	12266	C3
ENSMUSG00000026822	22465.9	-8.01577	0.737901	-10.8629	1.73112e-27	4.8965e-25	ENSMUSG00000026822	16819	Lcn2
ENSMUSG00000000386	159.987	-6.05494	0.559786	-10.8165	2.87486e-27	8.00046e-25	ENSMUSG00000000386	NA	Mx1
ENSMUSG00000028037	4803.83	-5.21664	0.486315	-10.7269	7.61294e-27	2.0524e-24	ENSMUSG00000028037	99899	Ifi44
ENSMUSG00000022952	2969.11	-1.78962	0.168406	-10.6268	2.23672e-26	5.93728e-24	ENSMUSG00000022952	12394	Runx1
ENSMUSG00000027832	9271.31	-1.13101	0.106639	-10.606	2.79513e-26	7.30715e-24	ENSMUSG00000027832	19288	Ptx3
ENSMUSG00000020902	488.474	-2.113	0.202245	-10.4477	1.50158e-25	3.8669e-23	ENSMUSG00000020902	18208	Ntn1
ENSMUSG00000056501	1705.62	-2.33088	0.224017	-10.4049	2.35501e-25	5.88888e-23	ENSMUSG00000056501	12608	Cebpb
ENSMUSG00000026222	574.112	-4.10958	0.397947	-10.327	5.32257e-25	1.31194e-22	ENSMUSG00000026222	20684	Sp100
ENSMUSG00000019122	644.949	-2.08795	0.202588	-10.3064	6.59488e-25	1.58039e-22	ENSMUSG00000019122	20308	Ccl9
ENSMUSG00000030220	2467.39	-1.55973	0.151422	-10.3005	7.007e-25	1.65615e-22	ENSMUSG00000030220	11857	Arhgdib
ENSMUSG00000040296	2276.96	-1.8321	0.180473	-10.1517	3.25726e-24	7.2988e-22	ENSMUSG00000040296	230073	Ddx58
ENSMUSG00000053175	633.366	-2.53063	0.249335	-10.1495	3.33082e-24	7.36796e-22	ENSMUSG00000053175	12051	Bcl3
ENSMUSG00000022126	170.603	-6.91435	0.687936	-10.0509	9.10654e-24	1.98892e-21	ENSMUSG00000022126	16365	Acod1
ENSMUSG00000017830	616.673	-4.13176	0.411365	-10.044	9.76045e-24	2.10508e-21	ENSMUSG00000017830	80861	Dhx58
ENSMUSG00000040033	1549.24	-2.5193	0.251048	-10.0351	1.06845e-23	2.27593e-21	ENSMUSG00000040033	20847	Stat2
ENSMUSG00000035929	1013.04	-6.49269	0.647473	-10.0277	1.15136e-23	2.42262e-21	ENSMUSG00000035929	15015	H2-Q4
ENSMUSG00000017929	1729.23	-1.64667	0.165599	-9.94371	2.68628e-23	5.58424e-21	ENSMUSG00000017929	56336	B4galt5
ENSMUSG00000057596	859.197	-3.35259	0.339084	-9.8872	4.73092e-23	9.71754e-21	ENSMUSG00000057596	209387	Trim30d
ENSMUSG00000000275	1277.17	-2.19655	0.225935	-9.72205	2.42837e-22	4.76125e-20	ENSMUSG00000000275	217069	Trim25
ENSMUSG00000028965	123.946	-9.78329	1.00889	-9.69712	3.10133e-22	6.0124e-20	ENSMUSG00000028965	21942	Tnfrsf9
ENSMUSG00000029561	2570.15	-5.82107	0.605218	-9.61813	6.70394e-22	1.28522e-19	ENSMUSG00000029561	23962	Oasl2
ENSMUSG00000006818	4841.23	-2.20393	0.229314	-9.61098	7.18644e-22	1.36258e-19	ENSMUSG00000006818	20656	Sod2
ENSMUSG00000029798	425.442	-3.08555	0.321158	-9.60757	7.42793e-22	1.39306e-19	ENSMUSG00000029798	67138	Herc6
ENSMUSG00000090231	123.712	-6.60436	0.687819	-9.60189	7.84915e-22	1.45623e-19	ENSMUSG00000090231	14962	Cfb
ENSMUSG00000020638	185.716	-4.51435	0.472403	-9.55614	1.22228e-21	2.24353e-19	ENSMUSG00000020638	22169	Cmpk2
ENSMUSG00000021091	819.945	-3.62205	0.379155	-9.55295	1.2605e-21	2.28933e-19	ENSMUSG00000021091	20716	Serpina3n
ENSMUSG00000068606	149.651	-8.74785	0.919364	-9.51512	1.81509e-21	3.26225e-19	ENSMUSG00000068606	225594	Gm4841
ENSMUSG00000001131	24377.1	-2.21645	0.233931	-9.47483	2.67197e-21	4.75281e-19	ENSMUSG00000001131	21857	Timp1
ENSMUSG00000035208	559.043	-3.9907	0.422216	-9.4518	3.33056e-21	5.86382e-19	ENSMUSG00000035208	276950	Slfn8
ENSMUSG00000047747	1440.24	-1.4716	0.156594	-9.39754	5.5854e-21	9.73439e-19	ENSMUSG00000047747	330812	Rnf150
ENSMUSG00000038357	118.363	-3.91544	0.425307	-9.20616	3.37992e-20	5.71736e-18	ENSMUSG00000038357	12796	Camp
ENSMUSG00000037321	2348.93	-2.62178	0.285008	-9.19897	3.61394e-20	6.05388e-18	ENSMUSG00000037321	21354	Tap1
ENSMUSG00000020057	1221.02	-2.02111	0.219749	-9.19736	3.66842e-20	6.08605e-18	ENSMUSG00000020057	71712	Dram1
ENSMUSG00000051279	480.362	-2.15759	0.236093	-9.13875	6.31808e-20	1.00937e-17	ENSMUSG00000051279	242316	Gdf6
ENSMUSG00000021591	1289.71	-1.65448	0.183889	-8.99714	2.31663e-19	3.58075e-17	ENSMUSG00000021591	93692	Glrx
ENSMUSG00000054072	4760.7	-6.92046	0.769216	-8.99678	2.32436e-19	3.58075e-17	ENSMUSG00000054072	60440	Iigp1
ENSMUSG00000074151	211.265	-4.90036	0.54514	-8.98918	2.49074e-19	3.80311e-17	ENSMUSG00000074151	434341	Nlrc5
ENSMUSG00000021242	41118.8	-1.29071	0.14362	-8.98695	2.54184e-19	3.84709e-17	ENSMUSG00000021242	67963	Npc2
ENSMUSG00000042677	443.738	-2.73379	0.305447	-8.95012	3.55102e-19	5.32776e-17	ENSMUSG00000042677	230738	Zc3h12a
ENSMUSG00000049502	1243.97	-2.34168	0.262368	-8.92516	4.4504e-19	6.61958e-17	ENSMUSG00000049502	209200	Dtx3l
ENSMUSG00000025498	3880.91	-6.07699	0.682722	-8.90113	5.52804e-19	8.08312e-17	ENSMUSG00000025498	54123	Irf7
ENSMUSG00000031765	8688.84	-2.11571	0.238205	-8.88192	6.57163e-19	9.37081e-17	ENSMUSG00000031765	17748	Mt1
ENSMUSG00000003541	3648.42	-1.32337	0.149482	-8.85304	8.51663e-19	1.20447e-16	ENSMUSG00000003541	15937	Ier3
ENSMUSG00000090523	917.993	-2.05744	0.233747	-8.80198	1.34418e-18	1.88558e-16	ENSMUSG00000090523	71683	Gypc
ENSMUSG00000070327	870.51	-2.79026	0.317571	-8.78625	1.5463e-18	2.13439e-16	ENSMUSG00000070327	672511	Rnf213
ENSMUSG00000066363	526.226	-8.68939	0.989289	-8.78347	1.58501e-18	2.17045e-16	ENSMUSG00000066363	238393	Serpina3f
ENSMUSG00000021025	12876	-1.57575	0.180364	-8.73651	2.40424e-18	3.24085e-16	ENSMUSG00000021025	18035	Nfkbia
ENSMUSG00000061232	35410.9	-4.40543	0.506504	-8.69771	3.38656e-18	4.52959e-16	ENSMUSG00000061232	14972	H2-K1
ENSMUSG00000026069	2301.58	-2.29323	0.263887	-8.6902	3.618e-18	4.80193e-16	ENSMUSG00000026069	17082	Il1rl1
ENSMUSG00000024371	161.411	-5.00427	0.57629	-8.6836	3.83454e-18	5.05047e-16	ENSMUSG00000024371	12263	C2
ENSMUSG00000020010	71.2446	-9.11055	1.04998	-8.67688	4.06791e-18	5.31725e-16	ENSMUSG00000020010	26464	Vnn3
ENSMUSG00000008540	438.575	-2.32372	0.268929	-8.64066	5.58895e-18	7.14309e-16	ENSMUSG00000008540	56615	Mgst1
ENSMUSG00000035692	13989.7	-5.3297	0.619109	-8.60867	7.39164e-18	9.30915e-16	ENSMUSG00000035692	100038882	Isg15
ENSMUSG00000022146	1626.72	-1.31903	0.153762	-8.57842	9.61872e-18	1.20262e-15	ENSMUSG00000022146	18414	Osmr
ENSMUSG00000072621	147.829	-2.87457	0.33584	-8.55934	1.13517e-17	1.39902e-15	ENSMUSG00000072621	237887	Slfn10-ps
ENSMUSG00000090958	1400.85	-1.57685	0.185101	-8.51883	1.6117e-17	1.94463e-15	ENSMUSG00000090958	434215	Lrrc32
ENSMUSG00000038580	106.783	-4.41718	0.519565	-8.50169	1.86857e-17	2.23891e-15	ENSMUSG00000038580	20287	Sct
ENSMUSG00000027962	8383.09	-1.43713	0.169783	-8.46452	2.57219e-17	3.06072e-15	ENSMUSG00000027962	22329	Vcam1
ENSMUSG00000006014	235.528	-2.91376	0.346983	-8.3974	4.56479e-17	5.35788e-15	ENSMUSG00000006014	96875	Prg4
ENSMUSG00000037580	207.469	-2.95404	0.352186	-8.38772	4.95658e-17	5.77843e-15	ENSMUSG00000037580	14528	Gch1
ENSMUSG00000023341	201.796	-4.57475	0.54863	-8.3385	7.52393e-17	8.71261e-15	ENSMUSG00000023341	17858	Mx2
ENSMUSG00000053113	1690.07	-1.35245	0.162529	-8.32131	8.70002e-17	9.94107e-15	ENSMUSG00000053113	12702	Socs3
ENSMUSG00000045312	1560.71	-2.12175	0.25527	-8.31178	9.42768e-17	1.06317e-14	ENSMUSG00000045312	218454	Lhfpl2
ENSMUSG00000033355	3750.18	-4.24948	0.51251	-8.29151	1.1182e-16	1.25282e-14	ENSMUSG00000033355	67775	Rtp4
ENSMUSG00000037921	323.338	-3.76533	0.454722	-8.2805	1.22656e-16	1.36536e-14	ENSMUSG00000037921	234311	Ddx60
ENSMUSG00000055413	74.0858	-8.05699	0.973585	-8.27559	1.27822e-16	1.41375e-14	ENSMUSG00000055413	15016	H2-Q5
ENSMUSG00000041736	3594.32	-1.18534	0.143447	-8.26327	1.41732e-16	1.5576e-14	ENSMUSG00000041736	12257	Tspo
ENSMUSG00000024778	633.255	-1.34314	0.162854	-8.24749	1.61754e-16	1.75528e-14	ENSMUSG00000024778	14102	Fas
ENSMUSG00000027995	647.552	-2.64713	0.321514	-8.23331	1.82112e-16	1.96386e-14	ENSMUSG00000027995	24088	Tlr2
ENSMUSG00000095620	61.0049	-7.40298	0.900822	-8.21803	2.06877e-16	2.21706e-14	ENSMUSG00000095620	76770	Csta2
ENSMUSG00000022015	296.896	-3.07515	0.376334	-8.17132	3.05042e-16	3.22895e-14	ENSMUSG00000022015	21943	Tnfsf11
ENSMUSG00000056116	762.257	-2.73043	0.337313	-8.09465	5.74298e-16	6.00541e-14	ENSMUSG00000056116	15039	H2-T22
ENSMUSG00000027737	114.712	-4.80764	0.594874	-8.08178	6.3829e-16	6.63437e-14	ENSMUSG00000027737	26570	Slc7a11
ENSMUSG00000022575	539.413	-1.67337	0.208232	-8.03608	9.27598e-16	9.35952e-14	ENSMUSG00000022575	69146	Gsdmd
ENSMUSG00000074934	3475.19	-2.31687	0.288639	-8.02688	9.99841e-16	1.00298e-13	ENSMUSG00000074934	23892	Grem1
ENSMUSG00000026574	5153.77	-0.894965	0.112389	-7.96313	1.67745e-15	1.65386e-13	ENSMUSG00000026574	56429	Dpt
ENSMUSG00000097804	109.074	-6.01392	0.75538	-7.96145	1.70041e-15	1.66698e-13	ENSMUSG00000097804	102634900	Gm16685
ENSMUSG00000018920	1141.79	-1.77443	0.222942	-7.95915	1.73219e-15	1.68854e-13	ENSMUSG00000018920	66102	Cxcl16
ENSMUSG00000040253	2478.53	-3.84283	0.486752	-7.89484	2.90681e-15	2.78634e-13	ENSMUSG00000040253	229900	Gbp7
ENSMUSG00000027611	781.843	-1.57302	0.199547	-7.88293	3.19792e-15	3.04845e-13	ENSMUSG00000027611	19124	Procr
ENSMUSG00000025647	9823.1	-1.18067	0.149982	-7.87212	3.48688e-15	3.30564e-13	ENSMUSG00000025647	66940	Shisa5
ENSMUSG00000032271	744.939	-1.625	0.206829	-7.85674	3.94249e-15	3.69695e-13	ENSMUSG00000032271	18113	Nnmt
ENSMUSG00000079014	52.5899	-8.59349	1.09499	-7.84805	4.22569e-15	3.94109e-13	ENSMUSG00000079014	628900	Serpina3i
ENSMUSG00000012519	462.108	-2.18735	0.278796	-7.8457	4.30559e-15	3.99401e-13	ENSMUSG00000012519	74568	Mlkl
ENSMUSG00000023947	447.832	-2.22081	0.283611	-7.83048	4.86017e-15	4.48435e-13	ENSMUSG00000023947	18037	Nfkbie
ENSMUSG00000078920	1361.05	-5.38178	0.690795	-7.7907	6.66368e-15	6.05132e-13	ENSMUSG00000078920	15953	Ifi47
ENSMUSG00000027580	317.89	-2.66447	0.342163	-7.78712	6.8552e-15	6.19265e-13	ENSMUSG00000027580	229003	Helz2
ENSMUSG00000046818	2978.53	-1.42476	0.183242	-7.7753	7.52691e-15	6.75483e-13	ENSMUSG00000046818	73284	Ddit4l
ENSMUSG00000022367	720.357	-2.30924	0.297015	-7.77481	7.55582e-15	6.75483e-13	ENSMUSG00000022367	15117	Has2
ENSMUSG00000017723	1097.67	-2.01469	0.260944	-7.72076	1.15635e-14	1.02844e-12	ENSMUSG00000017723	67701	Wfdc2
ENSMUSG00000029605	166.765	-3.76273	0.488017	-7.71023	1.25586e-14	1.11121e-12	ENSMUSG00000029605	23961	Oas1b
ENSMUSG00000062488	1486.3	-4.59138	0.59597	-7.70404	1.3183e-14	1.16051e-12	ENSMUSG00000062488	667370	Ifit3b
ENSMUSG00000025225	894.217	-1.13928	0.148213	-7.68676	1.5091e-14	1.30844e-12	ENSMUSG00000025225	18034	Nfkb2
ENSMUSG00000027514	1263.53	-7.81663	1.01934	-7.66833	1.74254e-14	1.50329e-12	ENSMUSG00000027514	58203	Zbp1
ENSMUSG00000029826	1234.48	-1.60609	0.209625	-7.66173	1.83445e-14	1.5747e-12	ENSMUSG00000029826	78781	Zc3hav1
ENSMUSG00000027800	4766.86	-1.30968	0.171558	-7.63405	2.2749e-14	1.93356e-12	ENSMUSG00000027800	17112	Tm4sf1
ENSMUSG00000026072	1353.77	-1.242	0.162773	-7.63025	2.34291e-14	1.9816e-12	ENSMUSG00000026072	16177	Il1r1
ENSMUSG00000022156	96.5438	-5.21522	0.684203	-7.62232	2.49153e-14	2.09702e-12	ENSMUSG00000022156	14942	Gzme
ENSMUSG00000001123	2656.41	-1.64814	0.216452	-7.61432	2.65083e-14	2.20953e-12	ENSMUSG00000001123	16859	Lgals9
ENSMUSG00000034459	9513.96	-6.04725	0.794134	-7.6149	2.63901e-14	2.20953e-12	ENSMUSG00000034459	15957	Ifit1
ENSMUSG00000018906	1828.32	-1.32895	0.174671	-7.60831	2.77707e-14	2.30363e-12	ENSMUSG00000018906	18452	P4ha2
ENSMUSG00000034947	1261.55	-1.08966	0.143508	-7.59303	3.12513e-14	2.57995e-12	ENSMUSG00000034947	217203	Tmem106a
ENSMUSG00000024087	2336.18	-1.49382	0.198367	-7.53057	5.05192e-14	4.1116e-12	ENSMUSG00000024087	13078	Cyp1b1
ENSMUSG00000017057	1502.93	-1.78407	0.237146	-7.5231	5.34923e-14	4.31288e-12	ENSMUSG00000017057	16164	Il13ra1
ENSMUSG00000039236	716.636	-2.31035	0.308906	-7.47911	7.48255e-14	5.97704e-12	ENSMUSG00000039236	57444	Isg20
ENSMUSG00000028268	1745.35	-4.53901	0.609273	-7.44987	9.34338e-14	7.42906e-12	ENSMUSG00000028268	55932	Gbp3
ENSMUSG00000031024	811.089	-1.38586	0.186756	-7.42069	1.16513e-13	9.05544e-12	ENSMUSG00000031024	76954	Denn2b
ENSMUSG00000074896	3953.97	-4.98404	0.672391	-7.41242	1.24016e-13	9.59538e-12	ENSMUSG00000074896	15959	Ifit3
ENSMUSG00000024610	133.047	-3.767	0.508574	-7.40697	1.29216e-13	9.95312e-12	ENSMUSG00000024610	16149	Cd74
ENSMUSG00000039997	1757.54	-4.29196	0.579637	-7.40457	1.31579e-13	1.00901e-11	ENSMUSG00000039997	15950	Ifi203
ENSMUSG00000028599	489.706	-1.61638	0.218423	-7.4002	1.35984e-13	1.03817e-11	ENSMUSG00000028599	21938	Tnfrsf1b
ENSMUSG00000018899	1710.38	-1.11299	0.151491	-7.34697	2.02756e-13	1.53437e-11	ENSMUSG00000018899	16362	Irf1
ENSMUSG00000041120	6149.4	-1.08856	0.148419	-7.33441	2.22705e-13	1.67797e-11	ENSMUSG00000041120	17965	Nbl1
ENSMUSG00000030187	35.2611	-8.4049	1.14745	-7.32486	2.39141e-13	1.79398e-11	ENSMUSG00000030187	16633	Klra2
ENSMUSG00000029082	92.4516	-3.66801	0.502408	-7.30086	2.85931e-13	2.1357e-11	ENSMUSG00000029082	12182	Bst1
ENSMUSG00000000730	70.5822	-4.322	0.592479	-7.29477	2.99174e-13	2.21543e-11	ENSMUSG00000000730	54427	Dnmt3l
ENSMUSG00000032487	835.435	-2.32007	0.319301	-7.2661	3.70023e-13	2.70525e-11	ENSMUSG00000032487	19225	Ptgs2
ENSMUSG00000078349	280.288	-2.10497	0.289722	-7.26547	3.71735e-13	2.7063e-11	ENSMUSG00000078349	100382	AW011738
ENSMUSG00000044734	1606.98	-2.0627	0.28497	-7.23833	4.54251e-13	3.29313e-11	ENSMUSG00000044734	66222	Serpinb1a
ENSMUSG00000024737	141.68	-3.03904	0.419957	-7.23655	4.6024e-13	3.32258e-11	ENSMUSG00000024737	65221	Slc15a3
ENSMUSG00000036067	88.3296	-3.50097	0.48384	-7.23581	4.62745e-13	3.32675e-11	ENSMUSG00000036067	227659	Slc2a6
ENSMUSG00000030966	241.023	-1.92125	0.265662	-7.23192	4.76199e-13	3.40927e-11	ENSMUSG00000030966	20821	Trim21
ENSMUSG00000030748	2804.26	-1.74411	0.241569	-7.21991	5.20213e-13	3.69372e-11	ENSMUSG00000030748	16190	Il4ra
ENSMUSG00000026475	240.569	-2.54243	0.352496	-7.21264	5.48771e-13	3.88053e-11	ENSMUSG00000026475	19734	Rgs16
ENSMUSG00000058624	248.938	-1.74183	0.241848	-7.20216	5.92683e-13	4.17394e-11	ENSMUSG00000058624	14544	Gda
ENSMUSG00000033965	2063.48	-1.45199	0.202184	-7.1815	6.89526e-13	4.83621e-11	ENSMUSG00000033965	20502	Slc16a2
ENSMUSG00000069911	32.8708	-8.33087	1.16039	-7.17938	7.0026e-13	4.89161e-11	ENSMUSG00000069911	574403	Insyn2b
ENSMUSG00000028633	2602.02	-1.27709	0.178223	-7.16567	7.74052e-13	5.38528e-11	ENSMUSG00000028633	51797	Ctps
ENSMUSG00000060519	2136.45	-1.90054	0.266786	-7.12382	1.04977e-12	7.15921e-11	ENSMUSG00000060519	30935	Tor3a
ENSMUSG00000010358	1172.23	-1.95314	0.274308	-7.12027	1.07719e-12	7.28857e-11	ENSMUSG00000010358	70110	Ifi35
ENSMUSG00000024140	3209.29	-2.00902	0.282384	-7.11447	1.12342e-12	7.57168e-11	ENSMUSG00000024140	13819	Epas1
ENSMUSG00000031722	4690.41	-5.98646	0.841575	-7.1134	1.13219e-12	7.60107e-11	ENSMUSG00000031722	15439	Hp
ENSMUSG00000037440	528.934	-2.58481	0.363826	-7.10453	1.20734e-12	8.07421e-11	ENSMUSG00000037440	22361	Vnn1
ENSMUSG00000030921	3016.5	-4.5457	0.64147	-7.08637	1.37675e-12	9.17158e-11	ENSMUSG00000030921	20128	Trim30a
ENSMUSG00000070034	131.608	-3.41112	0.482985	-7.06259	1.63433e-12	1.0722e-10	ENSMUSG00000070034	109032	Sp110
ENSMUSG00000054203	62.9954	-5.54275	0.785166	-7.05933	1.67302e-12	1.09342e-10	ENSMUSG00000054203	226695	Ifi205
ENSMUSG00000033213	101.674	-4.98882	0.714756	-6.97976	2.95681e-12	1.91792e-10	ENSMUSG00000033213	433470	AA467197
ENSMUSG00000063268	593.554	-2.01202	0.288289	-6.97917	2.96929e-12	1.91881e-10	ENSMUSG00000063268	671535	Parp10
ENSMUSG00000031596	2344.68	-1.69081	0.243263	-6.95054	3.63882e-12	2.34269e-10	ENSMUSG00000031596	11988	Slc7a2
ENSMUSG00000040328	40.8353	-7.76067	1.11836	-6.93933	3.9395e-12	2.52684e-10	ENSMUSG00000040328	18356	Olfr56
ENSMUSG00000046879	512.491	-2.58608	0.372744	-6.93794	3.97856e-12	2.54245e-10	ENSMUSG00000046879	15944	Irgm1
ENSMUSG00000002602	4379.25	-1.1533	0.166472	-6.92785	4.27285e-12	2.71043e-10	ENSMUSG00000002602	26362	Axl
ENSMUSG00000062300	949.589	-1.44342	0.208396	-6.92633	4.3189e-12	2.72961e-10	ENSMUSG00000062300	19294	Nectin2
ENSMUSG00000032690	411.923	-6.28472	0.909172	-6.91257	4.75938e-12	2.98612e-10	ENSMUSG00000032690	246728	Oas2
ENSMUSG00000035493	3202.91	-1.9852	0.28743	-6.90673	4.95956e-12	3.10045e-10	ENSMUSG00000035493	21810	Tgfbi
ENSMUSG00000026981	10308.1	-1.13355	0.164141	-6.90596	4.98644e-12	3.10599e-10	ENSMUSG00000026981	16181	Il1rn
ENSMUSG00000029470	1605.68	-1.28922	0.18707	-6.89163	5.51577e-12	3.39889e-10	ENSMUSG00000029470	18438	P2rx4
ENSMUSG00000029156	1216.98	-0.999291	0.145576	-6.86438	6.67788e-12	4.10036e-10	ENSMUSG00000029156	24051	Sgcb
ENSMUSG00000022971	1255.82	-1.16655	0.171108	-6.81762	9.2559e-12	5.62328e-10	ENSMUSG00000022971	15976	Ifnar2
ENSMUSG00000021281	3899.62	-1.09622	0.161083	-6.80527	1.00859e-11	6.10602e-10	ENSMUSG00000021281	21928	Tnfaip2
ENSMUSG00000035273	63.9784	-2.97842	0.439672	-6.77419	1.25104e-11	7.52107e-10	ENSMUSG00000035273	15442	Hpse
ENSMUSG00000070427	394.993	-2.75628	0.40797	-6.75607	1.41781e-11	8.4647e-10	ENSMUSG00000070427	16068	Il18bp
ENSMUSG00000021831	740.222	-1.27122	0.188646	-6.73867	1.59848e-11	9.47773e-10	ENSMUSG00000021831	50527	Ero1a
ENSMUSG00000069793	582.807	-1.43436	0.214595	-6.68403	2.32464e-11	1.36892e-09	ENSMUSG00000069793	237886	Slfn9
ENSMUSG00000027951	315.264	-2.36782	0.354615	-6.67716	2.43618e-11	1.42972e-09	ENSMUSG00000027951	56417	Adar
ENSMUSG00000060459	158.367	-3.53842	0.530638	-6.66823	2.58904e-11	1.51428e-09	ENSMUSG00000060459	385643	Kng2
ENSMUSG00000032294	12351.7	-1.04246	0.156688	-6.65309	2.87003e-11	1.66732e-09	ENSMUSG00000032294	18746	Pkm
ENSMUSG00000041481	590.015	-7.21317	1.08427	-6.65257	2.8801e-11	1.66756e-09	ENSMUSG00000041481	20715	Serpina3g
ENSMUSG00000023367	5057.92	-1.2556	0.190701	-6.58415	4.57497e-11	2.60517e-09	ENSMUSG00000023367	66058	Tmem176a
ENSMUSG00000046314	339.958	-1.61291	0.245736	-6.56359	5.25261e-11	2.9812e-09	ENSMUSG00000046314	217517	Stxbp6
ENSMUSG00000115338	498.494	-1.54854	0.236387	-6.55087	5.72018e-11	3.23594e-09	ENSMUSG00000115338	18950	Pnp
ENSMUSG00000019923	1843.03	-0.918833	0.140393	-6.54471	5.96113e-11	3.36122e-09	ENSMUSG00000019923	52696	Zwint
ENSMUSG00000057346	388.115	-5.21819	0.797752	-6.54112	6.1061e-11	3.42061e-09	ENSMUSG00000057346	223672	Apol9a
ENSMUSG00000037035	457.891	-1.96119	0.30109	-6.51362	7.336e-11	4.08308e-09	ENSMUSG00000037035	16324	Inhbb
ENSMUSG00000082292	44.5311	-5.33374	0.820975	-6.49684	8.20247e-11	4.52158e-09	ENSMUSG00000082292	NA	Gm12250
ENSMUSG00000036912	40.6124	-6.99268	1.07784	-6.48769	8.71632e-11	4.78953e-09	ENSMUSG00000036912	330890	Piwil4
ENSMUSG00000040133	613.296	-1.36568	0.210564	-6.48581	8.82567e-11	4.83422e-09	ENSMUSG00000040133	381413	Gpr176
ENSMUSG00000063458	126.565	-2.68975	0.414961	-6.48193	9.05588e-11	4.94463e-09	ENSMUSG00000063458	76633	Lrmda
ENSMUSG00000067586	2941.95	-0.890189	0.137823	-6.45895	1.05432e-10	5.72051e-09	ENSMUSG00000067586	13610	S1pr3
ENSMUSG00000009185	273.602	-7.61948	1.18156	-6.44864	1.12861e-10	6.1044e-09	ENSMUSG00000009185	20307	Ccl8
ENSMUSG00000021133	1317.13	-1.47726	0.229592	-6.4343	1.24043e-10	6.68825e-09	ENSMUSG00000021133	217684	Susd6
ENSMUSG00000031897	1688.28	-1.55587	0.242245	-6.42271	1.33867e-10	7.19546e-09	ENSMUSG00000031897	19171	Psmb10
ENSMUSG00000056671	340.937	-1.33321	0.20783	-6.41491	1.40903e-10	7.55013e-09	ENSMUSG00000056671	77619	Prelid2
ENSMUSG00000035673	2558.48	-1.03542	0.161588	-6.40778	1.47657e-10	7.88754e-09	ENSMUSG00000035673	216161	Sbno2
ENSMUSG00000079017	3205.96	-4.16105	0.651288	-6.38895	1.67027e-10	8.86736e-09	ENSMUSG00000079017	76933	Ifi27l2a
ENSMUSG00000026946	693.482	-1.4798	0.231679	-6.3873	1.68843e-10	8.93626e-09	ENSMUSG00000026946	64685	Nmi
ENSMUSG00000056054	35.8287	-6.74209	1.05604	-6.38429	1.72198e-10	9.08595e-09	ENSMUSG00000056054	20201	S100a8
ENSMUSG00000002325	2557.81	-1.27574	0.200997	-6.34705	2.1948e-10	1.14755e-08	ENSMUSG00000002325	16391	Irf9
ENSMUSG00000024085	1682.33	-0.854978	0.135566	-6.30671	2.8503e-10	1.4813e-08	ENSMUSG00000024085	17158	Man2a1
ENSMUSG00000016206	211.115	-2.4185	0.384129	-6.29607	3.05282e-10	1.58178e-08	ENSMUSG00000016206	14991	H2-M3
ENSMUSG00000079505	52.4469	-5.99587	0.95265	-6.29389	3.09611e-10	1.59941e-08	ENSMUSG00000079505	NA	Gm11131
ENSMUSG00000076441	698.891	-1.55604	0.247358	-6.29064	3.16159e-10	1.62836e-08	ENSMUSG00000076441	11898	Ass1
ENSMUSG00000032000	294.994	-1.47483	0.234608	-6.28633	3.25062e-10	1.66544e-08	ENSMUSG00000032000	11796	Birc3
ENSMUSG00000022587	17836.9	-3.1873	0.507374	-6.28194	3.34371e-10	1.70688e-08	ENSMUSG00000022587	17069	Ly6e
ENSMUSG00000073599	201.925	-1.83006	0.291507	-6.27793	3.43103e-10	1.74628e-08	ENSMUSG00000073599	68545	Ecscr
ENSMUSG00000024308	14104.4	-1.33087	0.212115	-6.27428	3.51267e-10	1.77735e-08	ENSMUSG00000024308	21356	Tapbp
ENSMUSG00000033307	5792.09	-1.15063	0.183561	-6.26837	3.64852e-10	1.84069e-08	ENSMUSG00000033307	17319	Mif
ENSMUSG00000079363	38.7447	-7.12769	1.13864	-6.2598	3.85461e-10	1.93335e-08	ENSMUSG00000079363	17472	Gbp4
ENSMUSG00000029063	1839.73	-0.832888	0.133146	-6.25545	3.96382e-10	1.98237e-08	ENSMUSG00000029063	192185	Nadk
ENSMUSG00000026088	1742.71	-1.08336	0.173425	-6.24682	4.18883e-10	2.08885e-08	ENSMUSG00000026088	69028	Mitd1
ENSMUSG00000041135	624.978	-1.46745	0.235801	-6.22326	4.86926e-10	2.42116e-08	ENSMUSG00000041135	192656	Ripk2
ENSMUSG00000032596	517.317	-2.07608	0.333662	-6.2221	4.9055e-10	2.4252e-08	ENSMUSG00000032596	74153	Uba7
ENSMUSG00000056749	787.281	-1.20224	0.193636	-6.20878	5.33982e-10	2.63238e-08	ENSMUSG00000056749	18030	Nfil3
ENSMUSG00000018927	481.088	-4.4462	0.718073	-6.19185	5.94623e-10	2.8982e-08	ENSMUSG00000018927	20305	Ccl6
ENSMUSG00000054855	368.537	-1.62883	0.263262	-6.18712	6.12728e-10	2.97803e-08	ENSMUSG00000054855	223881	Rnd1
ENSMUSG00000097194	42.279	-6.74686	1.09437	-6.16508	7.04457e-10	3.41424e-08	ENSMUSG00000097194	NA	9330175E14Rik
ENSMUSG00000038059	1307.45	-1.36571	0.221945	-6.15336	7.58593e-10	3.66632e-08	ENSMUSG00000038059	106878	Smim3
ENSMUSG00000066258	644.755	-1.46316	0.238424	-6.13678	8.42098e-10	4.05853e-08	ENSMUSG00000066258	76681	Trim12a
ENSMUSG00000073555	1279.95	-6.58051	1.07245	-6.13596	8.46491e-10	4.06834e-08	ENSMUSG00000073555	240327	Gm4951
ENSMUSG00000073489	956.342	-5.7605	0.939571	-6.13099	8.73322e-10	4.18564e-08	ENSMUSG00000073489	15951	Ifi204
ENSMUSG00000020186	4784.78	-1.00499	0.163939	-6.13025	8.77417e-10	4.19361e-08	ENSMUSG00000020186	13008	Csrp2
ENSMUSG00000022108	34055.6	-0.858525	0.140455	-6.11243	9.8122e-10	4.67679e-08	ENSMUSG00000022108	16432	Itm2b
ENSMUSG00000024529	41443.4	-0.848356	0.13893	-6.10636	1.0193e-09	4.83159e-08	ENSMUSG00000024529	16948	Lox
ENSMUSG00000022500	2676.34	-0.878961	0.14404	-6.10221	1.04614e-09	4.94524e-08	ENSMUSG00000022500	56722	Litaf
ENSMUSG00000027208	3137.57	-1.07724	0.176777	-6.09377	1.1028e-09	5.19881e-08	ENSMUSG00000027208	14178	Fgf7
ENSMUSG00000067235	22.1044	-7.66385	1.25794	-6.09239	1.11237e-09	5.22965e-08	ENSMUSG00000067235	15007	H2-Q10
ENSMUSG00000028381	1643.37	-1.60865	0.264152	-6.08988	1.12998e-09	5.29801e-08	ENSMUSG00000028381	22234	Ugcg
ENSMUSG00000031429	1224.35	-0.840643	0.13822	-6.08191	1.18756e-09	5.52296e-08	ENSMUSG00000031429	53380	Psmd10
ENSMUSG00000009585	971.452	-1.16557	0.192162	-6.06555	1.31507e-09	6.08316e-08	ENSMUSG00000009585	80287	Apobec3
ENSMUSG00000037418	96.6383	-2.54023	0.418881	-6.06433	1.32505e-09	6.11292e-08	ENSMUSG00000037418	24115	Best1
ENSMUSG00000016024	2288.98	-1.10585	0.182414	-6.06232	1.34175e-09	6.17348e-08	ENSMUSG00000016024	16803	Lbp
ENSMUSG00000024678	166.559	-3.7785	0.627684	-6.01974	1.747e-09	7.9323e-08	ENSMUSG00000024678	66607	Ms4a4d
ENSMUSG00000028967	953.426	-1.29732	0.216677	-5.98736	2.13279e-09	9.6333e-08	ENSMUSG00000028967	74155	Errfi1
ENSMUSG00000059146	1008.6	-0.963207	0.161188	-5.97569	2.29118e-09	1.02948e-07	ENSMUSG00000059146	18213	Ntrk3
ENSMUSG00000039304	52.7625	-3.95355	0.661717	-5.97469	2.30525e-09	1.03311e-07	ENSMUSG00000039304	22035	Tnfsf10
ENSMUSG00000016496	50.825	-4.10032	0.687559	-5.96358	2.46766e-09	1.10018e-07	ENSMUSG00000016496	60533	Cd274
ENSMUSG00000029379	32.9649	-6.50412	1.09194	-5.9565	2.57693e-09	1.14006e-07	ENSMUSG00000029379	330122	Cxcl3
ENSMUSG00000024349	498.813	-1.63746	0.275322	-5.94742	2.72402e-09	1.19899e-07	ENSMUSG00000024349	72512	Sting1
ENSMUSG00000027419	708.333	-1.51766	0.255271	-5.9453	2.75944e-09	1.21148e-07	ENSMUSG00000027419	18549	Pcsk2
ENSMUSG00000025491	698.182	-1.38776	0.233514	-5.94293	2.79964e-09	1.22602e-07	ENSMUSG00000025491	68713	Ifitm1
ENSMUSG00000085786	76.2382	-3.91462	0.659102	-5.93932	2.86202e-09	1.25016e-07	ENSMUSG00000085786	NA	Gm15987
ENSMUSG00000022157	63.3029	-5.06596	0.853721	-5.93398	2.95675e-09	1.28828e-07	ENSMUSG00000022157	17231	Mcpt8
ENSMUSG00000030790	3442.79	-0.914866	0.154369	-5.92649	3.09475e-09	1.34501e-07	ENSMUSG00000030790	11535	Adm
ENSMUSG00000024079	1316.77	-1.42968	0.241548	-5.9188	3.243e-09	1.4059e-07	ENSMUSG00000024079	19106	Eif2ak2
ENSMUSG00000018171	3774.11	-0.72447	0.12247	-5.91551	3.30855e-09	1.43072e-07	ENSMUSG00000018171	75909	Vmp1
ENSMUSG00000034855	466.217	-8.1579	1.38685	-5.88234	4.04512e-09	1.72759e-07	ENSMUSG00000034855	15945	Cxcl10
ENSMUSG00000020733	931.239	-0.92708	0.157669	-5.87991	4.10483e-09	1.74876e-07	ENSMUSG00000020733	26941	Slc9a3r1
ENSMUSG00000044337	2170.13	-1.10989	0.189077	-5.87005	4.35659e-09	1.85144e-07	ENSMUSG00000044337	12778	Ackr3
ENSMUSG00000072620	1069.76	-4.01129	0.683651	-5.86745	4.42541e-09	1.87607e-07	ENSMUSG00000072620	20556	Slfn2
ENSMUSG00000037849	32.9958	-6.91337	1.17921	-5.86274	4.55299e-09	1.92542e-07	ENSMUSG00000037849	102639543	Ifi206
ENSMUSG00000074115	35.613	-6.12838	1.04634	-5.85697	4.71383e-09	1.98857e-07	ENSMUSG00000074115	20208	Saa1
ENSMUSG00000097558	58.7699	-4.16323	0.71194	-5.84773	4.98337e-09	2.09204e-07	ENSMUSG00000097558	NA	Gm26902
ENSMUSG00000079491	49.1436	-4.92641	0.845174	-5.82887	5.58038e-09	2.3257e-07	ENSMUSG00000079491	NA	H2-T10
ENSMUSG00000035352	98.1789	-3.67284	0.63079	-5.82261	5.79356e-09	2.39717e-07	ENSMUSG00000035352	20293	Ccl12
ENSMUSG00000028885	679.02	-1.46401	0.251846	-5.81311	6.13233e-09	2.51922e-07	ENSMUSG00000028885	100340	Smpdl3b
ENSMUSG00000029810	8182.09	-1.17043	0.201636	-5.80468	6.44899e-09	2.64301e-07	ENSMUSG00000029810	65963	Tmem176b
ENSMUSG00000032786	1153.61	-0.807845	0.13929	-5.79975	6.64139e-09	2.709e-07	ENSMUSG00000032786	11655	Alas1
ENSMUSG00000024743	53.5209	-2.75461	0.475941	-5.78771	7.13533e-09	2.88998e-07	ENSMUSG00000024743	54525	Syt7
ENSMUSG00000038507	1176.44	-1.66444	0.288168	-5.77593	7.65283e-09	3.09232e-07	ENSMUSG00000038507	243771	Parp12
ENSMUSG00000039195	2210.13	-1.18482	0.205234	-5.77305	7.78501e-09	3.13838e-07	ENSMUSG00000039195	73737	1110008P14Rik
ENSMUSG00000020572	1206.21	-0.925805	0.160564	-5.76597	8.11899e-09	3.26539e-07	ENSMUSG00000020572	59027	Nampt
ENSMUSG00000052270	76.2272	-4.71	0.817588	-5.76084	8.36937e-09	3.34271e-07	ENSMUSG00000052270	14289	Fpr2
ENSMUSG00000037997	753.757	-1.38785	0.241212	-5.75366	8.73315e-09	3.47995e-07	ENSMUSG00000037997	101187	Parp11
ENSMUSG00000032661	142.875	-6.61462	1.15018	-5.75096	8.87399e-09	3.51981e-07	ENSMUSG00000032661	246727	Oas3
ENSMUSG00000029005	222.384	-2.70878	0.471522	-5.74475	9.20565e-09	3.64299e-07	ENSMUSG00000029005	70433	Draxin
ENSMUSG00000029231	3207.94	-1.17085	0.203961	-5.74058	9.43536e-09	3.72535e-07	ENSMUSG00000029231	18595	Pdgfra
ENSMUSG00000028864	167.792	-2.08599	0.363417	-5.73993	9.47141e-09	3.73104e-07	ENSMUSG00000028864	15234	Hgf
ENSMUSG00000049723	123.204	-2.67393	0.466607	-5.73058	1.00085e-08	3.93365e-07	ENSMUSG00000049723	17381	Mmp12
ENSMUSG00000063354	70.6357	-4.60487	0.806535	-5.70945	1.1334e-08	4.43441e-07	ENSMUSG00000063354	72027	Slc39a4
ENSMUSG00000052353	2817.08	-1.04505	0.183158	-5.70574	1.15841e-08	4.52198e-07	ENSMUSG00000052353	80982	Cemip
ENSMUSG00000001750	675.874	-1.1551	0.20262	-5.70083	1.19226e-08	4.6436e-07	ENSMUSG00000001750	27060	Tcirg1
ENSMUSG00000019850	101.477	-2.15362	0.37802	-5.69711	1.21855e-08	4.72467e-07	ENSMUSG00000019850	21929	Tnfaip3
ENSMUSG00000021109	3704.72	-1.13264	0.199047	-5.69032	1.268e-08	4.90541e-07	ENSMUSG00000021109	15251	Hif1a
ENSMUSG00000043336	1059.88	-0.926794	0.163046	-5.68424	1.31395e-08	5.07177e-07	ENSMUSG00000043336	78749	Filip1l
ENSMUSG00000033066	367.468	-1.51318	0.266572	-5.67644	1.3753e-08	5.28494e-07	ENSMUSG00000033066	14457	Gas7
ENSMUSG00000049037	588.983	-2.06017	0.364016	-5.65956	1.5176e-08	5.8059e-07	ENSMUSG00000049037	269799	Clec4a1
ENSMUSG00000006418	1152.19	-1.09671	0.193982	-5.65368	1.57047e-08	5.99489e-07	ENSMUSG00000006418	81018	Rnf114
ENSMUSG00000022094	1095.86	-1.57918	0.279613	-5.64774	1.62571e-08	6.19207e-07	ENSMUSG00000022094	213053	Slc39a14
ENSMUSG00000022875	158.641	-7.00562	1.24305	-5.63583	1.74216e-08	6.60642e-07	ENSMUSG00000022875	16644	Kng1
ENSMUSG00000029298	81.8253	-4.62221	0.822764	-5.6179	1.93288e-08	7.26579e-07	ENSMUSG00000029298	236573	Gbp9
ENSMUSG00000053475	287.088	-1.76179	0.313786	-5.61463	1.96979e-08	7.37241e-07	ENSMUSG00000053475	21930	Tnfaip6
ENSMUSG00000022037	13613.2	-0.888902	0.15849	-5.60858	2.03999e-08	7.60215e-07	ENSMUSG00000022037	12759	Clu
ENSMUSG00000030157	95.2455	-2.2504	0.401342	-5.60719	2.05637e-08	7.64668e-07	ENSMUSG00000030157	93694	Clec2d
ENSMUSG00000045092	1482.93	-1.17969	0.211176	-5.58629	2.31969e-08	8.58884e-07	ENSMUSG00000045092	13609	S1pr1
ENSMUSG00000000120	156.322	-1.49974	0.268512	-5.58537	2.33197e-08	8.61581e-07	ENSMUSG00000000120	18053	Ngfr
ENSMUSG00000028793	804.852	-0.934477	0.16762	-5.57498	2.47562e-08	9.127e-07	ENSMUSG00000028793	75234	Rnf19b
ENSMUSG00000012350	82.9156	-2.87832	0.51725	-5.56466	2.62667e-08	9.63424e-07	ENSMUSG00000012350	13661	Ehf
ENSMUSG00000061535	130.419	-2.85642	0.513602	-5.56155	2.67389e-08	9.77443e-07	ENSMUSG00000061535	109323	C1qtnf7
ENSMUSG00000062609	698.88	-3.84268	0.694566	-5.53249	3.15723e-08	1.14203e-06	ENSMUSG00000062609	16516	Kcnj15
ENSMUSG00000057666	1669.57	-1.35062	0.245144	-5.50951	3.59829e-08	1.28807e-06	ENSMUSG00000057666	14433	Gapdh
ENSMUSG00000026241	29.8302	-5.87693	1.06796	-5.50294	3.73509e-08	1.33427e-06	ENSMUSG00000026241	18159	Nppc
ENSMUSG00000052776	321.127	-6.22181	1.13166	-5.49792	3.84288e-08	1.3615e-06	ENSMUSG00000052776	246730	Oas1a
ENSMUSG00000075707	528.699	-1.34493	0.245318	-5.4824	4.19591e-08	1.48353e-06	ENSMUSG00000075707	107585	Dio3
ENSMUSG00000025161	814.96	-1.91246	0.348962	-5.48042	4.2431e-08	1.49409e-06	ENSMUSG00000025161	80879	Slc16a3
ENSMUSG00000101581	83.7267	-2.73904	0.501148	-5.46553	4.61518e-08	1.60545e-06	ENSMUSG00000101581	319707	C430002N11Rik
ENSMUSG00000068115	471.847	-1.25827	0.230509	-5.45864	4.79794e-08	1.66232e-06	ENSMUSG00000068115	78177	Ninl
ENSMUSG00000046079	237.65	-1.67423	0.306755	-5.45785	4.81934e-08	1.66639e-06	ENSMUSG00000046079	231549	Lrrc8d
ENSMUSG00000070031	293.826	-2.00192	0.367158	-5.45249	4.96693e-08	1.71399e-06	ENSMUSG00000070031	434484	Sp140
ENSMUSG00000006611	896.142	-1.0219	0.18762	-5.44665	5.13278e-08	1.76769e-06	ENSMUSG00000006611	15216	Hfe
ENSMUSG00000066861	105.192	-8.79424	1.61481	-5.44598	5.15203e-08	1.77078e-06	ENSMUSG00000066861	23960	Oas1g
ENSMUSG00000033538	314.54	-4.85755	0.892927	-5.44003	5.3271e-08	1.82731e-06	ENSMUSG00000033538	12363	Casp4
ENSMUSG00000058427	579.894	-6.05216	1.11302	-5.43762	5.39959e-08	1.8485e-06	ENSMUSG00000058427	20310	Cxcl2
ENSMUSG00000029322	754.367	-8.46498	1.55781	-5.43391	5.51332e-08	1.8837e-06	ENSMUSG00000029322	231507	Plac8
ENSMUSG00000026749	2008.47	-1.28968	0.237935	-5.42033	5.94889e-08	2.0245e-06	ENSMUSG00000026749	59126	Nek6
ENSMUSG00000082419	32.0825	-4.51746	0.83404	-5.41636	6.08237e-08	2.06585e-06	ENSMUSG00000082419	NA	Gm11425
ENSMUSG00000027540	4504.92	-0.709531	0.131176	-5.409	6.33772e-08	2.14414e-06	ENSMUSG00000027540	19246	Ptpn1
ENSMUSG00000022216	3048.55	-0.874787	0.161985	-5.40041	6.64881e-08	2.23623e-06	ENSMUSG00000022216	19186	Psme1
ENSMUSG00000067212	28.929	-4.32912	0.80236	-5.39549	6.83384e-08	2.28954e-06	ENSMUSG00000067212	15040	H2-T23
ENSMUSG00000027555	646.049	-1.16463	0.215917	-5.3939	6.89443e-08	2.30536e-06	ENSMUSG00000027555	71934	Car13
ENSMUSG00000027082	1442.02	-0.889662	0.165053	-5.39017	7.03924e-08	2.34018e-06	ENSMUSG00000027082	21788	Tfpi
ENSMUSG00000048218	95.7301	-1.87806	0.348933	-5.38229	7.35443e-08	2.44026e-06	ENSMUSG00000048218	105827	Amigo2
ENSMUSG00000024659	6594.24	-0.803384	0.149288	-5.38143	7.38943e-08	2.44716e-06	ENSMUSG00000024659	16952	Anxa1
ENSMUSG00000004936	1171.12	-0.821985	0.152844	-5.37793	7.53481e-08	2.49053e-06	ENSMUSG00000004936	26395	Map2k1
ENSMUSG00000066677	26.9183	-6.58756	1.22952	-5.35784	8.42235e-08	2.77857e-06	ENSMUSG00000066677	100033459	Ifi208
ENSMUSG00000039519	358.593	-1.83383	0.342629	-5.35222	8.68813e-08	2.86078e-06	ENSMUSG00000039519	13123	Cyp7b1
ENSMUSG00000029552	1026.59	-1.09028	0.203772	-5.35048	8.77236e-08	2.88301e-06	ENSMUSG00000029552	21753	Tes
ENSMUSG00000003617	5766.25	-2.35434	0.44032	-5.34689	8.94791e-08	2.92955e-06	ENSMUSG00000003617	12870	Cp
ENSMUSG00000061878	959.824	-1.05134	0.196908	-5.33925	9.33295e-08	3.04406e-06	ENSMUSG00000061878	20698	Sphk1
ENSMUSG00000049866	891.899	-0.795229	0.149284	-5.32696	9.98686e-08	3.23897e-06	ENSMUSG00000049866	320982	Arl4c
ENSMUSG00000026470	1180.5	-0.827871	0.155521	-5.32322	1.01949e-07	3.30023e-06	ENSMUSG00000026470	58244	Stx6
ENSMUSG00000043263	21.6763	-5.89304	1.10714	-5.32276	1.02203e-07	3.30228e-06	ENSMUSG00000043263	236312	Ifi209
ENSMUSG00000057531	1323.52	-0.800095	0.150596	-5.31284	1.07929e-07	3.47427e-06	ENSMUSG00000057531	94245	Dtnbp1
ENSMUSG00000028525	1440.6	-1.34138	0.252636	-5.30955	1.09896e-07	3.53099e-06	ENSMUSG00000028525	18578	Pde4b
ENSMUSG00000000530	521.331	-1.06123	0.200125	-5.30285	1.14009e-07	3.65635e-06	ENSMUSG00000000530	11482	Acvrl1
ENSMUSG00000025780	905.463	-1.701	0.321058	-5.29811	1.17005e-07	3.74548e-06	ENSMUSG00000025780	209378	Itih5
ENSMUSG00000035517	588.006	-1.36529	0.258358	-5.28449	1.26052e-07	4.00535e-06	ENSMUSG00000035517	100121	Tdrd7
ENSMUSG00000029304	29862.5	-2.79783	0.529872	-5.28021	1.29035e-07	4.09259e-06	ENSMUSG00000029304	20750	Spp1
ENSMUSG00000002983	893.722	-1.05684	0.200292	-5.27648	1.31687e-07	4.16903e-06	ENSMUSG00000002983	19698	Relb
ENSMUSG00000026104	3108.51	-2.72358	0.516948	-5.26857	1.37491e-07	4.33686e-06	ENSMUSG00000026104	20846	Stat1
ENSMUSG00000007805	260.641	-1.45642	0.27695	-5.25878	1.45013e-07	4.5492e-06	ENSMUSG00000007805	13345	Twist2
ENSMUSG00000091649	205.747	-5.8019	1.10594	-5.24612	1.55337e-07	4.82916e-06	ENSMUSG00000091649	236451	Phf11b
ENSMUSG00000037447	235.951	-1.45905	0.278356	-5.24166	1.59135e-07	4.93833e-06	ENSMUSG00000037447	214855	Arid5a
ENSMUSG00000062760	136.512	-3.27957	0.625961	-5.23926	1.61225e-07	4.9942e-06	ENSMUSG00000062760	72301	Shisal1
ENSMUSG00000039450	1902.24	-0.938238	0.180155	-5.20795	1.90942e-07	5.88306e-06	ENSMUSG00000039450	67880	Dcxr
ENSMUSG00000040918	284.494	-1.38486	0.26601	-5.20605	1.92906e-07	5.92529e-06	ENSMUSG00000040918	116914	Slc19a2
ENSMUSG00000025790	1907.18	-0.852456	0.163885	-5.20154	1.97641e-07	6.05069e-06	ENSMUSG00000025790	108116	Slco3a1
ENSMUSG00000006369	795.148	-1.88881	0.363819	-5.19162	2.0847e-07	6.35502e-06	ENSMUSG00000006369	14114	Fbln1
ENSMUSG00000029664	33.9487	-5.12292	0.987117	-5.18978	2.10542e-07	6.40687e-06	ENSMUSG00000029664	21789	Tfpi2
ENSMUSG00000029762	909.286	-0.820357	0.158981	-5.16011	2.46809e-07	7.44483e-06	ENSMUSG00000029762	14187	Akr1b8
ENSMUSG00000062991	378.052	-1.11243	0.216512	-5.13797	2.77726e-07	8.26187e-06	ENSMUSG00000062991	211323	Nrg1
ENSMUSG00000051726	44.6865	-5.7605	1.12166	-5.13571	2.81084e-07	8.34736e-06	ENSMUSG00000051726	382571	Kcnf1
ENSMUSG00000031880	225.98	-1.32982	0.25916	-5.13129	2.87767e-07	8.53115e-06	ENSMUSG00000031880	56437	Rrad
ENSMUSG00000046318	80.2942	-3.79754	0.740861	-5.12585	2.96198e-07	8.76603e-06	ENSMUSG00000046318	320924	Ccbe1
ENSMUSG00000036986	919.65	-0.935497	0.182815	-5.11717	3.10154e-07	9.14768e-06	ENSMUSG00000036986	18854	Pml
ENSMUSG00000021477	12465.2	-0.822953	0.160943	-5.11332	3.16549e-07	9.32038e-06	ENSMUSG00000021477	13039	Ctsl
ENSMUSG00000026817	3991.43	-0.626248	0.123515	-5.0702	3.97394e-07	1.16214e-05	ENSMUSG00000026817	11636	Ak1
ENSMUSG00000038213	678.778	-1.02861	0.203029	-5.06632	4.05579e-07	1.18407e-05	ENSMUSG00000038213	213233	Tapbpl
ENSMUSG00000033107	323.427	-1.57261	0.311029	-5.05616	4.27782e-07	1.24678e-05	ENSMUSG00000033107	67664	Rnf125
ENSMUSG00000030681	1295.37	-0.778015	0.154106	-5.04857	4.4513e-07	1.29298e-05	ENSMUSG00000030681	78388	Mvp
ENSMUSG00000017737	372.952	-1.86711	0.370764	-5.03583	4.75781e-07	1.37401e-05	ENSMUSG00000017737	17395	Mmp9
ENSMUSG00000056025	73.0343	-3.66071	0.727003	-5.03534	4.77008e-07	1.37401e-05	ENSMUSG00000056025	12722	Clca3a1
ENSMUSG00000028527	307.833	-1.49936	0.297751	-5.03562	4.76307e-07	1.37401e-05	ENSMUSG00000028527	11639	Ak4
ENSMUSG00000037254	209.489	-1.71466	0.340916	-5.02958	4.91547e-07	1.41353e-05	ENSMUSG00000037254	16425	Itih2
ENSMUSG00000016918	6036.65	-0.691005	0.138132	-5.00248	5.65978e-07	1.61678e-05	ENSMUSG00000016918	240725	Sulf1
ENSMUSG00000026204	531.499	-1.10281	0.220789	-4.99486	5.88778e-07	1.67914e-05	ENSMUSG00000026204	19275	Ptprn
ENSMUSG00000024781	4898.08	-0.71825	0.14381	-4.99445	5.9003e-07	1.67993e-05	ENSMUSG00000024781	16889	Lipa
ENSMUSG00000000628	1062.53	-1.02628	0.205677	-4.98979	6.04452e-07	1.71252e-05	ENSMUSG00000000628	15277	Hk2
ENSMUSG00000024810	151.349	-3.10881	0.623021	-4.9899	6.04107e-07	1.71252e-05	ENSMUSG00000024810	77125	Il33
ENSMUSG00000106339	95.7152	-2.44039	0.48929	-4.98761	6.11305e-07	1.72709e-05	ENSMUSG00000106339	NA	Gm43489
ENSMUSG00000027797	10763.6	-0.675018	0.135417	-4.98471	6.20534e-07	1.74946e-05	ENSMUSG00000027797	13175	Dclk1
ENSMUSG00000064246	682.785	-1.92066	0.385911	-4.97695	6.45946e-07	1.81222e-05	ENSMUSG00000064246	12654	Chil1
ENSMUSG00000032369	88.5992	-2.21425	0.445924	-4.96552	6.85179e-07	1.91296e-05	ENSMUSG00000032369	22038	Plscr1
ENSMUSG00000034997	94.0411	-2.1088	0.426616	-4.94308	7.68998e-07	2.14005e-05	ENSMUSG00000034997	15558	Htr2a
ENSMUSG00000030905	69.9398	-2.37268	0.48259	-4.91656	8.80797e-07	2.43546e-05	ENSMUSG00000030905	12971	Crym
ENSMUSG00000043587	964.793	-0.741737	0.153464	-4.83331	1.34284e-06	3.65447e-05	ENSMUSG00000043587	235534	Pxylp1
ENSMUSG00000028989	565.096	-1.92369	0.398175	-4.83126	1.35671e-06	3.68641e-05	ENSMUSG00000028989	654812	Angptl7
ENSMUSG00000079197	1889.35	-0.971701	0.201993	-4.81056	1.5051e-06	4.07676e-05	ENSMUSG00000079197	19188	Psme2
ENSMUSG00000020464	298.346	-1.27329	0.264721	-4.80993	1.50984e-06	4.0832e-05	ENSMUSG00000020464	71701	Pnpt1
ENSMUSG00000056220	635.11	-1.00325	0.208972	-4.80089	1.57963e-06	4.26525e-05	ENSMUSG00000056220	18783	Pla2g4a
ENSMUSG00000085949	14.123	-6.80039	1.41667	-4.80025	1.58467e-06	4.27217e-05	ENSMUSG00000085949	NA	Gm14275
ENSMUSG00000028367	11638.2	-0.628697	0.131006	-4.799	1.59463e-06	4.28562e-05	ENSMUSG00000028367	22166	Txn1
ENSMUSG00000000838	1740.16	-0.618932	0.129262	-4.78822	1.68271e-06	4.50832e-05	ENSMUSG00000000838	14265	Fmr1
ENSMUSG00000048834	66.0255	-2.43379	0.509066	-4.7809	1.74513e-06	4.65386e-05	ENSMUSG00000048834	211739	Vstm2a
ENSMUSG00000029287	1043.99	-1.50319	0.314517	-4.77935	1.75865e-06	4.68269e-05	ENSMUSG00000029287	21814	Tgfbr3
ENSMUSG00000060183	21.837	-6.71476	1.40524	-4.77837	1.76722e-06	4.69824e-05	ENSMUSG00000060183	NA	Cxcl11
ENSMUSG00000041827	185.946	-6.18603	1.29596	-4.77332	1.81218e-06	4.80856e-05	ENSMUSG00000041827	231655	Oasl1
ENSMUSG00000028517	9588.62	-0.777004	0.163053	-4.76535	1.88521e-06	4.98888e-05	ENSMUSG00000028517	67916	Plpp3
ENSMUSG00000028128	236.466	-1.21283	0.254563	-4.76437	1.89444e-06	5.00562e-05	ENSMUSG00000028128	14066	F3
ENSMUSG00000032372	555.929	-1.52736	0.321187	-4.75537	1.98086e-06	5.21002e-05	ENSMUSG00000032372	18828	Plscr2
ENSMUSG00000021567	1055.07	-1.25016	0.26322	-4.74948	2.03937e-06	5.35575e-05	ENSMUSG00000021567	72293	Nkd2
ENSMUSG00000002227	752.197	-1.61979	0.34136	-4.74511	2.08395e-06	5.43972e-05	ENSMUSG00000002227	17454	Mov10
ENSMUSG00000034394	75.5752	-3.38177	0.713296	-4.74105	2.12615e-06	5.52919e-05	ENSMUSG00000034394	16878	Lif
ENSMUSG00000020400	2740.26	-0.873199	0.184218	-4.74005	2.1367e-06	5.54386e-05	ENSMUSG00000020400	57783	Tnip1
ENSMUSG00000075602	11154.5	-3.34716	0.706499	-4.73768	2.16183e-06	5.59224e-05	ENSMUSG00000075602	110454	Ly6a
ENSMUSG00000033581	1174.62	-0.782526	0.165231	-4.73595	2.18032e-06	5.63039e-05	ENSMUSG00000033581	319765	Igf2bp2
ENSMUSG00000023915	750.702	-1.31502	0.278933	-4.71446	2.42352e-06	6.18572e-05	ENSMUSG00000023915	94185	Tnfrsf21
ENSMUSG00000025791	1639.03	-0.603987	0.128125	-4.71406	2.42827e-06	6.18869e-05	ENSMUSG00000025791	72157	Pgm1
ENSMUSG00000021069	204.658	-1.31213	0.278387	-4.71333	2.43703e-06	6.20184e-05	ENSMUSG00000021069	110095	Pygl
ENSMUSG00000031963	826.117	-1.43341	0.304799	-4.70279	2.56634e-06	6.50216e-05	ENSMUSG00000031963	73230	Bmper
ENSMUSG00000021725	309.03	-1.33425	0.284449	-4.69065	2.72331e-06	6.8696e-05	ENSMUSG00000021725	52552	Parp8
ENSMUSG00000038301	530.023	-0.920259	0.196695	-4.67861	2.88828e-06	7.25392e-05	ENSMUSG00000038301	71982	Snx10
ENSMUSG00000055994	24.1031	-5.10748	1.09624	-4.65909	3.17607e-06	7.89625e-05	ENSMUSG00000055994	257632	Nod2
ENSMUSG00000023330	381.611	-0.859817	0.184759	-4.65372	3.26006e-06	8.08176e-05	ENSMUSG00000023330	69185	Dtwd1
ENSMUSG00000005686	275.829	-1.60069	0.344837	-4.64187	3.4527e-06	8.53478e-05	ENSMUSG00000005686	11717	Ampd3
ENSMUSG00000060981	171.517	-1.94196	0.418706	-4.63802	3.51761e-06	8.6704e-05	ENSMUSG00000060981	69386	H4c8
ENSMUSG00000014599	7113.81	-0.606772	0.131119	-4.62764	3.69854e-06	9.07747e-05	ENSMUSG00000014599	12977	Csf1
ENSMUSG00000026773	2480.85	-0.88969	0.192488	-4.62205	3.79975e-06	9.28625e-05	ENSMUSG00000026773	170768	Pfkfb3
ENSMUSG00000028755	317.398	-1.1391	0.246565	-4.61988	3.83964e-06	9.34403e-05	ENSMUSG00000028755	72269	Cda
ENSMUSG00000092130	216.816	-1.55659	0.336927	-4.61995	3.83832e-06	9.34403e-05	ENSMUSG00000092130	100303738	D030025P21Rik
ENSMUSG00000017715	877.452	-0.923289	0.199899	-4.61879	3.85985e-06	9.37997e-05	ENSMUSG00000017715	74451	Pgs1
ENSMUSG00000017002	4154.94	-2.35231	0.509519	-4.61673	3.89838e-06	9.46029e-05	ENSMUSG00000017002	20568	Slpi
ENSMUSG00000007891	25563.4	-0.53729	0.116715	-4.60345	4.15543e-06	0.000100699	ENSMUSG00000007891	13033	Ctsd
ENSMUSG00000034205	5487.67	-0.775974	0.168838	-4.59596	4.30771e-06	0.000104243	ENSMUSG00000034205	94352	Loxl2
ENSMUSG00000020388	2334.9	-0.723707	0.157813	-4.58585	4.52141e-06	0.000109108	ENSMUSG00000020388	30794	Pdlim4
ENSMUSG00000047878	243.071	-1.4102	0.308402	-4.57261	4.81688e-06	0.000115914	ENSMUSG00000047878	239559	A4galt
ENSMUSG00000036781	7889.32	-0.744255	0.162844	-4.57036	4.86878e-06	0.000117	ENSMUSG00000036781	67941	Rps27l
ENSMUSG00000028583	9966.25	-0.713593	0.156196	-4.56857	4.91064e-06	0.000117515	ENSMUSG00000028583	14726	Pdpn
ENSMUSG00000047557	2263.2	-0.593161	0.129878	-4.56708	4.94572e-06	0.00011819	ENSMUSG00000047557	17035	Lxn
ENSMUSG00000004655	10178.7	-0.587115	0.128613	-4.56498	4.99534e-06	0.000119046	ENSMUSG00000004655	11826	Aqp1
ENSMUSG00000051029	22.3618	-5.10527	1.12037	-4.55677	5.19469e-06	0.000123456	ENSMUSG00000051029	282663	Serpinb1b
ENSMUSG00000020458	13642.3	-0.45599	0.100922	-4.51823	6.23582e-06	0.000146985	ENSMUSG00000020458	68585	Rtn4
ENSMUSG00000021728	3485.3	-0.927462	0.205668	-4.50952	6.49736e-06	0.000152317	ENSMUSG00000021728	13723	Emb
ENSMUSG00000063229	12485.5	-0.787368	0.174647	-4.50834	6.53375e-06	0.000152755	ENSMUSG00000063229	16828	Ldha
ENSMUSG00000033720	404.686	-0.982406	0.218045	-4.50552	6.62097e-06	0.000154585	ENSMUSG00000033720	94282	Sfxn5
ENSMUSG00000039942	250.79	-1.15708	0.257058	-4.50123	6.75607e-06	0.000157313	ENSMUSG00000039942	19219	Ptger4
ENSMUSG00000027397	1730.83	-0.683897	0.152168	-4.49436	6.97785e-06	0.000162258	ENSMUSG00000027397	20515	Slc20a1
ENSMUSG00000020277	1993.79	-0.969678	0.215908	-4.49116	7.08353e-06	0.000164053	ENSMUSG00000020277	18641	Pfkl
ENSMUSG00000024235	122.332	-1.67544	0.373753	-4.48275	7.36868e-06	0.0001702	ENSMUSG00000024235	26410	Map3k8
ENSMUSG00000021127	6106.06	-0.56326	0.125712	-4.48057	7.44444e-06	0.000171491	ENSMUSG00000021127	12192	Zfp36l1
ENSMUSG00000031639	510.854	-1.21061	0.270733	-4.47161	7.76327e-06	0.000178597	ENSMUSG00000031639	142980	Tlr3
ENSMUSG00000043953	16.581	-5.56106	1.24475	-4.46761	7.90996e-06	0.000181636	ENSMUSG00000043953	54199	Ccrl2
ENSMUSG00000033717	335.745	-1.56027	0.349417	-4.46535	7.99385e-06	0.000182925	ENSMUSG00000033717	11551	Adra2a
ENSMUSG00000064105	408.195	-0.940108	0.210671	-4.46244	8.10327e-06	0.000184939	ENSMUSG00000064105	94219	Cnnm2
ENSMUSG00000042348	473.393	-0.787786	0.176757	-4.45689	8.31575e-06	0.000189288	ENSMUSG00000042348	218639	Arl15
ENSMUSG00000002881	2217.92	-0.649981	0.145876	-4.45571	8.36151e-06	0.000190078	ENSMUSG00000002881	17936	Nab1
ENSMUSG00000028995	2077.8	-0.591081	0.132884	-4.4481	8.66329e-06	0.000195906	ENSMUSG00000028995	84652	Fam126a
ENSMUSG00000022144	116.616	-1.86969	0.420532	-4.44602	8.74769e-06	0.000197298	ENSMUSG00000022144	14573	Gdnf
ENSMUSG00000055172	3503.36	-0.851198	0.191485	-4.44525	8.77892e-06	0.000197743	ENSMUSG00000055172	50909	C1ra
ENSMUSG00000068696	657.159	-1.19399	0.268799	-4.44194	8.91532e-06	0.000200353	ENSMUSG00000068696	64378	Gpr88
ENSMUSG00000020707	569.889	-0.791531	0.178198	-4.44187	8.91799e-06	0.000200353	ENSMUSG00000020707	71956	Rnf135
ENSMUSG00000049719	20.577	-5.2889	1.19121	-4.43996	8.99768e-06	0.00020188	ENSMUSG00000049719	74306	Prss46
ENSMUSG00000051748	27.2402	-5.55383	1.2514	-4.43808	9.07643e-06	0.000203119	ENSMUSG00000051748	66107	Wfdc21
ENSMUSG00000049985	27.4333	-4.97066	1.12055	-4.4359	9.16895e-06	0.000204659	ENSMUSG00000049985	77318	Ankrd55
ENSMUSG00000026202	483.22	-0.894303	0.201741	-4.43294	9.29589e-06	0.000206956	ENSMUSG00000026202	22145	Tuba4a
ENSMUSG00000073491	16.4362	-6.64695	1.49966	-4.43232	9.32235e-06	0.000207278	ENSMUSG00000073491	623121	Ifi213
ENSMUSG00000020798	36.6865	-3.22435	0.729415	-4.42046	9.84905e-06	0.000218426	ENSMUSG00000020798	77577	Spns3
ENSMUSG00000039899	114.718	-2.08628	0.472445	-4.41592	1.0058e-05	0.000222774	ENSMUSG00000039899	14190	Fgl2
ENSMUSG00000084289	43.5651	-2.20205	0.49944	-4.40904	1.03832e-05	0.000228801	ENSMUSG00000084289	NA	Fth1-ps
ENSMUSG00000024339	1151.34	-1.21313	0.275493	-4.40347	1.06534e-05	0.000234457	ENSMUSG00000024339	21355	Tap2
ENSMUSG00000021583	626.308	-1.10093	0.250927	-4.38746	1.1468e-05	0.000251741	ENSMUSG00000021583	80898	Erap1
ENSMUSG00000060780	41.6889	-3.55204	0.810473	-4.38267	1.17231e-05	0.000256364	ENSMUSG00000060780	74342	Lrrtm1
ENSMUSG00000074604	95.5854	-1.94755	0.444687	-4.3796	1.18896e-05	0.000259675	ENSMUSG00000074604	211666	Mgst2
ENSMUSG00000050737	692.864	-1.08163	0.247005	-4.37898	1.19237e-05	0.00026009	ENSMUSG00000050737	64292	Ptges
ENSMUSG00000039501	1390.23	-0.898175	0.205129	-4.37859	1.19448e-05	0.000260222	ENSMUSG00000039501	98999	Znfx1
ENSMUSG00000015652	420.701	-1.43758	0.328771	-4.37259	1.22782e-05	0.000266476	ENSMUSG00000015652	70358	Steap1
ENSMUSG00000037613	570.013	-0.974821	0.222998	-4.37143	1.23433e-05	0.000266881	ENSMUSG00000037613	79201	Tnfrsf23
ENSMUSG00000021469	560.27	-1.35351	0.309686	-4.3706	1.23905e-05	0.000267566	ENSMUSG00000021469	17702	Msx2
ENSMUSG00000026558	1528.77	-1.01476	0.23239	-4.36663	1.26176e-05	0.000271337	ENSMUSG00000026558	80914	Uck2
ENSMUSG00000026166	21.3403	-5.61326	1.28563	-4.36616	1.26453e-05	0.00027137	ENSMUSG00000026166	20297	Ccl20
ENSMUSG00000045838	458.626	-0.916834	0.210157	-4.36261	1.28522e-05	0.00027545	ENSMUSG00000045838	214239	Ccdc9b
ENSMUSG00000028108	4367.61	-0.788143	0.180723	-4.36105	1.29441e-05	0.000276751	ENSMUSG00000028108	13601	Ecm1
ENSMUSG00000020227	608.486	-1.07335	0.246147	-4.36059	1.2971e-05	0.000276982	ENSMUSG00000020227	73914	Irak3
ENSMUSG00000029759	1322.94	-0.954437	0.219591	-4.34643	1.38372e-05	0.000294386	ENSMUSG00000029759	269823	Pon3
ENSMUSG00000030351	522.886	-3.449	0.79514	-4.3376	1.44046e-05	0.00030608	ENSMUSG00000030351	68498	Tspan11
ENSMUSG00000005087	7258.07	-0.507251	0.117	-4.33548	1.45444e-05	0.000308671	ENSMUSG00000005087	12505	Cd44
ENSMUSG00000066682	29.016	-4.33228	0.999371	-4.33501	1.45752e-05	0.000308943	ENSMUSG00000066682	545812	Pilrb2
ENSMUSG00000090222	10.5209	-6.61469	1.52953	-4.32467	1.5276e-05	0.000321822	ENSMUSG00000090222	NA	Ifi203-ps
ENSMUSG00000025068	1681.46	-0.656103	0.151747	-4.32368	1.5345e-05	0.000322882	ENSMUSG00000025068	14873	Gsto1
ENSMUSG00000029126	883.143	-0.896338	0.207403	-4.32171	1.54826e-05	0.000324983	ENSMUSG00000029126	18196	Nsg1
ENSMUSG00000016833	1099.61	-0.712927	0.165646	-4.30391	1.67806e-05	0.000349677	ENSMUSG00000016833	68735	Mrps18c
ENSMUSG00000054404	624.743	-3.06644	0.714112	-4.29406	1.75434e-05	0.000364479	ENSMUSG00000054404	327978	Slfn5
ENSMUSG00000019970	1443.32	-0.783588	0.182909	-4.28403	1.8354e-05	0.000379712	ENSMUSG00000019970	20393	Sgk1
ENSMUSG00000021290	5755	-0.62079	0.145098	-4.27842	1.88222e-05	0.000387539	ENSMUSG00000021290	70257	Atp5mpl
ENSMUSG00000028036	556.422	-1.1032	0.2584	-4.26934	1.96056e-05	0.000402708	ENSMUSG00000028036	19220	Ptgfr
ENSMUSG00000038644	605.754	-0.860041	0.201913	-4.25947	2.04913e-05	0.000419901	ENSMUSG00000038644	18971	Pold1
ENSMUSG00000019173	5611.05	-0.608721	0.143179	-4.25148	2.12366e-05	0.000434657	ENSMUSG00000019173	19345	Rab5c
ENSMUSG00000037679	1401.54	-0.796568	0.187697	-4.24391	2.19661e-05	0.000448524	ENSMUSG00000037679	70435	Inf2
ENSMUSG00000003992	538.62	-0.926731	0.218493	-4.24147	2.22061e-05	0.000452355	ENSMUSG00000003992	66970	Ssbp2
ENSMUSG00000027656	6526.71	-0.828792	0.195856	-4.23165	2.31984e-05	0.000470899	ENSMUSG00000027656	22403	Ccn5
ENSMUSG00000028539	90.1822	-2.95202	0.697981	-4.22938	2.34338e-05	0.000475119	ENSMUSG00000028539	11876	Artn
ENSMUSG00000001542	1634.34	-0.667449	0.15786	-4.22812	2.35653e-05	0.000476997	ENSMUSG00000001542	192657	Ell2
ENSMUSG00000023951	1411.21	-1.00814	0.238445	-4.22796	2.35817e-05	0.000476997	ENSMUSG00000023951	22339	Vegfa
ENSMUSG00000053318	15.7483	-5.98081	1.41484	-4.22719	2.36631e-05	0.000478084	ENSMUSG00000053318	74748	Slamf8
ENSMUSG00000028015	414.78	-0.873965	0.206877	-4.22456	2.39412e-05	0.000482009	ENSMUSG00000028015	229445	Ctso
ENSMUSG00000021508	1348.79	-1.27314	0.301785	-4.2187	2.45709e-05	0.000493536	ENSMUSG00000021508	57266	Cxcl14
ENSMUSG00000097789	1455.37	-1.237	0.293306	-4.21744	2.47086e-05	0.000495724	ENSMUSG00000097789	100039239	Gm2115
ENSMUSG00000024424	293.39	-0.897278	0.212933	-4.21389	2.51011e-05	0.00050243	ENSMUSG00000024424	72747	Ttc39c
ENSMUSG00000037411	9925.73	-0.672521	0.159742	-4.21004	2.55327e-05	0.000510476	ENSMUSG00000037411	18787	Serpine1
ENSMUSG00000023349	483.651	-1.73747	0.412941	-4.20756	2.58142e-05	0.000514911	ENSMUSG00000023349	56620	Clec4n
ENSMUSG00000045551	135.057	-6.42434	1.52838	-4.20336	2.62987e-05	0.000523365	ENSMUSG00000045551	14293	Fpr1
ENSMUSG00000001663	857.012	-0.836899	0.199149	-4.20238	2.64125e-05	0.000525024	ENSMUSG00000001663	14871	Gstt1
ENSMUSG00000021939	15325.9	-0.557627	0.132958	-4.19402	2.74057e-05	0.000542892	ENSMUSG00000021939	13030	Ctsb
ENSMUSG00000031278	1155.82	-0.793848	0.189508	-4.18898	2.80207e-05	0.000554436	ENSMUSG00000031278	50790	Acsl4
ENSMUSG00000019987	21.2347	-5.54172	1.32554	-4.18072	2.90584e-05	0.000571692	ENSMUSG00000019987	11846	Arg1
ENSMUSG00000027859	131.43	-1.46414	0.350429	-4.17813	2.93916e-05	0.000576932	ENSMUSG00000027859	18049	Ngf
ENSMUSG00000052837	2332.52	-0.872152	0.208878	-4.17542	2.97435e-05	0.000582431	ENSMUSG00000052837	16477	Junb
ENSMUSG00000032540	490.622	-1.05434	0.252524	-4.1752	2.9773e-05	0.000582431	ENSMUSG00000032540	67469	Abhd5
ENSMUSG00000024143	3929.23	-0.468114	0.11213	-4.17474	2.98332e-05	0.000582946	ENSMUSG00000024143	104215	Rhoq
ENSMUSG00000038402	27.1102	-6.17005	1.48012	-4.16862	3.06447e-05	0.000598127	ENSMUSG00000038402	14238	Foxf2
ENSMUSG00000090125	41.3535	-3.04467	0.731066	-4.1647	3.11767e-05	0.000605118	ENSMUSG00000090125	18991	Pou3f1
ENSMUSG00000053897	125.625	-1.95191	0.468993	-4.16191	3.15593e-05	0.00060977	ENSMUSG00000053897	67547	Slc39a8
ENSMUSG00000031497	20.014	-5.26488	1.26621	-4.158	3.21051e-05	0.000618928	ENSMUSG00000031497	24099	Tnfsf13b
ENSMUSG00000096446	14.0086	-5.2223	1.26099	-4.14145	3.45124e-05	0.000663115	ENSMUSG00000096446	101056159	Gm8104
ENSMUSG00000030281	845.513	-0.646496	0.156211	-4.1386	3.49428e-05	0.000670638	ENSMUSG00000030281	171095	Il17rc
ENSMUSG00000038503	3450.34	-0.459109	0.111064	-4.13373	3.56921e-05	0.000683499	ENSMUSG00000038503	67943	Mesd
ENSMUSG00000067297	45.2289	-3.85532	0.934127	-4.12719	3.67223e-05	0.000701668	ENSMUSG00000067297	112419	Ifit1bl2
ENSMUSG00000020357	64.9373	-2.60951	0.632448	-4.12604	3.69056e-05	0.000704391	ENSMUSG00000020357	14257	Flt4
ENSMUSG00000025496	70.7368	-2.48723	0.603114	-4.12398	3.72381e-05	0.000709169	ENSMUSG00000025496	13491	Drd4
ENSMUSG00000039361	9319.62	-0.647687	0.157305	-4.1174	3.83164e-05	0.000728097	ENSMUSG00000039361	233489	Picalm
ENSMUSG00000073418	1921.82	-2.27095	0.551772	-4.11574	3.85942e-05	0.000732568	ENSMUSG00000073418	12268	C4b
ENSMUSG00000033386	703.662	-0.813112	0.197927	-4.10814	3.98858e-05	0.000754593	ENSMUSG00000033386	20321	Frrs1
ENSMUSG00000117538	14.3938	-5.91947	1.44175	-4.10576	4.02992e-05	0.000759915	ENSMUSG00000117538	NA	Gm50008
ENSMUSG00000078784	1192.95	-0.712483	0.173645	-4.1031	4.07657e-05	0.000767873	ENSMUSG00000078784	69126	Rbis
ENSMUSG00000026888	1086.02	-1.06919	0.260623	-4.10243	4.08834e-05	0.000768412	ENSMUSG00000026888	50915	Grb14
ENSMUSG00000038521	2090.55	-0.929363	0.226848	-4.09685	4.18815e-05	0.000785461	ENSMUSG00000038521	50908	C1s1
ENSMUSG00000051439	365.727	-1.59371	0.39023	-4.08403	4.42621e-05	0.000829206	ENSMUSG00000051439	12475	Cd14
ENSMUSG00000024404	1945.04	-0.531652	0.130319	-4.07962	4.51088e-05	0.000842325	ENSMUSG00000024404	66878	Riok3
ENSMUSG00000018442	1944	-0.479742	0.117685	-4.0765	4.57187e-05	0.000851868	ENSMUSG00000018442	116891	Derl2
ENSMUSG00000041645	8090.47	-0.604934	0.148395	-4.07651	4.57168e-05	0.000851868	ENSMUSG00000041645	27225	Ddx24
ENSMUSG00000021453	3536.65	-0.677808	0.166328	-4.07514	4.59863e-05	0.000855931	ENSMUSG00000021453	23882	Gadd45g
ENSMUSG00000062345	43.7739	-3.94413	0.971885	-4.05823	4.94454e-05	0.000912439	ENSMUSG00000062345	18788	Serpinb2
ENSMUSG00000060441	128.341	-1.31073	0.323357	-4.05349	5.04581e-05	0.000929139	ENSMUSG00000060441	667823	Trim5
ENSMUSG00000036136	23.2446	-4.12345	1.01788	-4.051	5.09984e-05	0.00093709	ENSMUSG00000036136	104943	Fam110c
ENSMUSG00000024472	859.038	-0.606122	0.149617	-4.05116	5.09647e-05	0.00093709	ENSMUSG00000024472	70640	Dcp2
ENSMUSG00000029426	4061.02	-0.55354	0.136656	-4.0506	5.10868e-05	0.000937714	ENSMUSG00000029426	12492	Scarb2
ENSMUSG00000021890	273.782	-0.896176	0.221553	-4.04496	5.23315e-05	0.000959541	ENSMUSG00000021890	74427	Eaf1
ENSMUSG00000003721	1088.9	-0.57263	0.141656	-4.04239	5.29099e-05	0.000968088	ENSMUSG00000003721	72999	Insig2
ENSMUSG00000023249	3752.91	-0.566339	0.140175	-4.04024	5.33971e-05	0.000975968	ENSMUSG00000023249	235587	Parp3
ENSMUSG00000022965	1227.42	-0.710525	0.176048	-4.03597	5.43784e-05	0.000992852	ENSMUSG00000022965	15980	Ifngr2
ENSMUSG00000004371	124.976	-1.25022	0.310086	-4.03184	5.5343e-05	0.00100816	ENSMUSG00000004371	16156	Il11
ENSMUSG00000060675	2993.52	-0.526594	0.130608	-4.03188	5.5333e-05	0.00100816	ENSMUSG00000060675	225845	Plaat3
ENSMUSG00000027533	1183.93	-0.982779	0.244522	-4.01919	5.83989e-05	0.00105842	ENSMUSG00000027533	16592	Fabp5
ENSMUSG00000020865	76.5106	-1.70578	0.424771	-4.01577	5.92528e-05	0.00107164	ENSMUSG00000020865	76408	Abcc3
ENSMUSG00000000532	285.34	-1.12898	0.281382	-4.01225	6.01422e-05	0.00108545	ENSMUSG00000000532	11479	Acvr1b
ENSMUSG00000028494	2142.46	-0.643216	0.160436	-4.00919	6.09287e-05	0.0010985	ENSMUSG00000028494	11520	Plin2
ENSMUSG00000042349	309.56	-1.18406	0.295374	-4.00867	6.1062e-05	0.00109975	ENSMUSG00000042349	56489	Ikbke
ENSMUSG00000016256	3539.63	-0.68379	0.170651	-4.00694	6.15106e-05	0.00110499	ENSMUSG00000016256	64138	Ctsz
ENSMUSG00000036427	2617.13	-0.771998	0.192671	-4.00681	6.15447e-05	0.00110499	ENSMUSG00000036427	14751	Gpi1
ENSMUSG00000043067	3536.99	-0.57955	0.144804	-4.00231	6.27263e-05	0.00112386	ENSMUSG00000043067	244745	Dpy19l1
ENSMUSG00000024479	242.247	-1.35651	0.339253	-3.99851	6.37424e-05	0.0011397	ENSMUSG00000024479	105853	Mal2
ENSMUSG00000022221	777.549	-0.74743	0.186983	-3.99731	6.40661e-05	0.00114312	ENSMUSG00000022221	56532	Ripk3
ENSMUSG00000002020	8584.87	-1.11646	0.279299	-3.99736	6.40525e-05	0.00114312	ENSMUSG00000002020	16997	Ltbp2
ENSMUSG00000038991	3334.7	-0.61117	0.153024	-3.99395	6.49814e-05	0.00115706	ENSMUSG00000038991	105245	Txndc5
ENSMUSG00000008318	97.8362	-1.54594	0.387358	-3.99099	6.57969e-05	0.00117037	ENSMUSG00000008318	320100	Relt
ENSMUSG00000052125	64.4387	-2.72885	0.684143	-3.98871	6.64338e-05	0.00118048	ENSMUSG00000052125	320046	F730043M19Rik
ENSMUSG00000030761	266.502	-1.20916	0.303313	-3.9865	6.70546e-05	0.00118784	ENSMUSG00000030761	17921	Myo7a
ENSMUSG00000033854	35.7234	-3.55625	0.892782	-3.98333	6.7956e-05	0.00120258	ENSMUSG00000033854	72258	Kcnk10
ENSMUSG00000028645	1218.77	-0.764492	0.192116	-3.97933	6.91106e-05	0.00122051	ENSMUSG00000028645	20525	Slc2a1
ENSMUSG00000003458	691.296	-0.699402	0.175919	-3.97571	7.01701e-05	0.00123416	ENSMUSG00000003458	59287	Ncstn
ENSMUSG00000047344	38.9787	-2.97502	0.749154	-3.97117	7.15218e-05	0.0012541	ENSMUSG00000047344	236285	Lancl3
ENSMUSG00000016349	33.0677	-3.66368	0.926349	-3.95497	7.65444e-05	0.00133269	ENSMUSG00000016349	13628	Eef1a2
ENSMUSG00000027074	1486.36	-0.656026	0.166036	-3.95111	7.77901e-05	0.00135301	ENSMUSG00000027074	58207	Slc43a3
ENSMUSG00000031803	135.289	-1.23279	0.312164	-3.94918	7.84207e-05	0.00136261	ENSMUSG00000031803	72297	B3gnt3
ENSMUSG00000024539	929.987	-0.647903	0.164128	-3.94755	7.89556e-05	0.00137052	ENSMUSG00000024539	19255	Ptpn2
ENSMUSG00000004864	151.205	-1.64608	0.417195	-3.94559	7.96032e-05	0.00137899	ENSMUSG00000004864	26415	Mapk13
ENSMUSG00000031903	1307.48	-0.530979	0.134593	-3.94508	7.97738e-05	0.00138056	ENSMUSG00000031903	192654	Pla2g15
ENSMUSG00000025372	1493.14	-0.645668	0.163687	-3.94452	7.99589e-05	0.00138238	ENSMUSG00000025372	108100	Baiap2
ENSMUSG00000031591	1812.49	-0.696192	0.176638	-3.94135	8.10233e-05	0.00139938	ENSMUSG00000031591	11886	Asah1
ENSMUSG00000024887	928.264	-0.65011	0.16512	-3.93719	8.24417e-05	0.00142245	ENSMUSG00000024887	54447	Asah2
ENSMUSG00000038037	502.152	-0.876916	0.223021	-3.93199	8.42474e-05	0.0014507	ENSMUSG00000038037	12703	Socs1
ENSMUSG00000058163	17.8878	-3.84444	0.978012	-3.93087	8.46398e-05	0.00145601	ENSMUSG00000058163	432555	Gm5431
ENSMUSG00000039316	610.157	-0.796194	0.202833	-3.92536	8.66015e-05	0.00148827	ENSMUSG00000039316	76438	Rftn1
ENSMUSG00000030327	591.01	-0.66821	0.170315	-3.92339	8.73129e-05	0.001499	ENSMUSG00000030327	67602	Necap1
ENSMUSG00000022359	301.404	-0.997045	0.254167	-3.9228	8.75251e-05	0.00150115	ENSMUSG00000022359	76773	Wdyhv1
ENSMUSG00000060550	106.63	-8.27849	2.11282	-3.91822	8.92049e-05	0.00152693	ENSMUSG00000060550	15018	H2-Q7
ENSMUSG00000042671	44.2213	-2.97255	0.759204	-3.91534	9.02753e-05	0.00154219	ENSMUSG00000042671	67792	Rgs8
ENSMUSG00000027820	12048.3	-0.74543	0.19077	-3.90747	9.32673e-05	0.00158545	ENSMUSG00000027820	17380	Mme
ENSMUSG00000020123	117.496	-2.23868	0.572899	-3.90764	9.32024e-05	0.00158545	ENSMUSG00000020123	54140	Avpr1a
ENSMUSG00000042265	36.8107	-3.29444	0.843232	-3.90692	9.34812e-05	0.00158752	ENSMUSG00000042265	58217	Trem1
ENSMUSG00000006586	3387.66	-0.545929	0.139883	-3.90276	9.51013e-05	0.00161345	ENSMUSG00000006586	12395	Runx1t1
ENSMUSG00000032846	2782.5	-0.53735	0.137827	-3.89873	9.6699e-05	0.00163734	ENSMUSG00000032846	67263	Zswim6
ENSMUSG00000073565	320.49	-0.765358	0.196449	-3.89597	9.78069e-05	0.00165285	ENSMUSG00000073565	71373	Prr16
ENSMUSG00000078771	205.783	-1.36378	0.350473	-3.89125	9.9729e-05	0.00168039	ENSMUSG00000078771	14017	Evi2a
ENSMUSG00000025575	1621.76	-0.487945	0.125423	-3.89038	0.000100086	0.00168168	ENSMUSG00000025575	76025	Cant1
ENSMUSG00000075302	12.9104	-5.75788	1.4816	-3.88627	0.000101797	0.00170194	ENSMUSG00000075302	66748	Erich2
ENSMUSG00000015839	3810.77	-0.502181	0.129214	-3.88644	0.000101723	0.00170194	ENSMUSG00000015839	18024	Nfe2l2
ENSMUSG00000038067	17.9928	-4.07832	1.05	-3.8841	0.000102711	0.00171557	ENSMUSG00000038067	12985	Csf3
ENSMUSG00000022014	260.526	-1.88282	0.484838	-3.8834	0.000103006	0.00171883	ENSMUSG00000022014	108670	Epsti1
ENSMUSG00000105033	24.499	-4.9407	1.27379	-3.87874	0.000104999	0.00175039	ENSMUSG00000105033	NA	Gm43423
ENSMUSG00000081534	6200.65	-0.486067	0.125335	-3.87815	0.000105256	0.00175297	ENSMUSG00000081534	67739	Slc48a1
ENSMUSG00000000204	10.8803	-5.62753	1.45124	-3.87775	0.000105426	0.00175412	ENSMUSG00000000204	20558	Slfn4
ENSMUSG00000022906	1506.09	-2.0028	0.519823	-3.85285	0.00011675	0.00191666	ENSMUSG00000022906	80285	Parp9
ENSMUSG00000028413	4089.9	-0.444756	0.115451	-3.85234	0.000116993	0.00191881	ENSMUSG00000028413	14595	B4galt1
ENSMUSG00000058420	92.0184	-1.50738	0.39137	-3.85156	0.000117366	0.00192093	ENSMUSG00000058420	110058	Syt17
ENSMUSG00000002847	39.599	-2.32508	0.604016	-3.84937	0.000118423	0.00193491	ENSMUSG00000002847	85031	Pla1a
ENSMUSG00000049758	37.7075	-2.2688	0.590332	-3.84327	0.000121408	0.00197808	ENSMUSG00000049758	258022	Olfr1318
ENSMUSG00000027220	328.569	-1.22503	0.319218	-3.8376	0.000124242	0.00202232	ENSMUSG00000027220	80976	Syt13
ENSMUSG00000047731	2061.02	-0.615064	0.160733	-3.82663	0.000129911	0.00210666	ENSMUSG00000047731	226178	Wbp1l
ENSMUSG00000106427	27.9429	-3.37638	0.884235	-3.81842	0.000134309	0.00217185	ENSMUSG00000106427	NA	Gm42820
ENSMUSG00000021215	353.737	-0.893307	0.233997	-3.8176	0.000134757	0.00217502	ENSMUSG00000021215	56349	Net1
ENSMUSG00000047261	533.665	-0.820403	0.215175	-3.81273	0.000137442	0.00221215	ENSMUSG00000047261	14432	Gap43
ENSMUSG00000027613	1916.56	-0.473398	0.124198	-3.81165	0.00013804	0.00221558	ENSMUSG00000027613	16418	Eif6
ENSMUSG00000022548	5663.19	-2.76961	0.726611	-3.81168	0.000138027	0.00221558	ENSMUSG00000022548	11815	Apod
ENSMUSG00000026620	448.849	-0.993115	0.260615	-3.81066	0.000138595	0.00222242	ENSMUSG00000026620	226778	Mark1
ENSMUSG00000026087	1993.96	-0.64738	0.170356	-3.80016	0.000144601	0.00230587	ENSMUSG00000026087	107734	Mrpl30
ENSMUSG00000020676	100.522	-8.18479	2.15464	-3.79868	0.000145467	0.00231753	ENSMUSG00000020676	20292	Ccl11
ENSMUSG00000069892	198.278	-1.25139	0.329807	-3.79431	0.000148054	0.00235658	ENSMUSG00000069892	245240	9930111J21Rik2
ENSMUSG00000040952	20214.1	-0.50044	0.132183	-3.78597	0.000153108	0.00242805	ENSMUSG00000040952	20085	Rps19
ENSMUSG00000025746	213.577	-8.98222	2.37428	-3.78314	0.000154864	0.00244692	ENSMUSG00000025746	16193	Il6
ENSMUSG00000043017	30.39	-3.08099	0.814772	-3.78141	0.00015594	0.00245715	ENSMUSG00000043017	19222	Ptgir
ENSMUSG00000097754	47.0126	-3.24231	0.857517	-3.78105	0.00015617	0.00245854	ENSMUSG00000097754	102639566	Ptgs2os2
ENSMUSG00000090124	10.6357	-5.78271	1.53243	-3.77356	0.000160937	0.00252437	ENSMUSG00000090124	394432	Ugt1a7c
ENSMUSG00000053338	10.7391	-5.93164	1.57278	-3.77144	0.000162311	0.0025413	ENSMUSG00000053338	245126	Tarm1
ENSMUSG00000029409	59.2838	-3.00978	0.798454	-3.7695	0.000163574	0.00255412	ENSMUSG00000029409	57425	U90926
ENSMUSG00000042901	2082.13	-0.53476	0.142058	-3.76437	0.000166971	0.00260246	ENSMUSG00000042901	108909	Aida
ENSMUSG00000036249	586.494	-0.794218	0.211113	-3.76205	0.000168528	0.00262435	ENSMUSG00000036249	71684	Rbm43
ENSMUSG00000026123	904.159	-0.597142	0.158771	-3.76103	0.000169217	0.00263033	ENSMUSG00000026123	226971	Plekhb2
ENSMUSG00000078486	29.1029	-3.43064	0.912323	-3.76033	0.00016969	0.00263531	ENSMUSG00000078486	74183	Perm1
ENSMUSG00000026547	10007.1	-0.565179	0.150537	-3.75442	0.000173742	0.00268683	ENSMUSG00000026547	21346	Tagln2
ENSMUSG00000023456	3428.81	-0.709588	0.189024	-3.75397	0.000174059	0.00268863	ENSMUSG00000023456	21991	Tpi1
ENSMUSG00000023307	2458.58	-0.582909	0.155721	-3.74329	0.000181627	0.00277844	ENSMUSG00000023307	69104	Marchf5
ENSMUSG00000020701	15.7401	-5.43343	1.45368	-3.73771	0.000185701	0.00283046	ENSMUSG00000020701	270893	Tmem132e
ENSMUSG00000019832	1023.4	-0.71419	0.191172	-3.73585	0.000187079	0.00284895	ENSMUSG00000019832	67844	Rab32
ENSMUSG00000021996	6945.03	-0.508393	0.136119	-3.73491	0.000187783	0.00285485	ENSMUSG00000021996	13885	Esd
ENSMUSG00000031155	46.9566	-1.74654	0.467666	-3.73458	0.000188027	0.00285582	ENSMUSG00000031155	18715	Pim2
ENSMUSG00000055447	6649.26	-0.481458	0.128961	-3.73337	0.000188934	0.00286707	ENSMUSG00000055447	16423	Cd47
ENSMUSG00000021756	7909.53	-0.788148	0.211387	-3.72846	0.000192654	0.00291839	ENSMUSG00000021756	16195	Il6st
ENSMUSG00000031652	1717.42	-0.591335	0.158677	-3.72666	0.000194031	0.00292897	ENSMUSG00000031652	80750	N4bp1
ENSMUSG00000020936	6994.51	-0.492711	0.132205	-3.72687	0.000193876	0.00292897	ENSMUSG00000020936	18107	Nmt1
ENSMUSG00000019772	60.3102	-3.29265	0.883661	-3.72614	0.000194434	0.00293249	ENSMUSG00000019772	22353	Vip
ENSMUSG00000041552	99.0456	-2.08202	0.558932	-3.72501	0.00019531	0.00294055	ENSMUSG00000041552	211612	Ptchd1
ENSMUSG00000042622	357.844	-0.84261	0.226466	-3.72069	0.000198676	0.00298342	ENSMUSG00000042622	17133	Maff
ENSMUSG00000031453	1900.83	-0.683107	0.183608	-3.72047	0.000198852	0.00298346	ENSMUSG00000031453	19414	Rasa3
ENSMUSG00000049580	239.554	-0.967732	0.26044	-3.71576	0.000202595	0.00303436	ENSMUSG00000049580	244152	Tsku
ENSMUSG00000097990	8.8057	-5.53262	1.48922	-3.71511	0.000203111	0.00303681	ENSMUSG00000097990	100503104	Gm19557
ENSMUSG00000028378	808.649	-0.701304	0.188934	-3.7119	0.000205711	0.00307036	ENSMUSG00000028378	67103	Ptgr1
ENSMUSG00000038884	371.312	-1.0411	0.280608	-3.71015	0.000207139	0.00308901	ENSMUSG00000038884	319278	Shfl
ENSMUSG00000021559	1527.41	-0.514585	0.138728	-3.70931	0.000207825	0.00309656	ENSMUSG00000021559	69635	Dapk1
ENSMUSG00000073980	15.2317	-5.72892	1.54758	-3.70185	0.000214035	0.00317811	ENSMUSG00000073980	NA	Gm9574
ENSMUSG00000026600	3019.62	-0.483416	0.130728	-3.69786	0.000217423	0.0032201	ENSMUSG00000026600	20652	Soat1
ENSMUSG00000029816	2784.38	-0.630912	0.170713	-3.69575	0.00021924	0.00324423	ENSMUSG00000029816	93695	Gpnmb
ENSMUSG00000037010	432.928	-1.0936	0.296067	-3.69376	0.000220964	0.00326414	ENSMUSG00000037010	30878	Apln
ENSMUSG00000031875	2163.73	-0.463524	0.125613	-3.6901	0.000224163	0.00330227	ENSMUSG00000031875	68119	Cmtm3
ENSMUSG00000005413	2636.03	-0.781162	0.212089	-3.68318	0.000230346	0.00337958	ENSMUSG00000005413	15368	Hmox1
ENSMUSG00000017400	154.623	-1.6918	0.459951	-3.67823	0.00023486	0.00343704	ENSMUSG00000017400	217154	Stac2
ENSMUSG00000051391	6449.21	-0.416733	0.113345	-3.67668	0.000236285	0.00345205	ENSMUSG00000051391	22628	Ywhag
ENSMUSG00000003161	4073.4	-0.439631	0.11958	-3.67645	0.000236499	0.00345224	ENSMUSG00000003161	109552	Sri
ENSMUSG00000057143	1694.76	-1.97526	0.537552	-3.67455	0.000238265	0.00347215	ENSMUSG00000057143	319236	Trim12c
ENSMUSG00000024981	1231	-0.655878	0.178735	-3.66955	0.000242974	0.0035348	ENSMUSG00000024981	433256	Acsl5
ENSMUSG00000025934	28.731	-4.08483	1.11413	-3.66639	0.000245998	0.00356977	ENSMUSG00000025934	14859	Gsta3
ENSMUSG00000023087	190.185	-1.36159	0.371474	-3.66536	0.000246992	0.00357705	ENSMUSG00000023087	12457	Noct
ENSMUSG00000019359	10.8992	-5.72169	1.56138	-3.66451	0.000247808	0.00358398	ENSMUSG00000019359	71584	Gdpd2
ENSMUSG00000085894	21.6469	-3.09818	0.84584	-3.66285	0.000249429	0.00359897	ENSMUSG00000085894	NA	Gm15832
ENSMUSG00000030946	145.114	-1.0069	0.274981	-3.66171	0.000250533	0.00360826	ENSMUSG00000030946	76429	Lhpp
ENSMUSG00000117764	11.1886	-6.17107	1.68521	-3.66191	0.000250345	0.00360826	ENSMUSG00000117764	NA	Gm50143
ENSMUSG00000038578	21.7499	-4.01122	1.09569	-3.6609	0.000251329	0.00361671	ENSMUSG00000038578	634731	Susd1
ENSMUSG00000057841	9612.16	-0.5752	0.157132	-3.66063	0.000251601	0.00361761	ENSMUSG00000057841	19951	Rpl32
ENSMUSG00000024789	848.456	-0.888083	0.24325	-3.6509	0.000261321	0.00373248	ENSMUSG00000024789	16452	Jak2
ENSMUSG00000026875	149.562	-1.1881	0.325689	-3.64795	0.000264344	0.00376942	ENSMUSG00000026875	22029	Traf1
ENSMUSG00000035754	926.704	-0.592727	0.162814	-3.64051	0.000272101	0.00387682	ENSMUSG00000035754	216156	Wdr18
ENSMUSG00000027195	2117.29	-0.486341	0.13364	-3.6392	0.000273489	0.00388978	ENSMUSG00000027195	56348	Hsd17b12
ENSMUSG00000023885	14051.9	-0.81714	0.224563	-3.6388	0.000273913	0.00388978	ENSMUSG00000023885	21826	Thbs2
ENSMUSG00000032261	233.595	-0.924931	0.254323	-3.63683	0.000276011	0.00391314	ENSMUSG00000032261	212531	Sh3bgrl2
ENSMUSG00000004221	842.803	-0.544175	0.149659	-3.63611	0.000276791	0.00391777	ENSMUSG00000004221	16151	Ikbkg
ENSMUSG00000112234	23.3311	-4.50008	1.23806	-3.63479	0.00027821	0.0039314	ENSMUSG00000112234	NA	Gm48427
ENSMUSG00000071644	10289.3	-0.473237	0.130214	-3.63429	0.000278743	0.0039357	ENSMUSG00000071644	67160	Eef1g
ENSMUSG00000068417	43.369	-1.85438	0.511236	-3.62725	0.00028645	0.00403133	ENSMUSG00000068417	667034	Pnp2
ENSMUSG00000019966	385.436	-0.826729	0.228138	-3.62382	0.00029029	0.00407208	ENSMUSG00000019966	17311	Kitl
ENSMUSG00000030714	356.146	-0.771659	0.213019	-3.62249	0.00029178	0.00408966	ENSMUSG00000030714	75565	Sgf29
ENSMUSG00000027994	449.608	-0.721141	0.199359	-3.6173	0.000297696	0.00416582	ENSMUSG00000027994	66815	Mcub
ENSMUSG00000051457	136.622	-1.70436	0.471608	-3.61394	0.000301581	0.00421334	ENSMUSG00000051457	20737	Spn
ENSMUSG00000026494	522.681	-1.3583	0.376791	-3.60491	0.000312256	0.00435895	ENSMUSG00000026494	269152	Kif26b
ENSMUSG00000031548	7255.34	-0.969561	0.269235	-3.60117	0.000316792	0.00441513	ENSMUSG00000031548	20377	Sfrp1
ENSMUSG00000109324	7695.13	-0.514771	0.143045	-3.59867	0.00031985	0.00445415	ENSMUSG00000109324	15469	Prmt1
ENSMUSG00000003429	6424.29	-0.685173	0.190459	-3.59748	0.000321316	0.00447096	ENSMUSG00000003429	27207	Rps11
ENSMUSG00000021185	484.776	-0.612695	0.170494	-3.59364	0.000326092	0.0045301	ENSMUSG00000021185	217830	Dglucy
ENSMUSG00000030088	227.466	-1.0698	0.297743	-3.59302	0.00032687	0.00453725	ENSMUSG00000030088	107747	Aldh1l1
ENSMUSG00000022336	9663.02	-0.474907	0.132357	-3.58807	0.000333139	0.00462057	ENSMUSG00000022336	16341	Eif3e
ENSMUSG00000035547	158.138	-1.30546	0.363926	-3.58716	0.000334304	0.00463028	ENSMUSG00000035547	12337	Capn5
ENSMUSG00000032501	1122.4	-0.513731	0.143216	-3.5871	0.000334376	0.00463028	ENSMUSG00000032501	211770	Trib1
ENSMUSG00000020326	5655.43	-0.791822	0.220825	-3.58575	0.00033611	0.00465055	ENSMUSG00000020326	12450	Ccng1
ENSMUSG00000050953	2930.14	-0.85588	0.239047	-3.58039	0.000343089	0.00473194	ENSMUSG00000050953	14609	Gja1
ENSMUSG00000020386	1393.42	-0.578936	0.161908	-3.5757	0.000349286	0.00480589	ENSMUSG00000020386	66397	Sar1b
ENSMUSG00000045932	225.647	-1.03823	0.290354	-3.57574	0.000349239	0.00480589	ENSMUSG00000045932	15958	Ifit2
ENSMUSG00000020108	2569.96	-0.807861	0.226018	-3.57432	0.00035114	0.00482755	ENSMUSG00000020108	74747	Ddit4
ENSMUSG00000073702	25107	-0.522594	0.146246	-3.57338	0.000352402	0.00484104	ENSMUSG00000073702	114641	Rpl31
ENSMUSG00000048521	16.0476	-4.32487	1.21115	-3.57086	0.000355804	0.00488001	ENSMUSG00000048521	80901	Cxcr6
ENSMUSG00000025747	820.786	-0.681112	0.190839	-3.56905	0.000358285	0.00491013	ENSMUSG00000025747	22171	Tyms
ENSMUSG00000008398	1754.79	-0.461611	0.129351	-3.56866	0.00035881	0.00491342	ENSMUSG00000008398	13713	Elk3
ENSMUSG00000018500	58.1228	-1.70534	0.478199	-3.56616	0.000362243	0.00495649	ENSMUSG00000018500	11541	Adora2b
ENSMUSG00000050587	61.6567	-2.22672	0.624478	-3.56573	0.000362849	0.00496086	ENSMUSG00000050587	241568	Lrrc4c
ENSMUSG00000040990	2238.23	-0.486608	0.136525	-3.56424	0.000364916	0.00498517	ENSMUSG00000040990	58194	Sh3kbp1
ENSMUSG00000055760	194.001	-1.0579	0.296908	-3.56307	0.000366545	0.00500346	ENSMUSG00000055760	67242	Gemin6
ENSMUSG00000000982	148.429	-1.39162	0.390784	-3.56109	0.000369322	0.0050334	ENSMUSG00000000982	20302	Ccl3
ENSMUSG00000090963	25.201	-3.50205	0.984333	-3.55779	0.000373991	0.00508499	ENSMUSG00000090963	NA	Gm17655
ENSMUSG00000028480	3818.92	-0.6563	0.184506	-3.55706	0.000375027	0.00509505	ENSMUSG00000028480	384009	Glipr2
ENSMUSG00000008193	8.79028	-5.49057	1.54544	-3.55276	0.000381213	0.00516284	ENSMUSG00000008193	272382	Spib
ENSMUSG00000020844	2730.25	-0.724683	0.204345	-3.54636	0.000390587	0.00528564	ENSMUSG00000020844	18230	Nxn
ENSMUSG00000067203	33.9925	-2.62127	0.740543	-3.53965	0.000400653	0.00539475	ENSMUSG00000067203	NA	H2-K2
ENSMUSG00000033487	1971.17	-0.646487	0.18279	-3.53677	0.00040505	0.0054387	ENSMUSG00000033487	319448	Fndc3a
ENSMUSG00000025027	1465.74	-0.526866	0.148986	-3.53634	0.000405709	0.00544331	ENSMUSG00000025027	170750	Xpnpep1
ENSMUSG00000039699	11.3455	-5.67268	1.60903	-3.52552	0.000422646	0.00563549	ENSMUSG00000039699	74481	Batf2
ENSMUSG00000027406	1555.49	-0.560522	0.159099	-3.52311	0.000426519	0.00568275	ENSMUSG00000027406	170718	Idh3b
ENSMUSG00000050010	35.3231	-3.43531	0.975874	-3.52024	0.000431163	0.00573576	ENSMUSG00000050010	330096	Shisa3
ENSMUSG00000004698	183.999	-1.2247	0.348311	-3.51611	0.000437918	0.00581339	ENSMUSG00000004698	79221	Hdac9
ENSMUSG00000019577	167.952	-1.07771	0.306768	-3.5131	0.000442904	0.00586932	ENSMUSG00000019577	27273	Pdk4
ENSMUSG00000097039	288.004	-0.873162	0.248561	-3.51286	0.000443304	0.00587012	ENSMUSG00000097039	NA	Pvt1
ENSMUSG00000046027	630.87	-0.7105	0.20239	-3.51055	0.000447183	0.00590789	ENSMUSG00000046027	170460	Stard5
ENSMUSG00000028076	143.911	-1.40234	0.399737	-3.50815	0.000451233	0.00594844	ENSMUSG00000028076	12479	Cd1d1
ENSMUSG00000039911	899.176	-0.845781	0.241495	-3.50227	0.000461319	0.00606676	ENSMUSG00000039911	74646	Spsb1
ENSMUSG00000063632	326.253	-1.68524	0.48144	-3.50042	0.000464527	0.0061043	ENSMUSG00000063632	20666	Sox11
ENSMUSG00000069601	5287.29	-0.441122	0.126049	-3.4996	0.00046595	0.00611718	ENSMUSG00000069601	11735	Ank3
ENSMUSG00000068335	1322.38	-0.603226	0.172474	-3.4975	0.000469649	0.00615753	ENSMUSG00000068335	13448	Dok1
ENSMUSG00000025408	418.129	-0.720414	0.206273	-3.49252	0.000478482	0.00626382	ENSMUSG00000025408	13198	Ddit3
ENSMUSG00000018428	454.09	-0.771027	0.220907	-3.49028	0.000482512	0.00631181	ENSMUSG00000018428	11640	Akap1
ENSMUSG00000025231	816.027	-0.578519	0.165776	-3.48977	0.000483444	0.00631442	ENSMUSG00000025231	24069	Sufu
ENSMUSG00000094622	11.7177	-5.67761	1.62981	-3.4836	0.000494722	0.00644221	ENSMUSG00000094622	100040944	Gm3055
ENSMUSG00000090733	23320.5	-0.505344	0.145185	-3.48069	0.000500126	0.00650277	ENSMUSG00000090733	57294	Rps27
ENSMUSG00000021209	310.585	-1.1861	0.340892	-3.4794	0.000502536	0.00652428	ENSMUSG00000021209	74521	Ppp4r4
ENSMUSG00000063060	14.3578	-4.30269	1.23672	-3.47912	0.000503061	0.00652618	ENSMUSG00000063060	20680	Sox7
ENSMUSG00000106651	7.46657	-5.94588	1.70989	-3.47734	0.000506407	0.00656465	ENSMUSG00000106651	NA	Gm42608
ENSMUSG00000024805	181.939	-1.14405	0.329223	-3.47499	0.000510876	0.00661761	ENSMUSG00000024805	76073	Pcgf5
ENSMUSG00000091549	156.619	-1.24941	0.359626	-3.47419	0.000512395	0.00662734	ENSMUSG00000091549	NA	Gm6548
ENSMUSG00000117007	8.54249	-5.32577	1.53579	-3.46778	0.000524774	0.00676715	ENSMUSG00000117007	NA	Gm41556
ENSMUSG00000015653	1030.96	-0.758574	0.21885	-3.46618	0.000527912	0.00680253	ENSMUSG00000015653	74051	Steap2
ENSMUSG00000030695	12632.1	-0.489854	0.141595	-3.45956	0.000541065	0.00695643	ENSMUSG00000030695	11674	Aldoa
ENSMUSG00000033576	172.052	-1.24166	0.35899	-3.45877	0.000542653	0.00696647	ENSMUSG00000033576	71939	Apol6
ENSMUSG00000049287	289.422	-0.907421	0.262889	-3.45173	0.00055701	0.00712956	ENSMUSG00000049287	216792	Iba57
ENSMUSG00000113902	4314.05	-0.537092	0.155713	-3.44925	0.000562143	0.0071846	ENSMUSG00000113902	102631912	Ndufb1
ENSMUSG00000024044	1279.35	-0.802114	0.232716	-3.44675	0.000567373	0.00723257	ENSMUSG00000024044	13823	Epb41l3
ENSMUSG00000038179	63.7205	-2.7753	0.805095	-3.44717	0.000566487	0.00723257	ENSMUSG00000038179	75345	Slamf7
ENSMUSG00000018459	284.007	-4.10113	1.18989	-3.44665	0.000567573	0.00723257	ENSMUSG00000018459	114644	Slc13a3
ENSMUSG00000071451	820.479	-0.581065	0.169163	-3.43494	0.00059268	0.00751919	ENSMUSG00000071451	69666	Psmg4
ENSMUSG00000038058	444.103	-0.928488	0.270576	-3.43152	0.000600209	0.00760353	ENSMUSG00000038058	107607	Nod1
ENSMUSG00000066684	23.983	-4.06054	1.18544	-3.42534	0.000614034	0.00775021	ENSMUSG00000066684	170741	Pilrb1
ENSMUSG00000033207	53.9273	-2.14663	0.626648	-3.42558	0.00061349	0.00775021	ENSMUSG00000033207	71738	Mamdc2
ENSMUSG00000022514	723.11	-0.714217	0.208784	-3.42084	0.000624276	0.00785076	ENSMUSG00000022514	16180	Il1rap
ENSMUSG00000026433	716.978	-0.660952	0.193243	-3.42031	0.0006255	0.00786043	ENSMUSG00000026433	226422	Rab29
ENSMUSG00000022867	947.221	-0.642044	0.187753	-3.41962	0.00062709	0.00787154	ENSMUSG00000022867	30940	Usp25
ENSMUSG00000038692	122.316	-1.5865	0.464147	-3.4181	0.000630598	0.00790722	ENSMUSG00000038692	15412	Hoxb4
ENSMUSG00000031520	105.038	-2.44411	0.715406	-3.4164	0.000634552	0.00795103	ENSMUSG00000031520	22341	Vegfc
ENSMUSG00000050721	1382	-0.602323	0.176638	-3.40992	0.00064982	0.00813052	ENSMUSG00000050721	102595	Plekho2
ENSMUSG00000048832	700.336	-0.626604	0.183848	-3.40828	0.000653741	0.00817365	ENSMUSG00000048832	107305	Vps37c
ENSMUSG00000027070	12.355	-5.22364	1.53337	-3.40665	0.000657649	0.00821656	ENSMUSG00000027070	14725	Lrp2
ENSMUSG00000031380	1170.35	-0.973391	0.285753	-3.4064	0.000658249	0.0082181	ENSMUSG00000031380	14205	Vegfd
ENSMUSG00000062070	274.243	-1.11662	0.328092	-3.40337	0.000665599	0.00829787	ENSMUSG00000062070	18655	Pgk1
ENSMUSG00000097635	15.3245	-3.96509	1.16557	-3.40184	0.000669325	0.0083383	ENSMUSG00000097635	NA	Gm26826
ENSMUSG00000040280	71.2212	-2.95396	0.868619	-3.40075	0.000672011	0.00835968	ENSMUSG00000040280	407790	Ndufa4l2
ENSMUSG00000040447	64.8359	-1.73215	0.510838	-3.39079	0.000696912	0.00865697	ENSMUSG00000040447	216892	Spns2
ENSMUSG00000022564	3201.63	-0.659054	0.194411	-3.39001	0.00069891	0.00867554	ENSMUSG00000022564	66168	Grina
ENSMUSG00000079465	9.26335	-5.20584	1.53783	-3.38518	0.000711308	0.00882309	ENSMUSG00000079465	12828	Col4a3
ENSMUSG00000097636	6.66125	-5.98179	1.7686	-3.38222	0.000719033	0.00890197	ENSMUSG00000097636	NA	Mirt1
ENSMUSG00000036402	4214.88	-0.539196	0.159588	-3.37868	0.000728336	0.00898264	ENSMUSG00000036402	14701	Gng12
ENSMUSG00000030341	3930.18	-0.486923	0.144185	-3.37707	0.000732617	0.00902826	ENSMUSG00000030341	21937	Tnfrsf1a
ENSMUSG00000037686	151.933	-1.12943	0.334458	-3.3769	0.000733082	0.00902826	ENSMUSG00000037686	104816	Aspg
ENSMUSG00000038296	241.102	-1.82981	0.542514	-3.37283	0.000743984	0.00912346	ENSMUSG00000038296	233733	Galnt18
ENSMUSG00000003955	1521.52	-0.880404	0.26118	-3.37087	0.000749309	0.00918223	ENSMUSG00000003955	70186	Fam162a
ENSMUSG00000025875	748.376	-0.9015	0.267566	-3.36927	0.000753685	0.00922275	ENSMUSG00000025875	74257	Tspan17
ENSMUSG00000032902	632.833	-1.19813	0.35615	-3.36412	0.000767876	0.00937012	ENSMUSG00000032902	20501	Slc16a1
ENSMUSG00000022257	1512.3	-0.549624	0.163487	-3.36188	0.000774126	0.00943274	ENSMUSG00000022257	114128	Laptm4b
ENSMUSG00000117698	8.58932	-5.48934	1.63426	-3.35891	0.000782502	0.00952808	ENSMUSG00000117698	100502982	BC037704
ENSMUSG00000074649	104.236	-1.30191	0.387809	-3.3571	0.000787643	0.00957716	ENSMUSG00000074649	613262	BC029722
ENSMUSG00000019214	14.5597	-4.19346	1.24998	-3.35483	0.000794144	0.00963584	ENSMUSG00000019214	214901	Chtf18
ENSMUSG00000020097	2109.17	-0.42516	0.126753	-3.35425	0.000795814	0.00964254	ENSMUSG00000020097	20397	Sgpl1
ENSMUSG00000036931	46.7	-1.60453	0.478673	-3.35204	0.000802191	0.00970617	ENSMUSG00000036931	243910	Nfkbid
ENSMUSG00000004768	557.499	-0.554495	0.165572	-3.34896	0.000811159	0.00978723	ENSMUSG00000004768	19335	Rab23
ENSMUSG00000002897	988.907	-0.90157	0.269258	-3.34835	0.000812941	0.00980188	ENSMUSG00000002897	16172	Il17ra
ENSMUSG00000030717	2039.8	-0.914196	0.273355	-3.34436	0.000824731	0.00993016	ENSMUSG00000030717	56312	Nupr1
ENSMUSG00000003863	28.763	-3.49472	1.0449	-3.34455	0.000824162	0.00993016	ENSMUSG00000003863	76787	Ppfia3
ENSMUSG00000029055	25.3093	-3.5808	1.07088	-3.34379	0.000826429	0.00993673	ENSMUSG00000029055	269615	Plch2
ENSMUSG00000021024	3621.08	-0.415938	0.124443	-3.3424	0.00083056	0.00997944	ENSMUSG00000021024	26443	Psma6
ENSMUSG00000060639	377.067	-0.730985	0.218995	-3.33791	0.000844127	0.0101002	ENSMUSG00000060639	319158	H4c9
ENSMUSG00000044254	19.3202	-5.11138	1.53276	-3.33475	0.000853767	0.0102015	ENSMUSG00000044254	100102	Pcsk9
ENSMUSG00000032561	75.659	-2.48731	0.746479	-3.33206	0.000862045	0.0102846	ENSMUSG00000032561	56318	Acpp
ENSMUSG00000035184	80.9546	-1.59971	0.480222	-3.33119	0.000864751	0.0103026	ENSMUSG00000035184	629059	Fam124a
ENSMUSG00000026209	2045.88	-0.430145	0.129268	-3.32753	0.000876183	0.010426	ENSMUSG00000026209	13437	Dnpep
ENSMUSG00000031387	532.316	-0.686511	0.206326	-3.32732	0.000876871	0.010427	ENSMUSG00000031387	19703	Renbp
ENSMUSG00000071657	2593.34	-0.409896	0.12343	-3.32088	0.00089733	0.0106482	ENSMUSG00000071657	14705	Bscl2
ENSMUSG00000047045	677.372	-0.510874	0.153894	-3.31965	0.000901312	0.0106881	ENSMUSG00000047045	209497	Tmem164
ENSMUSG00000025289	4654.65	-0.451678	0.136421	-3.31092	0.000929885	0.0110043	ENSMUSG00000025289	53381	Prdx4
ENSMUSG00000054905	12.5642	-5.53029	1.67086	-3.30985	0.000933462	0.011039	ENSMUSG00000054905	20863	Stfa3
ENSMUSG00000063727	1191.04	-0.579866	0.175232	-3.30914	0.000935826	0.0110594	ENSMUSG00000063727	18383	Tnfrsf11b
ENSMUSG00000032802	2038.34	-0.443249	0.134034	-3.30698	0.000943064	0.0111069	ENSMUSG00000032802	76650	Srxn1
ENSMUSG00000043036	8.31147	-4.4987	1.36233	-3.30222	0.000959243	0.0112744	ENSMUSG00000043036	330188	Ccdc63
ENSMUSG00000053030	29.6517	-2.62857	0.796659	-3.29949	0.000968618	0.0113691	ENSMUSG00000053030	69982	Spink2
ENSMUSG00000026303	15.2511	-3.75094	1.13773	-3.29686	0.000977711	0.0114602	ENSMUSG00000026303	171531	Mlph
ENSMUSG00000000317	9.4881	-5.85614	1.77684	-3.29582	0.000981357	0.0114951	ENSMUSG00000000317	12029	Bcl6b
ENSMUSG00000086866	14.5565	-4.94025	1.49965	-3.29427	0.00098676	0.0115427	ENSMUSG00000086866	NA	4930512H18Rik
ENSMUSG00000000339	1030.95	-0.524046	0.159171	-3.29234	0.00099356	0.0116066	ENSMUSG00000000339	66368	Rtca
ENSMUSG00000030895	15.5139	-3.85647	1.172	-3.29052	0.00100004	0.0116665	ENSMUSG00000030895	15458	Hpx
ENSMUSG00000002688	456.185	-0.675728	0.205815	-3.28317	0.00102645	0.0119408	ENSMUSG00000002688	18760	Prkd1
ENSMUSG00000025612	714.67	-0.691952	0.210767	-3.28302	0.00102702	0.0119408	ENSMUSG00000025612	12013	Bach1
ENSMUSG00000060568	47.4787	-2.13146	0.649372	-3.28235	0.00102946	0.0119457	ENSMUSG00000060568	226610	Fam78b
ENSMUSG00000005800	135.226	-3.78069	1.15183	-3.28233	0.00102951	0.0119457	ENSMUSG00000005800	17394	Mmp8
ENSMUSG00000002658	1141.43	-0.504258	0.153846	-3.27767	0.00104667	0.0121204	ENSMUSG00000002658	98053	Gtf2f1
ENSMUSG00000039616	245.706	-0.970191	0.296493	-3.27222	0.00106706	0.0123316	ENSMUSG00000039616	68591	Mocos
ENSMUSG00000058446	333.972	-0.738378	0.225806	-3.26997	0.00107561	0.0124214	ENSMUSG00000058446	387524	Znrf2
ENSMUSG00000050578	17579.2	-3.38085	1.03397	-3.26979	0.00107627	0.0124214	ENSMUSG00000050578	17386	Mmp13
ENSMUSG00000040584	50.3015	-2.66889	0.816482	-3.26877	0.00108016	0.0124579	ENSMUSG00000040584	18671	Abcb1a
ENSMUSG00000019951	2316.01	-0.537116	0.164476	-3.26563	0.00109223	0.0125803	ENSMUSG00000019951	75089	Uhrf1bp1l
ENSMUSG00000035505	670.437	-0.854687	0.261864	-3.26386	0.00109907	0.0126338	ENSMUSG00000035505	231430	Cox18
ENSMUSG00000028837	1922.14	-0.61727	0.189544	-3.25661	0.00112751	0.0129435	ENSMUSG00000028837	26445	Psmb2
ENSMUSG00000053395	15.1445	-4.38258	1.34721	-3.25308	0.00114162	0.013062	ENSMUSG00000053395	81905	Cacng8
ENSMUSG00000028163	950.106	-0.588127	0.180916	-3.25082	0.00115072	0.0131487	ENSMUSG00000028163	18033	Nfkb1
ENSMUSG00000003062	832.681	-0.532801	0.163947	-3.24984	0.0011547	0.0131854	ENSMUSG00000003062	76205	Stard3nl
ENSMUSG00000030339	5805.86	-0.397818	0.122439	-3.24911	0.00115767	0.0132106	ENSMUSG00000030339	17000	Ltbr
ENSMUSG00000056310	363.404	-0.711551	0.21911	-3.24746	0.00116439	0.0132697	ENSMUSG00000056310	100929	Tyw1
ENSMUSG00000040329	207.417	-1.12036	0.345315	-3.24446	0.00117674	0.0133928	ENSMUSG00000040329	16196	Il7
ENSMUSG00000069744	4879.31	-0.43388	0.133811	-3.24247	0.00118498	0.0134511	ENSMUSG00000069744	26446	Psmb3
ENSMUSG00000087385	98.7839	-1.12858	0.348107	-3.24204	0.00118679	0.0134628	ENSMUSG00000087385	433752	Frg2f1
ENSMUSG00000094910	90.3502	-1.5214	0.469663	-3.23934	0.00119805	0.0135816	ENSMUSG00000094910	268595	D430019H16Rik
ENSMUSG00000040950	11.7742	-4.67618	1.44453	-3.23717	0.00120721	0.0136765	ENSMUSG00000040950	216864	Mgl2
ENSMUSG00000086290	821.698	-0.559084	0.172756	-3.23627	0.00121101	0.0137105	ENSMUSG00000086290	100039864	Snhg12
ENSMUSG00000022385	505.449	-0.735587	0.22752	-3.23306	0.00122471	0.0138565	ENSMUSG00000022385	29870	Gtse1
ENSMUSG00000118633	6.6082	-5.75517	1.78022	-3.23285	0.00122561	0.0138576	ENSMUSG00000118633	65958	Gm21104
ENSMUSG00000001418	2670.77	-0.445987	0.138024	-3.23122	0.00123262	0.0139277	ENSMUSG00000001418	56700	Glmp
ENSMUSG00000029622	29036.8	-0.405674	0.125557	-3.231	0.00123357	0.0139294	ENSMUSG00000029622	11867	Arpc1b
ENSMUSG00000022370	1689.81	-0.485286	0.150244	-3.22998	0.001238	0.0139611	ENSMUSG00000022370	68537	Mrpl13
ENSMUSG00000024798	17.9978	-4.76606	1.47713	-3.22656	0.00125287	0.0141103	ENSMUSG00000024798	15566	Htr7
ENSMUSG00000022237	10.0692	-4.31601	1.33773	-3.22637	0.0012537	0.0141104	ENSMUSG00000022237	67434	Ankrd33b
ENSMUSG00000073676	4736.74	-0.448987	0.139246	-3.22441	0.00126234	0.01418	ENSMUSG00000073676	15528	Hspe1
ENSMUSG00000056476	66.4112	-1.86063	0.577032	-3.22449	0.00126197	0.01418	ENSMUSG00000056476	329650	Med12l
ENSMUSG00000046623	36.4673	-1.91524	0.594155	-3.22347	0.00126648	0.0142079	ENSMUSG00000046623	14621	Gjb4
ENSMUSG00000031488	30.727	-2.40904	0.747304	-3.22364	0.00126574	0.0142079	ENSMUSG00000031488	75767	Rab11fip1
ENSMUSG00000013584	51.5229	-1.65925	0.514816	-3.22301	0.00126853	0.0142217	ENSMUSG00000013584	19378	Aldh1a2
ENSMUSG00000000563	4366.44	-0.513146	0.159275	-3.22176	0.00127405	0.0142743	ENSMUSG00000000563	11950	Atp5pb
ENSMUSG00000069135	289.698	-0.712362	0.221383	-3.21778	0.00129189	0.014446	ENSMUSG00000069135	75296	Cep43
ENSMUSG00000002257	553.929	-0.603828	0.187842	-3.21456	0.00130645	0.0145805	ENSMUSG00000002257	23853	Def6
ENSMUSG00000078922	19.5144	-4.08547	1.27129	-3.21363	0.00131068	0.0146088	ENSMUSG00000078922	21822	Tgtp1
ENSMUSG00000030894	5175.67	-0.410505	0.12787	-3.21033	0.00132581	0.0147489	ENSMUSG00000030894	12751	Tpp1
ENSMUSG00000022324	1485.53	-0.656088	0.204648	-3.20594	0.00134623	0.0149375	ENSMUSG00000022324	17181	Matn2
ENSMUSG00000030595	1060.53	-0.426254	0.132971	-3.20562	0.00134774	0.0149447	ENSMUSG00000030595	18036	Nfkbib
ENSMUSG00000034708	38649.9	-0.526364	0.164401	-3.20172	0.0013661	0.0150998	ENSMUSG00000034708	14824	Grn
ENSMUSG00000037012	2375.49	-0.497894	0.155655	-3.1987	0.00138051	0.0152248	ENSMUSG00000037012	15275	Hk1
ENSMUSG00000032388	1876.69	-0.530225	0.165979	-3.19453	0.00140059	0.0154119	ENSMUSG00000032388	27965	Spg21
ENSMUSG00000097415	304.914	-0.92581	0.289979	-3.19268	0.00140957	0.0154909	ENSMUSG00000097415	NA	AU020206
ENSMUSG00000071379	889.154	-0.60743	0.190342	-3.19125	0.00141657	0.0155481	ENSMUSG00000071379	53602	Hpcal1
ENSMUSG00000041695	124.576	-1.53167	0.480055	-3.19061	0.00141972	0.0155727	ENSMUSG00000041695	16518	Kcnj2
ENSMUSG00000098092	18.1358	-3.29086	1.03218	-3.18826	0.0014313	0.0156797	ENSMUSG00000098092	NA	Gm2076
ENSMUSG00000026701	3588.99	-0.573001	0.179882	-3.18542	0.00144544	0.0158046	ENSMUSG00000026701	11758	Prdx6
ENSMUSG00000071984	475.713	-0.859755	0.270006	-3.18421	0.00145151	0.0158609	ENSMUSG00000071984	68655	Fndc1
ENSMUSG00000074577	166.262	-1.49566	0.470048	-3.18193	0.001463	0.0159662	ENSMUSG00000074577	69553	Ripor3
ENSMUSG00000097211	15.1665	-2.96966	0.934116	-3.17911	0.00147726	0.0160913	ENSMUSG00000097211	100502819	BC065403
ENSMUSG00000101132	16.8042	-4.35109	1.37039	-3.17508	0.00149796	0.0162756	ENSMUSG00000101132	NA	Gm8000
ENSMUSG00000040017	9.40181	-5.66432	1.78421	-3.1747	0.0014999	0.0162865	ENSMUSG00000040017	20211	Saa4
ENSMUSG00000091191	148.936	-1.12481	0.354422	-3.17364	0.0015054	0.0163359	ENSMUSG00000091191	NA	Gm17334
ENSMUSG00000001435	3312.9	-0.549734	0.173376	-3.17077	0.00152037	0.0164776	ENSMUSG00000001435	12822	Col18a1
ENSMUSG00000058600	7202.55	-0.434182	0.136953	-3.1703	0.00152283	0.0164836	ENSMUSG00000058600	19946	Rpl30
ENSMUSG00000026579	197.242	-4.476	1.41265	-3.16852	0.00153217	0.0165639	ENSMUSG00000026579	14067	F5
ENSMUSG00000019558	1038.79	-0.584261	0.184596	-3.16508	0.00155039	0.0167086	ENSMUSG00000019558	102857	Slc6a8
ENSMUSG00000068735	144.089	-2.05003	0.648099	-3.16314	0.00156076	0.0167888	ENSMUSG00000068735	277414	Trp53i11
ENSMUSG00000071415	22759	-0.378847	0.119829	-3.16156	0.00156926	0.0168593	ENSMUSG00000071415	65019	Rpl23
ENSMUSG00000052593	1911.53	-0.477962	0.151191	-3.16132	0.00157055	0.0168627	ENSMUSG00000052593	11491	Adam17
ENSMUSG00000030069	13.246	-4.77024	1.51015	-3.15879	0.00158425	0.0169992	ENSMUSG00000030069	50501	Prok2
ENSMUSG00000070167	31.2326	-2.6255	0.83132	-3.15824	0.00158726	0.017015	ENSMUSG00000070167	118027464	Snora57
ENSMUSG00000063838	682.369	-0.654762	0.207452	-3.15622	0.0015983	0.017118	ENSMUSG00000063838	58804	Cdc42ep5
ENSMUSG00000029752	920.475	-0.539452	0.171059	-3.1536	0.00161268	0.0172079	ENSMUSG00000029752	27053	Asns
ENSMUSG00000032376	741.848	-0.515001	0.163361	-3.15252	0.00161866	0.017261	ENSMUSG00000032376	235441	Usp3
ENSMUSG00000078921	12.738	-4.14942	1.31659	-3.15165	0.00162352	0.0173021	ENSMUSG00000078921	100039796	Tgtp2
ENSMUSG00000063457	16600.6	-0.341917	0.108519	-3.15077	0.00162841	0.0173329	ENSMUSG00000063457	20054	Rps15
ENSMUSG00000031659	317.081	-0.812623	0.258023	-3.14942	0.00163593	0.0173914	ENSMUSG00000031659	11513	Adcy7
ENSMUSG00000029131	1553	-0.41796	0.132795	-3.1474	0.00164728	0.0174691	ENSMUSG00000029131	23950	Dnajb6
ENSMUSG00000036943	911.174	-0.565995	0.179816	-3.14763	0.00164602	0.0174691	ENSMUSG00000036943	235442	Rab8b
ENSMUSG00000037720	1539.11	-0.457728	0.145536	-3.14512	0.00166016	0.0175841	ENSMUSG00000037720	67878	Tmem33
ENSMUSG00000036356	1176.11	-0.807723	0.256814	-3.14517	0.00165993	0.0175841	ENSMUSG00000036356	234356	Csgalnact1
ENSMUSG00000036103	2335.19	-0.432013	0.137482	-3.14233	0.00167607	0.01772	ENSMUSG00000036103	140792	Colec12
ENSMUSG00000021892	1597.17	-0.518471	0.16509	-3.14053	0.00168643	0.0177967	ENSMUSG00000021892	24056	Sh3bp5
ENSMUSG00000025169	333.629	-0.669893	0.213387	-3.13933	0.00169336	0.017848	ENSMUSG00000025169	66179	Ogfod3
ENSMUSG00000034334	68.2175	-1.89891	0.606058	-3.13322	0.00172898	0.0181679	ENSMUSG00000034334	73942	Fam151b
ENSMUSG00000062082	24.3718	-3.06355	0.97856	-3.13067	0.00174409	0.0182934	ENSMUSG00000062082	239849	Cd200r4
ENSMUSG00000028048	2362.62	-0.459959	0.147014	-3.12868	0.00175593	0.018384	ENSMUSG00000028048	14466	Gba
ENSMUSG00000033684	26664.1	-0.342948	0.109669	-3.12711	0.00176534	0.0184489	ENSMUSG00000033684	104009	Qsox1
ENSMUSG00000025324	268.314	-1.06936	0.341957	-3.12718	0.00176493	0.0184489	ENSMUSG00000025324	11982	Atp10a
ENSMUSG00000056296	8.40228	-4.98064	1.59265	-3.12726	0.00176443	0.0184489	ENSMUSG00000056296	72003	Synpr
ENSMUSG00000084106	119.925	-0.94925	0.303672	-3.1259	0.00177262	0.0185138	ENSMUSG00000084106	NA	Gm6136
ENSMUSG00000028495	1366.94	-0.494008	0.158249	-3.12171	0.00179803	0.0187451	ENSMUSG00000028495	20104	Rps6
ENSMUSG00000032381	969.203	-0.487577	0.156247	-3.12055	0.00180513	0.018791	ENSMUSG00000032381	68250	Ciao2a
ENSMUSG00000022887	2193.87	-0.670938	0.215013	-3.12046	0.00180569	0.018791	ENSMUSG00000022887	17174	Masp1
ENSMUSG00000051518	1281.54	-0.454034	0.145671	-3.11684	0.001828	0.0190002	ENSMUSG00000051518	66538	Rps19bp1
ENSMUSG00000032265	8086.25	-0.407509	0.130807	-3.11535	0.00183725	0.0190618	ENSMUSG00000032265	212943	Tent5a
ENSMUSG00000061751	722.26	-0.499693	0.160417	-3.11496	0.00183969	0.0190758	ENSMUSG00000061751	545156	Kalrn
ENSMUSG00000056758	2062.41	-0.654155	0.210249	-3.11133	0.00186248	0.0192889	ENSMUSG00000056758	15364	Hmga2
ENSMUSG00000032359	3426.24	-0.606136	0.194861	-3.11061	0.00186705	0.0193245	ENSMUSG00000032359	13036	Ctsh
ENSMUSG00000113302	18.7975	-3.0755	0.98936	-3.10858	0.0018799	0.0194342	ENSMUSG00000113302	NA	Gm32219
ENSMUSG00000020029	2843.52	-0.586719	0.18879	-3.10778	0.00188498	0.0194518	ENSMUSG00000020029	71207	Nudt4
ENSMUSG00000023068	2197.09	-0.382404	0.123043	-3.10788	0.00188432	0.0194518	ENSMUSG00000023068	52014	Nus1
ENSMUSG00000033082	6.46355	-5.12083	1.64791	-3.10747	0.00188696	0.0194606	ENSMUSG00000033082	243653	Clec1a
ENSMUSG00000023873	28.61	-2.49827	0.804478	-3.10546	0.00189986	0.0195819	ENSMUSG00000023873	66931	1700010I14Rik
ENSMUSG00000011267	50.4997	-1.91819	0.617825	-3.10474	0.00190446	0.0195942	ENSMUSG00000011267	63872	Zfp296
ENSMUSG00000032344	312.43	-0.636896	0.20515	-3.10454	0.00190572	0.0195955	ENSMUSG00000032344	214763	Cgas
ENSMUSG00000038866	508.341	-0.648107	0.208987	-3.10118	0.0019275	0.0197704	ENSMUSG00000038866	227449	Zcchc2
ENSMUSG00000045827	721.167	-0.573975	0.185091	-3.10103	0.00192846	0.0197704	ENSMUSG00000045827	20723	Serpinb9
ENSMUSG00000044338	7.81053	-5.00701	1.61488	-3.10054	0.00193171	0.0197746	ENSMUSG00000044338	23796	Aplnr
ENSMUSG00000040957	231.732	-0.795412	0.256537	-3.10057	0.00193148	0.0197746	ENSMUSG00000040957	63955	Cables1
ENSMUSG00000060224	78.494	-1.75567	0.566263	-3.10045	0.0019323	0.0197746	ENSMUSG00000060224	74580	Pyroxd2
ENSMUSG00000060802	184378	-1.97076	0.636955	-3.09403	0.00197458	0.0201453	ENSMUSG00000060802	12010	B2m
ENSMUSG00000025521	468.941	-0.705186	0.227977	-3.09323	0.0019799	0.0201779	ENSMUSG00000025521	73067	Tmem192
ENSMUSG00000048706	801.172	-0.605613	0.195892	-3.09157	0.00199103	0.0202152	ENSMUSG00000048706	52829	Lurap1l
ENSMUSG00000041841	53064.5	-0.368843	0.119383	-3.08959	0.00200436	0.0203311	ENSMUSG00000041841	67281	Rpl37
ENSMUSG00000037119	1518.65	-0.438377	0.1419	-3.08933	0.00200611	0.0203369	ENSMUSG00000037119	210998	Fam91a1
ENSMUSG00000019842	191.645	-0.961464	0.311243	-3.08911	0.00200756	0.0203397	ENSMUSG00000019842	103213	Traf3ip2
ENSMUSG00000024803	1409	-0.85495	0.276886	-3.08774	0.00201685	0.0204021	ENSMUSG00000024803	107765	Ankrd1
ENSMUSG00000085984	20.9142	-3.2547	1.05461	-3.08616	0.00202758	0.0204584	ENSMUSG00000085984	69303	1700001G11Rik
ENSMUSG00000001056	791.396	-0.511069	0.16586	-3.08133	0.0020608	0.0207088	ENSMUSG00000001056	52530	Nhp2
ENSMUSG00000025076	219.902	-0.767858	0.249185	-3.08148	0.00205976	0.0207088	ENSMUSG00000025076	12369	Casp7
ENSMUSG00000071856	391.269	-0.816079	0.264911	-3.08058	0.00206597	0.0207487	ENSMUSG00000071856	328949	Mcc
ENSMUSG00000022754	2084.03	-0.513751	0.166888	-3.07842	0.002081	0.0208875	ENSMUSG00000022754	56277	Tmem45a
ENSMUSG00000008348	27756.2	-0.323513	0.105127	-3.07734	0.00208856	0.0209512	ENSMUSG00000008348	22190	Ubc
ENSMUSG00000116716	8.89125	-5.61346	1.82708	-3.07237	0.00212366	0.0212662	ENSMUSG00000116716	NA	Gm49643
ENSMUSG00000068744	942.457	-0.722209	0.235275	-3.06964	0.00214315	0.0214365	ENSMUSG00000068744	56742	Psrc1
ENSMUSG00000029321	37.4999	-2.67653	0.872501	-3.06765	0.00215751	0.0215676	ENSMUSG00000029321	75750	Slc10a6
ENSMUSG00000039683	47.7647	-1.81042	0.590398	-3.06644	0.00216622	0.0216421	ENSMUSG00000039683	330222	Sdk1
ENSMUSG00000012889	537.77	-0.816315	0.266501	-3.06308	0.00219071	0.0218489	ENSMUSG00000012889	244550	Podnl1
ENSMUSG00000024513	1625.45	-0.434757	0.142186	-3.05767	0.00223065	0.0222344	ENSMUSG00000024513	17191	Mbd2
ENSMUSG00000007458	1940.54	-0.395004	0.129302	-3.0549	0.00225139	0.0224023	ENSMUSG00000007458	17113	M6pr
ENSMUSG00000089862	183.253	-0.929331	0.30419	-3.0551	0.00224989	0.0224023	ENSMUSG00000089862	100036521	Umad1
ENSMUSG00000097336	26.151	-2.77896	0.909877	-3.05421	0.00225654	0.0224405	ENSMUSG00000097336	68790	Fendrr
ENSMUSG00000020601	2652.31	-0.440999	0.144512	-3.05165	0.0022759	0.022594	ENSMUSG00000020601	217410	Trib2
ENSMUSG00000063524	986.561	-0.971136	0.318332	-3.0507	0.00228307	0.0226522	ENSMUSG00000063524	13806	Eno1
ENSMUSG00000056429	4367.84	-0.420877	0.138028	-3.04921	0.00229442	0.0227125	ENSMUSG00000056429	22134	Tgoln1
ENSMUSG00000072941	9637.81	-0.566249	0.18586	-3.04665	0.00231407	0.0228808	ENSMUSG00000072941	20657	Sod3
ENSMUSG00000028273	2919.53	-0.415048	0.136312	-3.04483	0.00232808	0.022993	ENSMUSG00000028273	56376	Pdlim5
ENSMUSG00000028289	473.969	-0.852072	0.279971	-3.04343	0.00233901	0.0230672	ENSMUSG00000028289	13841	Epha7
ENSMUSG00000023930	14.5496	-3.1914	1.04865	-3.04335	0.0023396	0.0230672	ENSMUSG00000023930	22024	Crisp2
ENSMUSG00000020869	1141.48	-0.607829	0.199765	-3.04271	0.00234454	0.0231026	ENSMUSG00000020869	98238	Lrrc59
ENSMUSG00000072244	51.5326	-2.37495	0.781807	-3.03777	0.00238336	0.023405	ENSMUSG00000072244	94088	Trim6
ENSMUSG00000087213	88.5406	-1.45064	0.477522	-3.03786	0.00238268	0.023405	ENSMUSG00000087213	69941	2810408I11Rik
ENSMUSG00000032577	343.202	-0.610371	0.201097	-3.03521	0.00240367	0.0235776	ENSMUSG00000032577	102626	Mapkapk3
ENSMUSG00000026073	14.9938	-4.59718	1.51499	-3.03446	0.00240968	0.0236231	ENSMUSG00000026073	16178	Il1r2
ENSMUSG00000044813	170.855	-0.874861	0.288422	-3.03327	0.0024192	0.0236761	ENSMUSG00000044813	230126	Shb
ENSMUSG00000034438	9.38758	-5.71455	1.8845	-3.03239	0.00242622	0.0237306	ENSMUSG00000034438	76074	Gbp8
ENSMUSG00000068551	376.747	-0.69967	0.230744	-3.03223	0.00242752	0.0237306	ENSMUSG00000068551	68910	Zfp467
ENSMUSG00000068748	102.04	-1.22472	0.404389	-3.02858	0.00245707	0.0239651	ENSMUSG00000068748	19283	Ptprz1
ENSMUSG00000037419	748.962	-0.574339	0.189688	-3.02781	0.00246335	0.0240127	ENSMUSG00000037419	71946	Endod1
ENSMUSG00000037706	12200.4	-0.384714	0.127143	-3.02584	0.0024794	0.024142	ENSMUSG00000037706	12520	Cd81
ENSMUSG00000029311	1611.66	-0.414922	0.137273	-3.0226	0.00250609	0.0243469	ENSMUSG00000029311	114664	Hsd17b11
ENSMUSG00000045362	73.4934	-1.47452	0.487941	-3.02192	0.00251179	0.0243885	ENSMUSG00000045362	244237	Tnfrsf26
ENSMUSG00000029186	273.269	-0.76752	0.254104	-3.0205	0.00252361	0.0244522	ENSMUSG00000029186	67073	Pi4k2b
ENSMUSG00000001100	1532.16	-0.401519	0.132934	-3.02045	0.00252402	0.0244522	ENSMUSG00000001100	67811	Poldip2
ENSMUSG00000022570	917.493	-0.439423	0.145476	-3.02059	0.00252285	0.0244522	ENSMUSG00000022570	22122	Gfus
ENSMUSG00000015305	2437.19	-0.398635	0.13201	-3.01973	0.00253001	0.0244691	ENSMUSG00000015305	70097	Sash1
ENSMUSG00000043531	64.0449	-2.80101	0.928127	-3.01791	0.0025452	0.0245747	ENSMUSG00000043531	58178	Sorcs1
ENSMUSG00000042377	31.6066	-1.99367	0.660938	-3.01642	0.00255775	0.0246682	ENSMUSG00000042377	69640	Fam83g
ENSMUSG00000015671	7367.91	-0.397181	0.131728	-3.01515	0.00256849	0.0247303	ENSMUSG00000015671	19166	Psma2
ENSMUSG00000110588	15.4196	-3.84967	1.27687	-3.01492	0.00257043	0.0247352	ENSMUSG00000110588	NA	Gm45774
ENSMUSG00000044177	418.174	-0.723519	0.240093	-3.0135	0.00258254	0.0248241	ENSMUSG00000044177	278507	Wfikkn2
ENSMUSG00000021607	1267.06	-0.44031	0.14615	-3.01272	0.00258915	0.0248737	ENSMUSG00000021607	94066	Mrpl36
ENSMUSG00000029135	4701.69	-0.451384	0.149989	-3.00944	0.00261725	0.0251014	ENSMUSG00000029135	14284	Fosl2
ENSMUSG00000030747	265.612	-0.77554	0.257716	-3.00928	0.00261867	0.0251014	ENSMUSG00000030747	67800	Dgat2
ENSMUSG00000025321	203.012	-0.898053	0.29859	-3.00765	0.00263277	0.0252086	ENSMUSG00000025321	320910	Itgb8
ENSMUSG00000032491	1031.42	-0.530211	0.176313	-3.00721	0.00263656	0.0252309	ENSMUSG00000032491	67169	Nradd
ENSMUSG00000052316	347.293	-1.38399	0.460337	-3.00646	0.00264305	0.0252649	ENSMUSG00000052316	74488	Lrrc15
ENSMUSG00000031948	2862.62	-0.400868	0.133387	-3.00529	0.00265327	0.0253486	ENSMUSG00000031948	85305	Kars
ENSMUSG00000038235	73.556	-1.70265	0.567006	-3.00288	0.00267438	0.0254937	ENSMUSG00000038235	16456	F11r
ENSMUSG00000026826	1117.99	-0.661783	0.220566	-3.00039	0.00269635	0.0256598	ENSMUSG00000026826	18227	Nr4a2
ENSMUSG00000082755	10.2832	-3.97687	1.32548	-3.00032	0.00269698	0.0256598	ENSMUSG00000082755	NA	Gm8692
ENSMUSG00000056494	83.1054	-9.08201	3.02725	-3.00008	0.00269907	0.0256598	ENSMUSG00000056494	30952	Cngb3
ENSMUSG00000019779	384.232	-0.910999	0.30366	-3.00006	0.00269923	0.0256598	ENSMUSG00000019779	14302	Frk
ENSMUSG00000087150	50.9819	-2.37294	0.791235	-2.99904	0.00270834	0.025718	ENSMUSG00000087150	NA	BC064078
ENSMUSG00000004626	504.365	-0.621786	0.207324	-2.9991	0.0027078	0.025718	ENSMUSG00000004626	20911	Stxbp2
ENSMUSG00000034795	560.698	-0.585592	0.195294	-2.99851	0.00271298	0.0257338	ENSMUSG00000034795	108811	Ccdc122
ENSMUSG00000021764	1932.05	-0.416903	0.139206	-2.99486	0.00274573	0.0260016	ENSMUSG00000021764	17993	Ndufs4
ENSMUSG00000042419	557.997	-0.555255	0.185491	-2.99344	0.00275852	0.0260797	ENSMUSG00000042419	18038	Nfkbil1
ENSMUSG00000060131	103.815	-1.45423	0.485782	-2.99359	0.00275721	0.0260797	ENSMUSG00000060131	241633	Atp8b4
ENSMUSG00000044703	5.7157	-5.60645	1.87363	-2.9923	0.00276886	0.0261557	ENSMUSG00000044703	219131	Phf11a
ENSMUSG00000020142	928.372	-0.456064	0.152455	-2.99148	0.00277632	0.0261906	ENSMUSG00000020142	55963	Slc1a4
ENSMUSG00000042842	160.1	-1.25811	0.42064	-2.99095	0.00278111	0.0262215	ENSMUSG00000042842	20708	Serpinb6b
ENSMUSG00000079057	538.524	-0.779286	0.260613	-2.99021	0.0027879	0.0262282	ENSMUSG00000079057	102294	Cyp4v3
ENSMUSG00000079669	127.32	-0.922304	0.308412	-2.99049	0.00278531	0.0262282	ENSMUSG00000079669	102635502	Gm17396
ENSMUSG00000023473	10.344	-3.99046	1.33438	-2.99051	0.00278511	0.0262282	ENSMUSG00000023473	107934	Celsr3
ENSMUSG00000021113	705.486	-0.573303	0.191718	-2.99035	0.00278661	0.0262282	ENSMUSG00000021113	75627	Snapc1
ENSMUSG00000062456	267.048	-0.66891	0.223731	-2.98979	0.00279172	0.0262498	ENSMUSG00000062456	NA	Rpl9-ps6
ENSMUSG00000031813	935.526	-0.427907	0.143146	-2.9893	0.00279612	0.0262626	ENSMUSG00000031813	73711	Mvb12a
ENSMUSG00000026249	17081.1	-0.590223	0.197966	-2.98144	0.00286897	0.0268456	ENSMUSG00000026249	20720	Serpine2
ENSMUSG00000031527	686.166	-0.503059	0.168721	-2.9816	0.0028675	0.0268456	ENSMUSG00000031527	67276	Eri1
ENSMUSG00000037816	724.707	-0.479173	0.160719	-2.98143	0.00286909	0.0268456	ENSMUSG00000037816	109082	Fbxw17
ENSMUSG00000024664	1341.84	-0.447645	0.150159	-2.98114	0.00287178	0.0268562	ENSMUSG00000024664	60527	Fads3
ENSMUSG00000046031	41.2802	-2.18971	0.734653	-2.9806	0.00287688	0.0268893	ENSMUSG00000046031	215900	Calhm6
ENSMUSG00000055943	2488.84	-0.379029	0.127202	-2.97974	0.00288491	0.0269497	ENSMUSG00000055943	73024	Emc7
ENSMUSG00000016319	3160.1	-0.429522	0.144205	-2.97855	0.00289616	0.0270402	ENSMUSG00000016319	11740	Slc25a5
ENSMUSG00000103292	73.9864	-1.56995	0.527975	-2.97353	0.00294394	0.0274566	ENSMUSG00000103292	NA	Gm35048
ENSMUSG00000049517	10049.2	-0.469961	0.158083	-2.97288	0.00295024	0.0275005	ENSMUSG00000049517	66475	Rps23
ENSMUSG00000042812	177.101	-0.939801	0.316334	-2.97092	0.00296911	0.0275721	ENSMUSG00000042812	15227	Foxf1
ENSMUSG00000004394	1217.57	-0.430706	0.145193	-2.96644	0.00301271	0.027902	ENSMUSG00000004394	103694	Tmed4
ENSMUSG00000067288	24508.8	-0.365706	0.123431	-2.96284	0.00304813	0.0282149	ENSMUSG00000067288	54127	Rps28
ENSMUSG00000038299	889.674	-0.482075	0.162769	-2.96171	0.00305935	0.0282884	ENSMUSG00000038299	225348	Wdr36
ENSMUSG00000038963	14.6591	-3.75511	1.2681	-2.96121	0.00306433	0.0283192	ENSMUSG00000038963	108115	Slco4a1
ENSMUSG00000006930	18.4574	-4.7592	1.60748	-2.96066	0.0030698	0.0283546	ENSMUSG00000006930	15114	Hap1
ENSMUSG00000048826	69.6048	-2.26183	0.764202	-2.95973	0.00307905	0.0284248	ENSMUSG00000048826	240025	Dact2
ENSMUSG00000085334	9.10106	-4.28824	1.45259	-2.95213	0.00315592	0.0290102	ENSMUSG00000085334	NA	Gm12940
ENSMUSG00000022114	922.968	-0.452089	0.153186	-2.95125	0.00316491	0.0290774	ENSMUSG00000022114	24064	Spry2
ENSMUSG00000039232	326.734	-0.845062	0.286396	-2.95068	0.00317075	0.0291001	ENSMUSG00000039232	74732	Stx11
ENSMUSG00000022479	748.792	-1.03121	0.349868	-2.94743	0.00320424	0.0293577	ENSMUSG00000022479	22337	Vdr
ENSMUSG00000016257	1354.3	-0.387895	0.131611	-2.9473	0.00320563	0.0293578	ENSMUSG00000016257	66390	Prelid3b
ENSMUSG00000024457	1094.99	-0.496404	0.168502	-2.94598	0.00321928	0.0294515	ENSMUSG00000024457	22670	Trim26
ENSMUSG00000006763	420.88	-0.597695	0.203129	-2.94243	0.00325647	0.0297338	ENSMUSG00000006763	78935	Saal1
ENSMUSG00000117446	7.04331	-5.05995	1.71986	-2.94207	0.00326027	0.0297338	ENSMUSG00000117446	NA	Gm35551
ENSMUSG00000028487	192.526	-1.06891	0.363753	-2.93856	0.00329742	0.0299756	ENSMUSG00000028487	242509	Bnc2
ENSMUSG00000002900	4394.19	-0.56187	0.19128	-2.93743	0.00330949	0.0300537	ENSMUSG00000002900	16777	Lamb1
ENSMUSG00000071656	160.756	-1.22756	0.418307	-2.93459	0.00333992	0.0302662	ENSMUSG00000071656	68852	Lrrn4cl
ENSMUSG00000026893	32.3469	-2.08937	0.711964	-2.93466	0.00333913	0.0302662	ENSMUSG00000026893	227960	Gca
ENSMUSG00000092183	31.8311	-2.33599	0.796371	-2.9333	0.00335385	0.0303606	ENSMUSG00000092183	67642	4930515G01Rik
ENSMUSG00000012422	4641.78	-0.355335	0.121202	-2.93175	0.00337052	0.0304955	ENSMUSG00000012422	66074	Tmem167
ENSMUSG00000048490	1614.63	-0.466768	0.159237	-2.93129	0.00337559	0.0305037	ENSMUSG00000048490	268903	Nrip1
ENSMUSG00000017740	16.1222	-3.5881	1.22423	-2.9309	0.00337986	0.030516	ENSMUSG00000017740	57138	Slc12a5
ENSMUSG00000035354	1000.06	-0.454199	0.155091	-2.92859	0.00340502	0.0306789	ENSMUSG00000035354	78610	Uvrag
ENSMUSG00000044533	15062.2	-0.418351	0.142844	-2.92872	0.00340357	0.0306789	ENSMUSG00000044533	16898	Rps2
ENSMUSG00000037095	26.1346	-2.5388	0.867138	-2.92779	0.00341383	0.0307262	ENSMUSG00000037095	76905	Lrg1
ENSMUSG00000032899	76.5841	-1.82632	0.624059	-2.92651	0.00342786	0.0308203	ENSMUSG00000032899	243659	Styk1
ENSMUSG00000048285	2341.15	-0.356055	0.121824	-2.92271	0.00346997	0.0311503	ENSMUSG00000048285	319710	Frmd6
ENSMUSG00000020307	1511.16	-0.4653	0.159272	-2.92141	0.00348447	0.031248	ENSMUSG00000020307	216150	Cdc34
ENSMUSG00000044217	48.9762	-2.11284	0.72322	-2.92143	0.00348424	0.031248	ENSMUSG00000044217	11830	Aqp5
ENSMUSG00000004069	495.024	-0.523875	0.179337	-2.92118	0.00348708	0.0312551	ENSMUSG00000004069	83945	Dnaja3
ENSMUSG00000078923	6.86121	-5.00467	1.71503	-2.91812	0.00352147	0.0314979	ENSMUSG00000078923	66589	Ube2v1
ENSMUSG00000109876	11.8795	-3.75874	1.28849	-2.91718	0.00353213	0.0315606	ENSMUSG00000109876	NA	Gm45449
ENSMUSG00000030432	7903.18	-0.397565	0.136401	-2.91467	0.00356065	0.031766	ENSMUSG00000030432	19943	Rpl28
ENSMUSG00000029659	2721.44	-0.400035	0.137493	-2.9095	0.00362009	0.0321716	ENSMUSG00000029659	70717	Medag
ENSMUSG00000037410	1671.06	-0.565148	0.19434	-2.90804	0.00363699	0.032247	ENSMUSG00000037410	67016	Tbc1d2b
ENSMUSG00000055652	309.669	-0.71604	0.246255	-2.90771	0.00364081	0.0322643	ENSMUSG00000055652	207952	Klhl25
ENSMUSG00000024583	2984.7	-0.361218	0.124272	-2.90667	0.00365302	0.0323167	ENSMUSG00000024583	53382	Txnl1
ENSMUSG00000087067	19.1746	-2.82459	0.972425	-2.90468	0.00367625	0.0324949	ENSMUSG00000087067	100127433	Gm11532
ENSMUSG00000051124	72.6894	-1.52946	0.526868	-2.90292	0.00369699	0.0326281	ENSMUSG00000051124	317758	Gimap9
ENSMUSG00000052566	167.063	-0.832383	0.286839	-2.90192	0.00370885	0.0326992	ENSMUSG00000052566	170833	Hook2
ENSMUSG00000044641	12.7116	-3.64208	1.25547	-2.90097	0.0037201	0.0327626	ENSMUSG00000044641	58220	Pard6b
ENSMUSG00000038990	367.96	-0.665107	0.229301	-2.90058	0.00372469	0.032772	ENSMUSG00000038990	252966	Cables2
ENSMUSG00000024208	3979.41	-0.428526	0.147796	-2.89944	0.00373835	0.0328753	ENSMUSG00000024208	67267	Uqcc2
ENSMUSG00000056498	213.912	-0.956058	0.329844	-2.89852	0.00374929	0.0329548	ENSMUSG00000056498	320782	Tmem154
ENSMUSG00000048756	1536.04	-0.397351	0.137103	-2.89818	0.00375331	0.0329733	ENSMUSG00000048756	56484	Foxo3
ENSMUSG00000022311	7.37875	-5.5885	1.93153	-2.8933	0.0038121	0.0334218	ENSMUSG00000022311	239420	Csmd3
ENSMUSG00000108042	10.597	-3.37403	1.16641	-2.89267	0.00381981	0.0334723	ENSMUSG00000108042	NA	B130021K23Rik
ENSMUSG00000104713	35.9274	-6.55677	2.27109	-2.88706	0.00388858	0.0340231	ENSMUSG00000104713	100702	Gbp6
ENSMUSG00000014313	18139.2	-0.35635	0.123489	-2.88569	0.00390563	0.034155	ENSMUSG00000014313	12864	Cox6c
ENSMUSG00000028033	96.0236	-1.42142	0.492786	-2.88445	0.00392093	0.0342714	ENSMUSG00000028033	226922	Kcnq5
ENSMUSG00000030283	11.9166	-4.47337	1.55117	-2.88387	0.00392816	0.0343035	ENSMUSG00000030283	20449	St8sia1
ENSMUSG00000030029	56.5365	-1.84206	0.638752	-2.88384	0.00392858	0.0343035	ENSMUSG00000030029	16206	Lrig1
ENSMUSG00000024885	273.167	-0.730366	0.253652	-2.8794	0.00398429	0.0346672	ENSMUSG00000024885	67689	Aldh3b1
ENSMUSG00000020826	70.3487	-8.71069	3.02758	-2.87711	0.00401334	0.0348847	ENSMUSG00000020826	18126	Nos2
ENSMUSG00000020950	34.5137	-2.81332	0.978222	-2.87595	0.00402813	0.0349956	ENSMUSG00000020950	15228	Foxg1
ENSMUSG00000021094	1050.59	-0.527229	0.183343	-2.87564	0.00403214	0.0350128	ENSMUSG00000021094	66375	Dhrs7
ENSMUSG00000030017	64.265	-8.70545	3.02757	-2.8754	0.00403521	0.0350219	ENSMUSG00000030017	19695	Reg3g
ENSMUSG00000025085	894.607	-0.696205	0.242363	-2.87257	0.00407147	0.0352763	ENSMUSG00000025085	226251	Ablim1
ENSMUSG00000040562	1379.7	-0.933756	0.325719	-2.86675	0.00414709	0.035777	ENSMUSG00000040562	14863	Gstm2
ENSMUSG00000040511	466.137	-0.663278	0.231388	-2.86652	0.00415012	0.0357852	ENSMUSG00000040511	52118	Pvr
ENSMUSG00000106290	9.2216	-4.42966	1.54574	-2.86573	0.00416052	0.035857	ENSMUSG00000106290	NA	Gm43429
ENSMUSG00000032306	562.08	-0.596455	0.20826	-2.864	0.00418333	0.0359996	ENSMUSG00000032306	110119	Mpi
ENSMUSG00000069713	7.1151	-4.84739	1.69507	-2.8597	0.00424036	0.0364177	ENSMUSG00000069713	NA	4933406P04Rik
ENSMUSG00000024042	78.1062	-1.07603	0.376364	-2.85901	0.0042497	0.0364798	ENSMUSG00000024042	17691	Sik1
ENSMUSG00000063889	240.342	-0.658949	0.230611	-2.8574	0.0042712	0.0366279	ENSMUSG00000063889	12916	Crem
ENSMUSG00000020000	1175.83	-0.871548	0.305449	-2.85334	0.00432627	0.0370449	ENSMUSG00000020000	59012	Moxd1
ENSMUSG00000041134	12.6811	-3.87585	1.35843	-2.85317	0.0043285	0.0370456	ENSMUSG00000041134	224405	Cyyr1
ENSMUSG00000024359	4468.55	-0.315186	0.11049	-2.85262	0.00433603	0.037056	ENSMUSG00000024359	15526	Hspa9
ENSMUSG00000027490	1001.88	-0.562048	0.197051	-2.8523	0.00434048	0.0370562	ENSMUSG00000027490	13555	E2f1
ENSMUSG00000021277	1056.4	-0.518818	0.181974	-2.85105	0.0043575	0.0371647	ENSMUSG00000021277	22031	Traf3
ENSMUSG00000020423	1066.29	-0.490974	0.172199	-2.8512	0.00435546	0.0371647	ENSMUSG00000020423	12227	Btg2
ENSMUSG00000023411	2797.01	-0.525428	0.184376	-2.84977	0.00437513	0.0372967	ENSMUSG00000023411	73181	Nfatc4
ENSMUSG00000061119	975.761	-0.459101	0.16116	-2.84873	0.00438946	0.0373972	ENSMUSG00000061119	72461	Prcp
ENSMUSG00000036833	300.248	-0.912221	0.320235	-2.8486	0.00439125	0.0373972	ENSMUSG00000036833	241274	Pnpla7
ENSMUSG00000019278	268.305	-1.01521	0.356446	-2.84813	0.00439768	0.037415	ENSMUSG00000019278	13479	Dpep1
ENSMUSG00000030577	10.4172	-3.97218	1.39502	-2.8474	0.00440779	0.0374825	ENSMUSG00000030577	12483	Cd22
ENSMUSG00000028567	1425.73	-0.434496	0.152632	-2.84669	0.00441769	0.0375297	ENSMUSG00000028567	66073	Txndc12
ENSMUSG00000049791	1191.66	-0.485225	0.170447	-2.84677	0.00441653	0.0375297	ENSMUSG00000049791	14366	Fzd4
ENSMUSG00000029815	912.045	-0.508429	0.178638	-2.84614	0.00442525	0.0375754	ENSMUSG00000029815	75593	Malsu1
ENSMUSG00000028961	4007.67	-0.357665	0.125682	-2.84579	0.00443009	0.037598	ENSMUSG00000028961	110208	Pgd
ENSMUSG00000057322	22649.9	-0.344101	0.120961	-2.84472	0.00444503	0.0376877	ENSMUSG00000057322	67671	Rpl38
ENSMUSG00000034761	938.309	-0.46491	0.163538	-2.84283	0.00447152	0.0378871	ENSMUSG00000034761	399510	Map4k5
ENSMUSG00000057534	178.466	-1.14217	0.401992	-2.84126	0.00449353	0.0380428	ENSMUSG00000057534	217066	Elobl
ENSMUSG00000060181	16.7189	-2.45681	0.864968	-2.84035	0.00450641	0.0381161	ENSMUSG00000060181	215436	Slc35e3
ENSMUSG00000010406	3915.91	-0.423007	0.148931	-2.84028	0.00450737	0.0381161	ENSMUSG00000010406	68836	Mrpl52
ENSMUSG00000073490	125.651	-1.40083	0.493246	-2.84002	0.00451113	0.0381171	ENSMUSG00000073490	226691	Ifi207
ENSMUSG00000037894	843.857	-0.527694	0.185831	-2.83965	0.00451631	0.0381422	ENSMUSG00000037894	51788	H2az1
ENSMUSG00000016308	1212.14	-0.385079	0.135714	-2.83744	0.00454769	0.0383508	ENSMUSG00000016308	22209	Ube2a
ENSMUSG00000032763	1170.31	-0.467244	0.164684	-2.83722	0.00455081	0.0383584	ENSMUSG00000032763	216136	Ilvbl
ENSMUSG00000028082	2376.19	-0.54308	0.191467	-2.83642	0.00456224	0.0383985	ENSMUSG00000028082	27059	Sh3d19
ENSMUSG00000107350	10.9251	-3.9145	1.38001	-2.83657	0.00456004	0.0383985	ENSMUSG00000107350	NA	Gm19610
ENSMUSG00000049751	852.344	-0.713137	0.251506	-2.83547	0.00457591	0.038476	ENSMUSG00000049751	66483	Rpl36al
ENSMUSG00000034707	6916.56	-0.469096	0.165546	-2.83363	0.0046023	0.0386414	ENSMUSG00000034707	75612	Gns
ENSMUSG00000109783	124.226	-1.06065	0.374856	-2.82948	0.00466241	0.03907	ENSMUSG00000109783	NA	Gm45338
ENSMUSG00000042719	841.156	-0.507128	0.179283	-2.82864	0.00467463	0.0391534	ENSMUSG00000042719	231713	Naa25
ENSMUSG00000047250	419.501	-0.629388	0.222654	-2.82676	0.00470219	0.039327	ENSMUSG00000047250	19224	Ptgs1
ENSMUSG00000032377	160.568	-1.19416	0.422507	-2.82638	0.00470769	0.0393539	ENSMUSG00000032377	235527	Plscr4
ENSMUSG00000020642	1893.45	-0.643556	0.227752	-2.82569	0.00471783	0.0393903	ENSMUSG00000020642	108089	Rnf144a
ENSMUSG00000019256	740.661	-0.531113	0.187973	-2.82547	0.00472117	0.0393903	ENSMUSG00000019256	11622	Ahr
ENSMUSG00000026820	475.906	-0.504253	0.178458	-2.82562	0.00471898	0.0393903	ENSMUSG00000026820	96979	Ptges2
ENSMUSG00000032604	2136.4	-0.345563	0.122357	-2.82421	0.00473974	0.039507	ENSMUSG00000032604	97541	Qars
ENSMUSG00000020430	1331.09	-0.460225	0.162951	-2.82431	0.00473823	0.039507	ENSMUSG00000020430	64934	Pes1
ENSMUSG00000043300	519.657	-0.625581	0.22158	-2.82327	0.0047536	0.0395597	ENSMUSG00000043300	26879	B3galnt1
ENSMUSG00000060591	7526.6	-0.54186	0.191955	-2.82285	0.00475996	0.0395609	ENSMUSG00000060591	80876	Ifitm2
ENSMUSG00000043284	1166.11	-0.433899	0.153945	-2.81854	0.0048242	0.0399984	ENSMUSG00000043284	216821	Tmem11
ENSMUSG00000042460	422.099	-0.534724	0.189778	-2.81763	0.00483789	0.0400927	ENSMUSG00000042460	94192	C1galt1
ENSMUSG00000060703	1276.66	-0.500478	0.177693	-2.81654	0.00485438	0.040173	ENSMUSG00000060703	66205	Cd302
ENSMUSG00000024379	65.716	-1.48412	0.526933	-2.81653	0.00485457	0.040173	ENSMUSG00000024379	53603	Tslp
ENSMUSG00000044576	16.8133	-3.6602	1.30031	-2.81487	0.00487968	0.040292	ENSMUSG00000044576	242915	Garem2
ENSMUSG00000030619	1029.31	-0.455743	0.161909	-2.81481	0.00488062	0.040292	ENSMUSG00000030619	13626	Eed
ENSMUSG00000021214	6.99497	-5.5328	1.96654	-2.81346	0.0049011	0.0404031	ENSMUSG00000021214	105349	Akr1c18
ENSMUSG00000109498	9.26803	-5.46813	1.94412	-2.81265	0.00491351	0.0404666	ENSMUSG00000109498	NA	Gm45222
ENSMUSG00000044162	101.273	-1.46275	0.520949	-2.80786	0.00498721	0.0409759	ENSMUSG00000044162	414084	Tnip3
ENSMUSG00000061013	318.127	-0.619414	0.220763	-2.80579	0.00501933	0.0411584	ENSMUSG00000061013	210719	Mkx
ENSMUSG00000107434	9.6149	-4.63561	1.6524	-2.80539	0.00502561	0.0411737	ENSMUSG00000107434	NA	Gm4640
ENSMUSG00000025429	60.124	-1.25098	0.446028	-2.80471	0.00503615	0.0411944	ENSMUSG00000025429	19201	Pstpip2
ENSMUSG00000020564	221.424	-0.817475	0.292005	-2.79953	0.00511778	0.04179	ENSMUSG00000020564	380753	Atxn7l1
ENSMUSG00000022018	261.245	-0.832889	0.297789	-2.79691	0.00515936	0.0420698	ENSMUSG00000022018	66214	Rgcc
ENSMUSG00000064115	29.4321	-2.99883	1.07218	-2.79694	0.00515886	0.0420698	ENSMUSG00000064115	239857	Cadm2
ENSMUSG00000028540	139.504	-0.879284	0.314551	-2.79536	0.00518421	0.0422126	ENSMUSG00000028540	67728	Dph2
ENSMUSG00000022890	3138.35	-0.440237	0.1575	-2.79515	0.00518758	0.04222	ENSMUSG00000022890	11957	Atp5j
ENSMUSG00000024927	1945.14	-0.362586	0.12998	-2.78955	0.00527816	0.042836	ENSMUSG00000024927	19697	Rela
ENSMUSG00000026942	297.293	-0.748018	0.268187	-2.78917	0.00528437	0.0428461	ENSMUSG00000026942	22030	Traf2
ENSMUSG00000034266	99.4444	-0.903983	0.324124	-2.789	0.00528704	0.0428476	ENSMUSG00000034266	53314	Batf
ENSMUSG00000031333	150.484	-0.911188	0.326958	-2.78687	0.00532205	0.0430909	ENSMUSG00000031333	11306	Abcb7
ENSMUSG00000026580	31.8837	-3.01955	1.08416	-2.78516	0.00535018	0.043278	ENSMUSG00000026580	20344	Selp
ENSMUSG00000030643	778.722	-0.491667	0.176663	-2.78308	0.00538456	0.0434564	ENSMUSG00000030643	75985	Rab30
ENSMUSG00000020387	371.061	-0.593671	0.213369	-2.78237	0.00539635	0.043529	ENSMUSG00000020387	76901	Jade2
ENSMUSG00000063011	15.0184	-3.98705	1.43352	-2.7813	0.00541419	0.0436525	ENSMUSG00000063011	56047	Msln
ENSMUSG00000028980	1738.22	-0.471048	0.169443	-2.77998	0.00543628	0.0437693	ENSMUSG00000028980	100198	H6pd
ENSMUSG00000026648	108.816	-1.05786	0.38068	-2.77888	0.0054547	0.0438767	ENSMUSG00000026648	227525	Dclre1c
ENSMUSG00000006024	2290.85	-0.362047	0.130311	-2.77832	0.00546407	0.0439316	ENSMUSG00000006024	108124	Napa
ENSMUSG00000118537	48.0018	-2.09253	0.753252	-2.778	0.0054695	0.0439547	ENSMUSG00000118537	113002583	Shld3
ENSMUSG00000060636	5608.7	-0.368989	0.13299	-2.77455	0.00552772	0.0442782	ENSMUSG00000060636	57808	Rpl35a
ENSMUSG00000047330	246.026	-0.941258	0.339361	-2.77362	0.0055437	0.044365	ENSMUSG00000047330	57814	Kcne4
ENSMUSG00000020257	1209.1	-0.442484	0.159569	-2.773	0.00555419	0.0444283	ENSMUSG00000020257	77305	Wdr82
ENSMUSG00000049401	1703.96	-0.547863	0.197642	-2.77199	0.00557142	0.0445447	ENSMUSG00000049401	72075	Ogfr
ENSMUSG00000073802	1879.54	-0.531763	0.192036	-2.76909	0.00562137	0.0447996	ENSMUSG00000073802	12579	Cdkn2b
ENSMUSG00000005045	21.2528	-2.44059	0.882313	-2.76613	0.00567261	0.0451662	ENSMUSG00000005045	269610	Chd5
ENSMUSG00000005683	2443.19	-0.411156	0.14868	-2.76537	0.00568588	0.045251	ENSMUSG00000005683	12974	Cs
ENSMUSG00000097354	52.5747	-1.61587	0.584498	-2.76454	0.00570025	0.0452708	ENSMUSG00000097354	NA	2310001H17Rik
ENSMUSG00000050914	77.5949	-1.98309	0.717384	-2.76433	0.00570393	0.0452708	ENSMUSG00000050914	654824	Ankrd37
ENSMUSG00000041798	17.9405	-2.41555	0.873763	-2.76454	0.00570024	0.0452708	ENSMUSG00000041798	103988	Gck
ENSMUSG00000024683	978.106	-0.414539	0.150051	-2.76265	0.00573341	0.0454197	ENSMUSG00000024683	94063	Mrpl16
ENSMUSG00000030104	979.305	-0.488783	0.177104	-2.75985	0.0057827	0.0457472	ENSMUSG00000030104	192193	Edem1
ENSMUSG00000047996	231.693	-1.01966	0.369522	-2.75941	0.00579067	0.0457893	ENSMUSG00000047996	546336	Prrg1
ENSMUSG00000026094	1096.69	-0.383684	0.139065	-2.75904	0.00579722	0.0458201	ENSMUSG00000026094	98267	Stk17b
ENSMUSG00000030397	1006.03	-0.407458	0.147706	-2.75857	0.00580549	0.0458435	ENSMUSG00000030397	232944	Mark4
ENSMUSG00000010025	690.061	-0.455039	0.164952	-2.75862	0.00580458	0.0458435	ENSMUSG00000010025	11671	Aldh3a2
ENSMUSG00000001166	88.4306	-1.19369	0.432869	-2.75763	0.00582225	0.0459547	ENSMUSG00000001166	114643	Oas1c
ENSMUSG00000046223	384.525	-0.653472	0.237017	-2.75707	0.0058322	0.0459912	ENSMUSG00000046223	18793	Plaur
ENSMUSG00000040380	11.4304	-3.02276	1.09644	-2.75687	0.00583571	0.0459979	ENSMUSG00000040380	56410	Cbln3
ENSMUSG00000024835	47.6777	-1.52412	0.553202	-2.75509	0.0058676	0.0462281	ENSMUSG00000024835	23789	Coro1b
ENSMUSG00000034248	709.459	-0.499035	0.181339	-2.75194	0.00592433	0.0465687	ENSMUSG00000034248	67712	Slc25a37
ENSMUSG00000112290	6.83149	-5.457	1.98443	-2.74991	0.00596122	0.0467978	ENSMUSG00000112290	NA	Gm33782
ENSMUSG00000029797	6.80467	-5.46018	1.98609	-2.74921	0.0059739	0.0468463	ENSMUSG00000029797	243369	Sspo
ENSMUSG00000060147	5934.08	-0.315861	0.114937	-2.74812	0.00599377	0.0469648	ENSMUSG00000060147	20719	Serpinb6a
ENSMUSG00000102123	5.35656	-5.30811	1.93337	-2.74553	0.00604141	0.0471881	ENSMUSG00000102123	NA	Gm4319
ENSMUSG00000038650	3759.78	-0.360052	0.131174	-2.74484	0.00605402	0.0472224	ENSMUSG00000038650	107702	Rnh1
ENSMUSG00000024993	431.508	-0.537219	0.195712	-2.74494	0.00605214	0.0472224	ENSMUSG00000024993	67894	Dennd10
ENSMUSG00000057465	48.3786	-8.30834	3.028	-2.74384	0.00607253	0.0473027	ENSMUSG00000057465	20209	Saa2
ENSMUSG00000048852	7.66629	-5.42233	1.97766	-2.74179	0.00611056	0.047556	ENSMUSG00000048852	620913	Gm12185
ENSMUSG00000023010	7037.37	-0.407311	0.148587	-2.74122	0.00612109	0.0476164	ENSMUSG00000023010	110213	Tmbim6
ENSMUSG00000105031	58.8897	-1.12932	0.412157	-2.74004	0.0061432	0.0477025	ENSMUSG00000105031	NA	Gm3511
ENSMUSG00000030751	2331.61	-0.34235	0.124942	-2.74007	0.00614258	0.0477025	ENSMUSG00000030751	26440	Psma1
ENSMUSG00000030677	574.726	-0.689821	0.251838	-2.73915	0.00615992	0.0477892	ENSMUSG00000030677	110033	Kif22
ENSMUSG00000028159	504.315	-0.538172	0.196619	-2.73713	0.00619779	0.0479936	ENSMUSG00000028159	26377	Dapp1
ENSMUSG00000090862	22704.5	-0.317911	0.116149	-2.73709	0.00619862	0.0479936	ENSMUSG00000090862	68052	Rps13
ENSMUSG00000068758	400.072	-0.728788	0.266272	-2.737	0.00620017	0.0479936	ENSMUSG00000068758	16188	Il3ra
ENSMUSG00000024892	548.315	-0.572361	0.2091	-2.73726	0.00619525	0.0479936	ENSMUSG00000024892	18563	Pcx
ENSMUSG00000082361	34.0754	-1.88479	0.688754	-2.73652	0.00620928	0.0480425	ENSMUSG00000082361	12223	Btc
ENSMUSG00000104667	70.7675	-1.04712	0.382946	-2.73438	0.00624983	0.0482914	ENSMUSG00000104667	242914	Gm4961
ENSMUSG00000078652	1237.29	-0.356899	0.130538	-2.73407	0.00625571	0.0483151	ENSMUSG00000078652	19192	Psme3
ENSMUSG00000104876	7.24517	-5.34851	1.9571	-2.73287	0.00627841	0.0484471	ENSMUSG00000104876	NA	Trdc
ENSMUSG00000036155	971.586	-0.413144	0.151247	-2.73158	0.00630318	0.0485731	ENSMUSG00000036155	107895	Mgat5
ENSMUSG00000041187	483.208	-0.523102	0.191484	-2.73184	0.00629824	0.0485732	ENSMUSG00000041187	101540	Prkd2
ENSMUSG00000022769	1123.01	-0.453599	0.16613	-2.7304	0.00632585	0.0486825	ENSMUSG00000022769	64136	Sdf2l1
ENSMUSG00000027068	173.567	-0.821477	0.300884	-2.73021	0.00632945	0.0486885	ENSMUSG00000027068	241452	Dhrs9
ENSMUSG00000089663	9.80933	-3.83258	1.404	-2.72975	0.00633821	0.0487342	ENSMUSG00000089663	NA	Gm15651
ENSMUSG00000024646	4818.48	-0.564706	0.207141	-2.72619	0.00640693	0.0491749	ENSMUSG00000024646	109672	Cyb5a
ENSMUSG00000056666	329.521	-0.617364	0.226562	-2.72493	0.00643157	0.0493202	ENSMUSG00000056666	67442	Retsat
ENSMUSG00000015837	6284.64	-0.290374	0.106603	-2.72388	0.00645202	0.0494449	ENSMUSG00000015837	18412	Sqstm1
ENSMUSG00000050565	4245.57	-0.443735	0.162965	-2.72288	0.00647147	0.0495596	ENSMUSG00000050565	240832	Tor1aip2
ENSMUSG00000062328	10273.7	-0.373226	0.137237	-2.71957	0.00653672	0.0499195	ENSMUSG00000062328	319195	Rpl17
ENSMUSG00000042350	28.7756	-2.1812	0.802196	-2.71904	0.00654715	0.0499472	ENSMUSG00000042350	68497	Arel1
ENSMUSG00000027099	660.944	-0.503369	0.185131	-2.71899	0.00654808	0.0499472	ENSMUSG00000027099	53375	Mtx2
